# Supplementary material for: Characterization of prophages in bacterial genomes from the honey bee (Apis mellifera) gut microbiome
Source: PeerJ. 2023 Jun 9;11:e15383. doi: 10.7717/peerj.15383 (PMC10259446; doi:10.7717/peerj.15383)
Supplement: Table S1 [file peerj-11-15383-s002.xlsx]

## Sheet: TableS1-Accession
Isolate	Genbank Assembly Accession
BaApis_BBC0122.fna	GCA_002007565.1
BaApis_BBC0178.fna	GCA_002007485.1
BaApis_BBC0244.fna	GCA_002007505.1
BaApis_PEB0122.fna	GCA_001952075.1
BaApis_PEB0149.fna	GCA_001952065.1
BaApis_PEB0150.fna	GCA_001952045.1
BiAsteroides_1460B.fna	GCA_002846895.1
BiAsteroides_Bin2.fna	GCA_000967185.1
BiAsteroides_Bin7.fna	GCA_000967265.1
BiAsteroides_DSM20089_2.fna	GCA_002715865.1
BiAsteroides_ESL0170.fna	GCA_003202855.1
BiAsteroides_ESL0198.fna	GCA_003202715.1
BiAsteroides_ESL0199.fna	GCA_003202755.1
BiAsteroides_ESL0200.fna	GCA_003202695.1
BiAsteroides_Hma3.fna	GCA_000970835.1
BiAsteroides_VRA9sqn.fna	GCA_009683175.1
BiAsteroides_W8102.fna	GCA_007559275.1
BiAsteroides_W8111.fna	GCA_007559155.1
BiCoryneforme_Bma6.fna	GCA_000967205.1
BiCoryneforme_LMG18911.fna	GCA_000737865.1
BiIndicum_ESL0197.fna	GCA_003202665.1
BoApis_SME1.fna	GCA_009362775.1
FrPerrara_ESL0167.fna	GCA_003202705.1
FrPerrara_PEB0191.fna	GCA_000807275.1
GiApicola_A1212.fna	GCA_002141675.1
GiApicola_A124.fna	GCA_002141515.1
GiApicola_A224.fna	GCA_002141565.1
GiApicola_A712.fna	GCA_002141655.1
GiApicola_A724.fna	GCA_002141665.1
GiApicola_A8.fna	GCA_002141555.1
GiApicola_A812.fna	GCA_002141715.1
GiApicola_A9.fna	GCA_002141735.1
GiApicola_A912.fna	GCA_002141745.1
GiApicola_AM4.fna	GCA_002141905.1
GiApicola_AM6.fna	GCA_002141575.1
GiApicola_AW11.fna	GCA_002141815.1
GiApicola_AW13.fna	GCA_002141755.1
GiApicola_Aw17.fna	GCA_002141595.1
GiApicola_ESL0177.fna	GCA_003202915.1
GiApicola_ESL0178.fna	GCA_003202815.1
GiApicola_ESL0182.fna	GCA_003202655.1
GiApicola_M63G.fna	GCA_001723875.1
GiApicola_N10.fna	GCA_002141785.1
GiApicola_N1212.fna	GCA_002088825.1
GiApicola_N1512.fna	GCA_002088905.1
GiApicola_N2.fna	GCA_002141855.1
GiApicola_N22.fna	GCA_002142285.1
GiApicola_N28.fna	GCA_002142345.1
GiApicola_N4.fna	GCA_002141635.1
GiApicola_N6.fna	GCA_002141885.1
GiApicola_N94.fna	GCA_002088895.1
GiApicola_NG5.fna	GCA_002142265.1
GiApicola_NO10.fna	GCA_002088845.1
GiApicola_NO5.fna	GCA_002088855.1
GiApicola_NO6.fna	GCA_002088795.1
GiApicola_NO8.fna	GCA_002088815.1
GiApicola_P54G.fna	GCA_001690735.1
GiApicola_SCGCB02.fna	GCA_000725165.1
GiApicola_SCGCI20.fna	GCA_000725175.1
GiApicola_W8127.fna	GCA_007559145.1
GiApicola_W8131.fna	GCA_007559165.1
GiApicola_wkB7.fna	GCA_001693435.1
GiApis_A412.fna	GCA_002141865.1
GiApis_AM1.fna	GCA_002141825.1
GiApis_ATSA1.fna	GCA_002142035.1
GiApis_ATSA2.fna	GCA_002142055.1
GiApis_ATSA3.fna	GCA_002142065.1
GiApis_ATSA4.fna	GCA_002142135.1
GiApis_ESL0169.fna	GCA_003202875.1
GiApis_ESL0172.fna	GCA_003202775.1
GiApis_M12G.fna	GCA_001690775.1
GiApis_NG1.fna	GCA_002142185.1
GiApis_NG3.fna	GCA_002142225.1
GiApis_NG4.fna	GCA_002142255.1
GiApis_NO1.fna	GCA_002141945.1
GiApis_NO12.fna	GCA_002142085.1
GiApis_NO13.fna	GCA_002141975.1
GiApis_NO14.fna	GCA_002142115.1
GiApis_NO15.fna	GCA_002141935.1
GiApis_NO16.fna	GCA_002141985.1
GiApis_NO3.fna	GCA_002142155.1
GiApis_NO4.fna	GCA_002142165.1
GiApis_P62G.fna	GCA_001690755.1
GiApis_P83G.fna	GCA_001690175.1
GiApis_SCGCABP17.fna	GCA_000725245.1
LaApis_ESL0185.fna	GCA_003150935.1
LaApis_Hma11.fna	GCA_000970735.1
LaApis_LMG26964.fna	GCA_002837055.1
LaHelsingborgensis_Bma5.fna	GCA_000970855.1
LaHelsingborgensis_ESL0183.fna	GCA_003173695.1
LaKimbladii_Hma2.fna	GCA_000970755.1
LaKullabergensis_Biut2.fna	GCA_000967195.1
LaKullabergensis_ESL0186.fna	GCA_003151025.1
LaKunkeei_3L.fna	GCA_006493615.1
LaKunkeei_AR114.fna	GCA_000830375.1
LaKunkeei_EFB6.fna	GCA_000687335.1
LaKunkeei_Fhon2.fna	GCA_001281165.1
LaKunkeei_KA01.fna	GCA_006493415.1
LaKunkeei_MP2_complete.fna	GCA_001314945.1
LaKunkeei_NN17.fna	GCA_005930975.1
LaKunkeei_NN19.fna	GCA_005930925.1
LaKunkeei_NN20.fna	GCA_005930935.1
LaKunkeei_NN5.fna	GCA_005930915.1
LaMellifer_Bin4.fna	GCA_000970795.1
LaMellis_ESL0294.fna	GCA_013346925.1
LaMellis_ESL0295.fna	GCA_013345055.1
LaMellis_ESL0394.fna	GCA_013347085.1
LaMellis_ESL0449.fna	GCA_013346905.1
LaMellis_Hon2.fna	GCA_000967245.1
LaMelliventris_ESL0184.fna	GCA_003202825.1
LaMelliventris_ESL0393.fna	GCA_013346935.1
LaMelliventris_Hma8.fna	GCA_000970775.1
MePlutonius_119.fna	GCA_001047515.1
MePlutonius_211.fna	GCA_001047455.1
MePlutonius_493.fna	GCA_001047395.1
MePlutonius_60.fna	GCA_001047545.1
MePlutonius_7645B.fna	GCA_001047465.1
MePlutonius_7656B.fna	GCA_001047435.1
MePlutonius_82.fna	GCA_001047595.1
MePlutonius_900.fna	GCA_001047445.1
MePlutonius_ATCC35311.fna	GCA_000270185.1
MePlutonius_B5.fna	GCA_001047405.1
MePlutonius_DAT1033.fna	GCA_009731445.1
MePlutonius_DAT561_2.fna	GCA_003966875.1
MePlutonius_DAT585.fna	GCA_004001205.1
MePlutonius_DAT606.fna	GCA_004001225.1
MePlutonius_H6.fna	GCA_001047525.1
MePlutonius_L9.fna	GCA_001047555.1
MePlutonius_S1.fna	GCA_000747585.1
PaApium_A29.fna	GCA_002917995.1
PaApium_AS1.fna	GCA_002592045.1
PaApium_B8.fna	GCA_002917945.1
PaApium_C6.fna	GCA_002917985.1
PaApium_G773c.fna	GCA_002079945.1
PaLarvae_ATCC13537.fna	GCA_002007765.1
PaLarvae_ATCC9545.fna	GCA_002003265.1
PaLarvae_B3650.fna	GCA_000187665.4
PaLarvae_BRL230010.fna	GCA_000153605.1
PaLarvae_CCM38.fna	GCA_002043025.1
PaLarvae_DSM25430_2.fna	GCA_002951895.1
PaLarvae_DSM25719.fna	GCA_000511115.1
PaLarvae_ERICI.fna	GCA_002951875.1
PaLarvae_EricIII.fna	GCA_002951915.1
PaLarvae_EricIV.fna	GCA_002951935.1
PaLarvae_EricV.fna	GCA_011220525.1
PaLarvae_MEX14.fna	GCA_000988145.1
PaLarvae_SAG10367.fna	GCA_002082155.1
SnAlvi_A1012.fna	GCA_002088405.1
SnAlvi_A11.fna	GCA_002089015.1
SnAlvi_A1112.fna	GCA_002088695.1
SnAlvi_A112.fna	GCA_002088735.1
SnAlvi_A12.fna	GCA_002088675.1
SnAlvi_A2.fna	GCA_002088395.1
SnAlvi_A212.fna	GCA_002088585.1
SnAlvi_A3.fna	GCA_002088455.1
SnAlvi_A5.fna	GCA_002088475.1
SnAlvi_A524.fna	GCA_002088465.1
SnAlvi_A924.fna	GCA_002088515.1
SnAlvi_Aw18.fna	GCA_002088415.1
SnAlvi_Aw20.fna	GCA_002019415.1
SnAlvi_E1.fna	GCA_002406645.1
SnAlvi_ESL0196.fna	GCA_003202885.1
SnAlvi_MS13.fna	GCA_002777925.1
SnAlvi_N23.fna	GCA_002088655.1
SnAlvi_N9.fna	GCA_002088575.1
SnAlvi_NS1.fna	GCA_002088755.1
SnAlvi_NS2.fna	GCA_002088595.1
SnAlvi_NS3.fna	GCA_002088635.1
SnAlvi_NS4.fna	GCA_002088665.1
SnAlvi_NS5.fna	GCA_002088765.1
SnAlvi_NW4.fna	GCA_002088525.1
SnAlvi_NW7.fna	GCA_002088555.1
SnAlvi_PEB0171.fna	GCA_002777865.1
SnAlvi_PEB0178.fna	GCA_002777875.1
SnAlvi_SCGCJ21.fna	GCA_000722505.1
SnAlvi_SCGCO02.fna	GCA_000725195.1
SnAlvi_SCGCO11.fna	GCA_000725185.1
SnAlvi_SCGCP14.fna	GCA_000725145.1
SnAlvi_wkB332.fna	GCA_002777695.1
SnAlvi_wkB339.fna	GCA_002777815.1
SnAlvi_wkB9.fna	GCA_002777735.1
