# Supplementary material for: Characterization of prophages in bacterial genomes from the honey bee (Apis mellifera) gut microbiome
Source: PeerJ. 2023 Jun 9;11:e15383. doi: 10.7717/peerj.15383 (PMC10259446; doi:10.7717/peerj.15383)
Supplement: Table S2 — The minimum, median ± SD, and maximum number of total and estimated intact prophage regions per genome, as well as total and estimated intact prophage composition per genome. Additionally, the minimum, median and maximum lengths of the bacterial genomes are included. [file peerj-11-15383-s003.xlsx]

## Sheet: S2 TotalProphage
	Bacterial Genome Length				ALL PREDICTED PROPHAGE												INTACT ONLY PREDICTED PROPHAGE
Bacterial Host	Min_BacLength	Med_BacLength	SD_BacLength	Max_BacLength	Min_NumPhage	Med_NumPhage	SD_NumPhage	Max_NumPhage	Min_PhagePercent	Med_PhagePerc	SD_PhagePercent	Max_PhagePercent	Min_PhageLength	Med_PhageLength	SD_PhageLength	Max_PhageLength	Min_NumPhage	Med_NumPhage	SD_NumPhage	Max_NumPhage	Min_PhagePercent	Med_PhagePerc	SD_PhagePercent	Max_PhagePercent	Min_PhageLength	Med_PhageLength	SD_PhageLength	Max_PhageLength
Bombella apis	1853237	2009499	76563.4	2086297	1	1.5	1.16905	4	1.35201	1.43322	1.89771	6.11289	10918	28774	7592.63	36754	0	0	0.516398	1	0	0	0.793479	1.64583	29504	31306	2548.41	33108
Bartonella apis	2525262	2602147	134693	2907212	1	1.5	0.547723	2	0.968794	1.52862	0.695015	2.8529	12730	30957	9632.52	41673	0	0	0.408248	1	0	0	0.658869	1.61389	41673	41673	NA	41673
Bifidobacterium asteroides	1933421	2153761	88789.2	2245218	0	0	0.492366	1	0	0	0.882599	2.14291	34318	37304	5350.81	46614	0	0	0.452267	1	0	0	0.843612	2.14291	36917	37691	5389.04	46614
Bifidobacterium coryneforme	1749707	1752429	3849.49	1755151	0	0.5	0.707107	1	0	0.682391	0.965047	1.36478	23954	23954	NA	23954	0	0	0	0	0	0	0	0	NA	NA	NA	NA
Bifidobacterium indicum	1715238	1715238	NA	1715238	1	1	NA	1	0.616533	0.616533	NA	0.616533	10575	10575	NA	10575	0	0	NA	0	0	0	NA	0	NA	NA	NA	NA
Frischella perrara	2558525	2625438	94629.3	2692351	1	1.5	0.707107	2	0.646075	1.06488	0.592279	1.48368	14373	16530	5942.34	25573	0	0	0	0	0	0	0	0	NA	NA	NA	NA
Lactobacillus mellifer	1815047	1815047	NA	1815047	0	0	NA	0	0	0	NA	0	NA	NA	NA	NA	0	0	NA	0	0	0	NA	0	NA	NA	NA	NA
Lactobacillus mellis	1683724	1743889	189266	2152631	0	1	1.30384	3	0	0.958959	2.39207	5.71459	6908	39127.5	17012.1	44759	0	0	0.447214	1	0	0	0.929878	2.07927	44759	44759	NA	44759
Lactobacillus apis	1588648	1683102	66668.5	1717379	0	0	0	0	0	0	0	0	NA	NA	NA	NA	0	0	0	0	0	0	0	0	NA	NA	NA	NA
Lactobacillus helsingborgensis	1867232	1943743	108203	2020254	0	0.5	0.707107	1	0	0.419043	0.592616	0.838085	15649	15649	NA	15649	0	0	0	0	0	0	0	0	NA	NA	NA	NA
Lactobacillus kimbladii	2186983	2186983	NA	2186983	0	0	NA	0	0	0	NA	0	NA	NA	NA	NA	0	0	NA	0	0	0	NA	0	NA	NA	NA	NA
Lactobacillus kullabergensis	2018944	2068661	70310.5	2118378	0	0.5	0.707107	1	0	0.9685	1.36967	1.937	41033	41033	NA	41033	0	0.5	0.707107	1	0	0.9685	1.36967	1.937	41033	41033	NA	41033
Lactobacillus melliventris	2014626	2036181	53490.1	2116151	1	1	0.57735	2	1.78919	1.81379	1.25281	3.97131	35734	37201.5	4298.78	45129	1	1	0.57735	2	1.78919	1.81379	1.25281	3.97131	35734	37201.5	4298.78	45129
Lactobacillus kunkeei	1484706	1559230	46588.8	1614522	0	0.5	0.527046	1	0	0.507587	1.42778	3.46319	15995	43827	18890.6	55914	0	0	0.483046	1	0	0	1.50871	3.46319	43827	49369	6050.43	55914
Gilliamella apis	1473857	2494021	223641	2685772	0	1	0.877924	3	0	0.821547	0.940082	3.63672	6211	21415.5	13110.2	54549	0	0	0.572768	2	0	0	0.815268	2.92221	23935	29623	12251.9	54549
Gilliamella apicola	1808043	3.03306e+06	274827	3537173	0	3	1.57866	6	0	2.03767	1.47391	7.00947	5487	18683	16061.4	119426	0	1	1.09441	5	0	0.885723	1.30883	5.54491	7557	27817	18546.1	119426
Snodgrassella alvi	1307751	2.43032e+06	302488	2548535	1	3	1.46407	7	0.703482	2.57673	1.39555	5.7777	5011	25380	13769.2	79095	0	1	0.603761	2	0	1.15773	1.08867	3.48429	26794	40107	10828.3	79095
Melissococcus plutonius	2021336	2068732	19558.6	2101145	1	2	0.635934	3	0.959169	2.7656	0.826551	4.78948	18625	32632	15282.8	73122	0	1	0.353553	2	0	1.70575	0.973049	3.81801	31444	37549	14446.4	73122
Paenibacillus larvae	4033192	4378174	254940	4800872	4	8	5.33013	21	3.15295	6.39588	3.08176	13.8463	5391	25754	27607.5	188984	2	4	1.98391	9	1.10767	4.57241	3.10221	11.4583	14060	45428.5	28512.4	188984
