# Supplementary material for: Characterization of prophages in bacterial genomes from the honey bee (Apis mellifera) gut microbiome
Source: PeerJ. 2023 Jun 9;11:e15383. doi: 10.7717/peerj.15383 (PMC10259446; doi:10.7717/peerj.15383)
Supplement: Table S3 — The percent of individual isolates within a bacterial species that possessed at least one estimated intact prophage. [file peerj-11-15383-s004.xlsx]

## Sheet: IntactFractioninGenomes_dc525
Bacterial Host	Total Isolates	Intact Isolates	Intact Fraction
Bartonella apis	6	1	16.6667
Bifidobacterium asteroides	12	3	25
Bifidobacterium coryneforme	2	0	0
Bifidobacterium indicum	1	0	0
Bombella apis	6	2	33.3333
Frischella perrara	2	0	0
Gilliamella apicola	38	27	71.0526
Gilliamella apis	23	7	30.4348
Lactobacillus apis	3	0	0
Lactobacillus helsingborgensis	2	0	0
Lactobacillus kimbladii	1	0	0
Lactobacillus kullabergensis	2	1	50
Lactobacillus kunkeei	10	3	30
Lactobacillus mellifer	1	0	0
Lactobacillus mellis	5	1	20
Lactobacillus melliventris	3	3	100
Melissococcus plutonius	17	16	94.1176
Paenibacillus larvae	13	13	100
Snodgrassella alvi	34	19	55.8824
