# Supplementary material for: Characterization of prophages in bacterial genomes from the honey bee (Apis mellifera) gut microbiome
Source: PeerJ. 2023 Jun 9;11:e15383. doi: 10.7717/peerj.15383 (PMC10259446; doi:10.7717/peerj.15383)
Supplement: Table S4 [file peerj-11-15383-s005.xlsx]

## Sheet: TableS4-BroadEggnog
COG.broad	Number of Total Hits	Frequency
CELLULAR PROCESSES AND SIGNALING	59	0.493022
INFORMATION STORAGE AND PROCESSING	187	1.56263
METABOLISM	61	0.509735
PHAGE	5797	48.4415
POORLY CHARACTERIZED	5863	48.9931
