# Supplementary material for: Characterization of prophages in bacterial genomes from the honey bee (Apis mellifera) gut microbiome
Source: PeerJ. 2023 Jun 9;11:e15383. doi: 10.7717/peerj.15383 (PMC10259446; doi:10.7717/peerj.15383)
Supplement: Table S5 [file peerj-11-15383-s006.xlsx]

## Sheet: TableS5-CogCat
COG Category	Total Hits	Frequency
Amino acid (E)	16	0.133701
Carbohydrate (G)	15	0.125345
Coenzyme (H)	5	0.0417816
Defense (V)	8	0.0668505
Energy (C)	4	0.0334253
Information processing (ALBY)	79	0.660149
Inorganic ion (P)	7	0.0584942
Lipid (I)	2	0.0167126
Membrane (MW)	10	0.0835631
Nucleotide (F)	6	0.0501379
Phage moron, auxiliary metabolic gene and host takeover	279	2.33141
Phage-associated	5518	46.1101
Secondary metabolite (Q)	6	0.0501379
Signaling (DTNZU)	25	0.208908
Transcription (K)	94	0.785493
Translation (JO)	30	0.250689
Unknown (S, No Hits)	5863	48.9931
