# Supplementary material for: Characterization of prophages in bacterial genomes from the honey bee (Apis mellifera) gut microbiome
Source: PeerJ. 2023 Jun 9;11:e15383. doi: 10.7717/peerj.15383 (PMC10259446; doi:10.7717/peerj.15383)
Supplement: Table S6 [file peerj-11-15383-s007.xlsx]

## Sheet: TableS6-BactCog
Bacterial Host	Total Proteins per Host	COG.broad	DetailedCategory	Specific Phage Classification (if present)	Phrog_Detailed	Relationship	Phylotype	Hits	Frequency
Bartonella apis	287	PHAGE	Phage-associated	head and packaging	head and packaging	Core	Bartonella apis	26	9.05923
Bartonella apis	287	PHAGE	Phage-associated	lysis	lysis	Core	Bartonella apis	10	3.48432
Bartonella apis	287	PHAGE	Phage moron, auxiliary metabolic gene and host takeover	moron, auxiliary metabolic gene and host takeover	moron, auxiliary metabolic gene and host takeover	Core	Bartonella apis	2	0.696864
Bartonella apis	287	INFORMATION STORAGE AND PROCESSING	Transcription (K)	Transcription (K)	not_viral	Core	Bartonella apis	4	1.39373
Bartonella apis	287	PHAGE	Phage-associated	transcription regulation	transcription regulation	Core	Bartonella apis	13	4.52962
Bartonella apis	287	POORLY CHARACTERIZED	Unknown (S, No Hits)	Unknown function (S)	other	Core	Bartonella apis	6	2.09059
Bartonella apis	287	PHAGE	Phage-associated	unknown function	unknown function	Core	Bartonella apis	8	2.78746
Bartonella apis	287	POORLY CHARACTERIZED	Unknown (S, No Hits)	No hits (0)	unknown function	Core	Bartonella apis	1	0.348432
Bartonella apis	287	METABOLISM	Carbohydrate (G)	Carbohydrate (G)	unknown function	Core	Bartonella apis	1	0.348432
Bartonella apis	287	PHAGE	Phage-associated	connector	connector	Core	Bartonella apis	3	1.0453
Bartonella apis	287	POORLY CHARACTERIZED	Unknown (S, No Hits)	Unknown (S, No Hits)	unknown function	Core	Bartonella apis	1	0.348432
Bartonella apis	287	INFORMATION STORAGE AND PROCESSING	Information processing (ALBY)	Replication, recombination, repair (L)	not_viral	Core	Bartonella apis	1	0.348432
Bartonella apis	287	PHAGE	Phage-associated	DNA, RNA and nucleotide metabolism	DNA, RNA and nucleotide metabolism	Core	Bartonella apis	21	7.31707
Bartonella apis	287	PHAGE	Phage-associated	tail	tail	Core	Bartonella apis	12	4.18118
Bartonella apis	287	POORLY CHARACTERIZED	Unknown (S, No Hits)	No hits (0)	not_viral	Core	Bartonella apis	91	31.7073
Bartonella apis	287	POORLY CHARACTERIZED	Unknown (S, No Hits)	Unknown function (S)	not_viral	Core	Bartonella apis	38	13.2404
Bartonella apis	287	INFORMATION STORAGE AND PROCESSING	Transcription (K)	Transcription (K)	unknown function	Core	Bartonella apis	1	0.348432
Bartonella apis	287	PHAGE	Phage-associated	not_viral	not_viral	Core	Bartonella apis	1	0.348432
Bartonella apis	287	POORLY CHARACTERIZED	Unknown (S, No Hits)	Unknown function (S)	unknown function	Core	Bartonella apis	45	15.6794
Bartonella apis	287	PHAGE	Phage-associated	integration and excision	integration and excision	Core	Bartonella apis	2	0.696864
Bifidobacterium asteroides	174	POORLY CHARACTERIZED	Unknown (S, No Hits)	Unknown function (S)	other	Core	Bifidobacterium spp.	1	0.574713
Bifidobacterium asteroides	174	PHAGE	Phage-associated	lysis	lysis	Core	Bifidobacterium spp.	7	4.02299
Bifidobacterium asteroides	174	POORLY CHARACTERIZED	Unknown (S, No Hits)	No hits (0)	unknown function	Core	Bifidobacterium spp.	1	0.574713
Bifidobacterium asteroides	174	PHAGE	Phage-associated	connector	connector	Core	Bifidobacterium spp.	6	3.44828
Bifidobacterium asteroides	174	POORLY CHARACTERIZED	Unknown (S, No Hits)	No hits (0)	not_viral	Core	Bifidobacterium spp.	51	29.3103
Bifidobacterium asteroides	174	PHAGE	Phage-associated	head and packaging	head and packaging	Core	Bifidobacterium spp.	18	10.3448
Bifidobacterium asteroides	174	INFORMATION STORAGE AND PROCESSING	Transcription (K)	Transcription (K)	other	Core	Bifidobacterium spp.	1	0.574713
Bifidobacterium asteroides	174	PHAGE	Phage-associated	transcription regulation	transcription regulation	Core	Bifidobacterium spp.	3	1.72414
Bifidobacterium asteroides	174	PHAGE	Phage-associated	tail	tail	Core	Bifidobacterium spp.	13	7.47126
Bifidobacterium asteroides	174	INFORMATION STORAGE AND PROCESSING	Transcription (K)	Transcription (K)	not_viral	Core	Bifidobacterium spp.	3	1.72414
Bifidobacterium asteroides	174	PHAGE	Phage-associated	DNA, RNA and nucleotide metabolism	DNA, RNA and nucleotide metabolism	Core	Bifidobacterium spp.	21	12.069
Bifidobacterium asteroides	174	PHAGE	Phage-associated	integration and excision	integration and excision	Core	Bifidobacterium spp.	4	2.29885
Bifidobacterium asteroides	174	POORLY CHARACTERIZED	Unknown (S, No Hits)	Unknown function (S)	unknown function	Core	Bifidobacterium spp.	20	11.4943
Bifidobacterium asteroides	174	PHAGE	Phage moron, auxiliary metabolic gene and host takeover	moron, auxiliary metabolic gene and host takeover	moron, auxiliary metabolic gene and host takeover	Core	Bifidobacterium spp.	1	0.574713
Bifidobacterium asteroides	174	PHAGE	Phage-associated	not_viral	not_viral	Core	Bifidobacterium spp.	1	0.574713
Bifidobacterium asteroides	174	POORLY CHARACTERIZED	Unknown (S, No Hits)	Unknown function (S)	not_viral	Core	Bifidobacterium spp.	23	13.2184
Bifidobacterium coryneforme	33	PHAGE	Phage-associated	DNA, RNA and nucleotide metabolism	DNA, RNA and nucleotide metabolism	Core	Bifidobacterium spp.	4	12.1212
Bifidobacterium coryneforme	33	POORLY CHARACTERIZED	Unknown (S, No Hits)	Unknown function (S)	other	Core	Bifidobacterium spp.	1	3.0303
Bifidobacterium coryneforme	33	INFORMATION STORAGE AND PROCESSING	Transcription (K)	Transcription (K)	not_viral	Core	Bifidobacterium spp.	1	3.0303
Bifidobacterium coryneforme	33	PHAGE	Phage-associated	transcription regulation	transcription regulation	Core	Bifidobacterium spp.	1	3.0303
Bifidobacterium coryneforme	33	PHAGE	Phage-associated	tail	tail	Core	Bifidobacterium spp.	6	18.1818
Bifidobacterium coryneforme	33	POORLY CHARACTERIZED	Unknown (S, No Hits)	No hits (0)	not_viral	Core	Bifidobacterium spp.	8	24.2424
Bifidobacterium coryneforme	33	POORLY CHARACTERIZED	Unknown (S, No Hits)	Unknown function (S)	unknown function	Core	Bifidobacterium spp.	4	12.1212
Bifidobacterium coryneforme	33	PHAGE	Phage-associated	not_viral	not_viral	Core	Bifidobacterium spp.	1	3.0303
Bifidobacterium coryneforme	33	INFORMATION STORAGE AND PROCESSING	Information processing (ALBY)	Replication, recombination, repair (L)	not_viral	Core	Bifidobacterium spp.	1	3.0303
Bifidobacterium coryneforme	33	POORLY CHARACTERIZED	Unknown (S, No Hits)	Unknown function (S)	not_viral	Core	Bifidobacterium spp.	3	9.09091
Bifidobacterium coryneforme	33	PHAGE	Phage-associated	lysis	lysis	Core	Bifidobacterium spp.	2	6.06061
Bifidobacterium coryneforme	33	PHAGE	Phage-associated	head and packaging	head and packaging	Core	Bifidobacterium spp.	1	3.0303
Bifidobacterium indicum	13	METABOLISM	Secondary metabolite (Q)	Secondary metabolite (Q)	not_viral	Core	Bifidobacterium spp.	1	7.69231
Bifidobacterium indicum	13	METABOLISM	Nucleotide (F)	Nucleotide (F)	not_viral	Core	Bifidobacterium spp.	1	7.69231
Bifidobacterium indicum	13	PHAGE	Phage-associated	transcription regulation	transcription regulation	Core	Bifidobacterium spp.	1	7.69231
Bifidobacterium indicum	13	INFORMATION STORAGE AND PROCESSING	Transcription (K)	Transcription (K)	not_viral	Core	Bifidobacterium spp.	1	7.69231
Bifidobacterium indicum	13	POORLY CHARACTERIZED	Unknown (S, No Hits)	Unknown function (S)	unknown function	Core	Bifidobacterium spp.	1	7.69231
Bifidobacterium indicum	13	POORLY CHARACTERIZED	Unknown (S, No Hits)	Unknown function (S)	not_viral	Core	Bifidobacterium spp.	3	23.0769
Bifidobacterium indicum	13	PHAGE	Phage-associated	not_viral	not_viral	Core	Bifidobacterium spp.	1	7.69231
Bifidobacterium indicum	13	POORLY CHARACTERIZED	Unknown (S, No Hits)	No hits (0)	not_viral	Core	Bifidobacterium spp.	4	30.7692
Bombella apis	256	PHAGE	Phage-associated	DNA, RNA and nucleotide metabolism	DNA, RNA and nucleotide metabolism	Core	Acetobacter	11	4.29688
Bombella apis	256	PHAGE	Phage-associated	head and packaging	head and packaging	Core	Acetobacter	53	20.7031
Bombella apis	256	POORLY CHARACTERIZED	Unknown (S, No Hits)	No hits (0)	unknown function	Core	Acetobacter	4	1.5625
Bombella apis	256	CELLULAR PROCESSES AND SIGNALING	Translation (JO)	Posttranslational (O)	unknown function	Core	Acetobacter	1	0.390625
Bombella apis	256	PHAGE	Phage-associated	not_viral	not_viral	Core	Acetobacter	3	1.17188
Bombella apis	256	PHAGE	Phage-associated	lysis	lysis	Core	Acetobacter	4	1.5625
Bombella apis	256	PHAGE	Phage-associated	connector	connector	Core	Acetobacter	9	3.51562
Bombella apis	256	POORLY CHARACTERIZED	Unknown (S, No Hits)	No hits (0)	not_viral	Core	Acetobacter	80	31.25
Bombella apis	256	PHAGE	Phage-associated	tail	tail	Core	Acetobacter	39	15.2344
Bombella apis	256	POORLY CHARACTERIZED	Unknown (S, No Hits)	Unknown function (S)	not_viral	Core	Acetobacter	8	3.125
Bombella apis	256	PHAGE	Phage-associated	integration and excision	integration and excision	Core	Acetobacter	3	1.17188
Bombella apis	256	POORLY CHARACTERIZED	Unknown (S, No Hits)	Unknown function (S)	other	Core	Acetobacter	4	1.5625
Bombella apis	256	PHAGE	Phage-associated	transcription regulation	transcription regulation	Core	Acetobacter	7	2.73438
Bombella apis	256	PHAGE	Phage-associated	unknown function	unknown function	Core	Acetobacter	1	0.390625
Bombella apis	256	POORLY CHARACTERIZED	Unknown (S, No Hits)	Unknown function (S)	unknown function	Core	Acetobacter	28	10.9375
Bombella apis	256	CELLULAR PROCESSES AND SIGNALING	Signaling (DTNZU)	Signal transd. (T)	not_viral	Core	Acetobacter	1	0.390625
Frischella perrara	58	PHAGE	Phage-associated	DNA, RNA and nucleotide metabolism	DNA, RNA and nucleotide metabolism	Core	Frischella perrara	3	5.17241
Frischella perrara	58	PHAGE	Phage-associated	tail	tail	Core	Frischella perrara	26	44.8276
Frischella perrara	58	POORLY CHARACTERIZED	Unknown (S, No Hits)	No hits (0)	not_viral	Core	Frischella perrara	10	17.2414
Frischella perrara	58	PHAGE	Phage-associated	lysis	lysis	Core	Frischella perrara	3	5.17241
Frischella perrara	58	PHAGE	Phage-associated	not_viral	not_viral	Core	Frischella perrara	1	1.72414
Frischella perrara	58	PHAGE	Phage-associated	unknown function	unknown function	Core	Frischella perrara	1	1.72414
Frischella perrara	58	POORLY CHARACTERIZED	Unknown (S, No Hits)	Unknown function (S)	not_viral	Core	Frischella perrara	4	6.89655
Frischella perrara	58	POORLY CHARACTERIZED	Unknown (S, No Hits)	Unknown function (S)	unknown function	Core	Frischella perrara	4	6.89655
Frischella perrara	58	PHAGE	Phage-associated	head and packaging	head and packaging	Core	Frischella perrara	4	6.89655
Frischella perrara	58	CELLULAR PROCESSES AND SIGNALING	Signaling (DTNZU)	Signal transd. (T)	unknown function	Core	Frischella perrara	1	1.72414
Frischella perrara	58	CELLULAR PROCESSES AND SIGNALING	Membrane (MW)	Cell membrane (M)	not_viral	Core	Frischella perrara	1	1.72414
Gilliamella apicola	2102	POORLY CHARACTERIZED	Unknown (S, No Hits)	Unknown function (S)	other	Core	Gilliamella spp.	48	2.28354
Gilliamella apicola	2102	CELLULAR PROCESSES AND SIGNALING	Membrane (MW)	Cell membrane (M)	unknown function	Core	Gilliamella spp.	1	0.0475737
Gilliamella apicola	2102	PHAGE	Phage-associated	lysis	lysis	Core	Gilliamella spp.	152	7.23121
Gilliamella apicola	2102	PHAGE	Phage-associated	integration and excision	integration and excision	Core	Gilliamella spp.	83	3.94862
Gilliamella apicola	2102	POORLY CHARACTERIZED	Unknown (S, No Hits)	No hits (0)	unknown function	Core	Gilliamella spp.	27	1.28449
Gilliamella apicola	2102	PHAGE	Phage-associated	tail	tail	Core	Gilliamella spp.	437	20.7897
Gilliamella apicola	2102	INFORMATION STORAGE AND PROCESSING	Transcription (K)	Transcription (K)	not_viral	Core	Gilliamella spp.	6	0.285442
Gilliamella apicola	2102	CELLULAR PROCESSES AND SIGNALING	Translation (JO)	Posttranslational (O)	unknown function	Core	Gilliamella spp.	1	0.0475737
Gilliamella apicola	2102	PHAGE	Phage-associated	DNA, RNA and nucleotide metabolism	DNA, RNA and nucleotide metabolism	Core	Gilliamella spp.	153	7.27878
Gilliamella apicola	2102	METABOLISM	Nucleotide (F)	Nucleotide (F)	other	Core	Gilliamella spp.	1	0.0475737
Gilliamella apicola	2102	PHAGE	Phage-associated	transcription regulation	transcription regulation	Core	Gilliamella spp.	104	4.94767
Gilliamella apicola	2102	POORLY CHARACTERIZED	Unknown (S, No Hits)	Unknown (S, No Hits)	other	Core	Gilliamella spp.	1	0.0475737
Gilliamella apicola	2102	METABOLISM	Coenzyme (H)	Coenzyme (H)	other	Core	Gilliamella spp.	2	0.0951475
Gilliamella apicola	2102	POORLY CHARACTERIZED	Unknown (S, No Hits)	No hits (0)	not_viral	Core	Gilliamella spp.	438	20.8373
Gilliamella apicola	2102	INFORMATION STORAGE AND PROCESSING	Information processing (ALBY)	Replication, recombination, repair (L)	unknown function	Core	Gilliamella spp.	15	0.713606
Gilliamella apicola	2102	METABOLISM	Amino acid (E)	Amino acid (E)	not_viral	Core	Gilliamella spp.	4	0.190295
Gilliamella apicola	2102	METABOLISM	Carbohydrate (G)	Carbohydrate (G)	unknown function	Core	Gilliamella spp.	2	0.0951475
Gilliamella apicola	2102	POORLY CHARACTERIZED	Unknown (S, No Hits)	Unknown function (S)	unknown function	Core	Gilliamella spp.	184	8.75357
Gilliamella apicola	2102	INFORMATION STORAGE AND PROCESSING	Information processing (ALBY)	Replication, recombination, repair (L)	other	Core	Gilliamella spp.	5	0.237869
Gilliamella apicola	2102	POORLY CHARACTERIZED	Unknown (S, No Hits)	Unknown (S, No Hits)	unknown function	Core	Gilliamella spp.	1	0.0475737
Gilliamella apicola	2102	PHAGE	Phage-associated	unknown function	unknown function	Core	Gilliamella spp.	36	1.71265
Gilliamella apicola	2102	PHAGE	Phage-associated	not_viral	not_viral	Core	Gilliamella spp.	25	1.18934
Gilliamella apicola	2102	PHAGE	Phage-associated	connector	connector	Core	Gilliamella spp.	86	4.09134
Gilliamella apicola	2102	CELLULAR PROCESSES AND SIGNALING	Signaling (DTNZU)	Signal transd. (T)	unknown function	Core	Gilliamella spp.	1	0.0475737
Gilliamella apicola	2102	PHAGE	Phage-associated	head and packaging	head and packaging	Core	Gilliamella spp.	118	5.6137
Gilliamella apicola	2102	POORLY CHARACTERIZED	Unknown (S, No Hits)	Unknown function (S)	not_viral	Core	Gilliamella spp.	132	6.27973
Gilliamella apicola	2102	INFORMATION STORAGE AND PROCESSING	Information processing (ALBY)	Replication, recombination, repair (L)	not_viral	Core	Gilliamella spp.	1	0.0475737
Gilliamella apicola	2102	METABOLISM	Carbohydrate (G)	Carbohydrate (G)	not_viral	Core	Gilliamella spp.	2	0.0951475
Gilliamella apicola	2102	PHAGE	Phage moron, auxiliary metabolic gene and host takeover	moron, auxiliary metabolic gene and host takeover	moron, auxiliary metabolic gene and host takeover	Core	Gilliamella spp.	30	1.42721
Gilliamella apicola	2102	METABOLISM	Amino acid (E)	Amino acid (E)	unknown function	Core	Gilliamella spp.	4	0.190295
Gilliamella apicola	2102	CELLULAR PROCESSES AND SIGNALING	Signaling (DTNZU)	Signal transd. (T)	other	Core	Gilliamella spp.	1	0.0475737
Gilliamella apicola	2102	INFORMATION STORAGE AND PROCESSING	Transcription (K)	Transcription (K)	unknown function	Core	Gilliamella spp.	1	0.0475737
Gilliamella apis	603	INFORMATION STORAGE AND PROCESSING	Transcription (K)	Transcription (K)	not_viral	Core	Gilliamella spp.	5	0.829187
Gilliamella apis	603	INFORMATION STORAGE AND PROCESSING	Information processing (ALBY)	Replication, recombination, repair (L)	unknown function	Core	Gilliamella spp.	1	0.165837
Gilliamella apis	603	PHAGE	Phage-associated	not_viral	not_viral	Core	Gilliamella spp.	3	0.497512
Gilliamella apis	603	METABOLISM	Carbohydrate (G)	Carbohydrate (G)	unknown function	Core	Gilliamella spp.	1	0.165837
Gilliamella apis	603	CELLULAR PROCESSES AND SIGNALING	Membrane (MW)	Cell membrane (M)	not_viral	Core	Gilliamella spp.	1	0.165837
Gilliamella apis	603	PHAGE	Phage-associated	lysis	lysis	Core	Gilliamella spp.	28	4.64345
Gilliamella apis	603	POORLY CHARACTERIZED	Unknown (S, No Hits)	No hits (0)	not_viral	Core	Gilliamella spp.	135	22.3881
Gilliamella apis	603	PHAGE	Phage-associated	transcription regulation	transcription regulation	Core	Gilliamella spp.	52	8.62355
Gilliamella apis	603	PHAGE	Phage-associated	unknown function	unknown function	Core	Gilliamella spp.	12	1.99005
Gilliamella apis	603	POORLY CHARACTERIZED	Unknown (S, No Hits)	Unknown function (S)	not_viral	Core	Gilliamella spp.	55	9.12106
Gilliamella apis	603	PHAGE	Phage-associated	head and packaging	head and packaging	Core	Gilliamella spp.	19	3.15091
Gilliamella apis	603	PHAGE	Phage-associated	integration and excision	integration and excision	Core	Gilliamella spp.	13	2.15589
Gilliamella apis	603	PHAGE	Phage-associated	DNA, RNA and nucleotide metabolism	DNA, RNA and nucleotide metabolism	Core	Gilliamella spp.	50	8.29187
Gilliamella apis	603	PHAGE	Phage-associated	tail	tail	Core	Gilliamella spp.	114	18.9055
Gilliamella apis	603	POORLY CHARACTERIZED	Unknown (S, No Hits)	No hits (0)	unknown function	Core	Gilliamella spp.	14	2.32172
Gilliamella apis	603	POORLY CHARACTERIZED	Unknown (S, No Hits)	Unknown function (S)	unknown function	Core	Gilliamella spp.	56	9.2869
Gilliamella apis	603	POORLY CHARACTERIZED	Unknown (S, No Hits)	Unknown function (S)	other	Core	Gilliamella spp.	10	1.65837
Gilliamella apis	603	PHAGE	Phage moron, auxiliary metabolic gene and host takeover	moron, auxiliary metabolic gene and host takeover	moron, auxiliary metabolic gene and host takeover	Core	Gilliamella spp.	12	1.99005
Gilliamella apis	603	INFORMATION STORAGE AND PROCESSING	Information processing (ALBY)	Replication, recombination, repair (L)	other	Core	Gilliamella spp.	1	0.165837
Gilliamella apis	603	PHAGE	Phage-associated	connector	connector	Core	Gilliamella spp.	18	2.98507
Gilliamella apis	603	METABOLISM	Carbohydrate (G)	Carbohydrate (G)	not_viral	Core	Gilliamella spp.	3	0.497512
Lactobacillus helsingborgensis	28	POORLY CHARACTERIZED	Unknown (S, No Hits)	No hits (0)	unknown function	Core	Firm-5	2	7.14286
Lactobacillus helsingborgensis	28	PHAGE	Phage-associated	DNA, RNA and nucleotide metabolism	DNA, RNA and nucleotide metabolism	Core	Firm-5	7	25
Lactobacillus helsingborgensis	28	PHAGE	Phage-associated	head and packaging	head and packaging	Core	Firm-5	1	3.57143
Lactobacillus helsingborgensis	28	POORLY CHARACTERIZED	Unknown (S, No Hits)	No hits (0)	not_viral	Core	Firm-5	6	21.4286
Lactobacillus helsingborgensis	28	POORLY CHARACTERIZED	Unknown (S, No Hits)	Unknown function (S)	other	Core	Firm-5	1	3.57143
Lactobacillus helsingborgensis	28	INFORMATION STORAGE AND PROCESSING	Transcription (K)	Transcription (K)	not_viral	Core	Firm-5	1	3.57143
Lactobacillus helsingborgensis	28	PHAGE	Phage-associated	transcription regulation	transcription regulation	Core	Firm-5	2	7.14286
Lactobacillus helsingborgensis	28	POORLY CHARACTERIZED	Unknown (S, No Hits)	Unknown function (S)	unknown function	Core	Firm-5	3	10.7143
Lactobacillus helsingborgensis	28	PHAGE	Phage-associated	integration and excision	integration and excision	Core	Firm-5	1	3.57143
Lactobacillus helsingborgensis	28	POORLY CHARACTERIZED	Unknown (S, No Hits)	Unknown function (S)	not_viral	Core	Firm-5	4	14.2857
Lactobacillus kullabergensis	61	POORLY CHARACTERIZED	Unknown (S, No Hits)	No hits (0)	not_viral	Core	Firm-5	12	19.6721
Lactobacillus kullabergensis	61	POORLY CHARACTERIZED	Unknown (S, No Hits)	Unknown function (S)	unknown function	Core	Firm-5	7	11.4754
Lactobacillus kullabergensis	61	POORLY CHARACTERIZED	Unknown (S, No Hits)	Unknown function (S)	other	Core	Firm-5	3	4.91803
Lactobacillus kullabergensis	61	PHAGE	Phage-associated	DNA, RNA and nucleotide metabolism	DNA, RNA and nucleotide metabolism	Core	Firm-5	8	13.1148
Lactobacillus kullabergensis	61	PHAGE	Phage-associated	unknown function	unknown function	Core	Firm-5	1	1.63934
Lactobacillus kullabergensis	61	PHAGE	Phage-associated	tail	tail	Core	Firm-5	8	13.1148
Lactobacillus kullabergensis	61	PHAGE	Phage-associated	transcription regulation	transcription regulation	Core	Firm-5	2	3.27869
Lactobacillus kullabergensis	61	POORLY CHARACTERIZED	Unknown (S, No Hits)	No hits (0)	unknown function	Core	Firm-5	4	6.55738
Lactobacillus kullabergensis	61	PHAGE	Phage-associated	lysis	lysis	Core	Firm-5	3	4.91803
Lactobacillus kullabergensis	61	PHAGE	Phage-associated	connector	connector	Core	Firm-5	3	4.91803
Lactobacillus kullabergensis	61	POORLY CHARACTERIZED	Unknown (S, No Hits)	Unknown function (S)	not_viral	Core	Firm-5	3	4.91803
Lactobacillus kullabergensis	61	PHAGE	Phage-associated	integration and excision	integration and excision	Core	Firm-5	1	1.63934
Lactobacillus kullabergensis	61	PHAGE	Phage-associated	head and packaging	head and packaging	Core	Firm-5	6	9.83607
Lactobacillus kunkeei	243	PHAGE	Phage-associated	transcription regulation	transcription regulation	Core	Lactobacillus kunkeei	12	4.93827
Lactobacillus kunkeei	243	POORLY CHARACTERIZED	Unknown (S, No Hits)	Unknown function (S)	unknown function	Core	Lactobacillus kunkeei	20	8.23045
Lactobacillus kunkeei	243	POORLY CHARACTERIZED	Unknown (S, No Hits)	No hits (0)	not_viral	Core	Lactobacillus kunkeei	64	26.3374
Lactobacillus kunkeei	243	PHAGE	Phage-associated	tail	tail	Core	Lactobacillus kunkeei	20	8.23045
Lactobacillus kunkeei	243	INFORMATION STORAGE AND PROCESSING	Transcription (K)	Transcription (K)	not_viral	Core	Lactobacillus kunkeei	3	1.23457
Lactobacillus kunkeei	243	PHAGE	Phage-associated	not_viral	not_viral	Core	Lactobacillus kunkeei	3	1.23457
Lactobacillus kunkeei	243	PHAGE	Phage-associated	integration and excision	integration and excision	Core	Lactobacillus kunkeei	7	2.88066
Lactobacillus kunkeei	243	INFORMATION STORAGE AND PROCESSING	Information processing (ALBY)	Replication, recombination, repair (L)	unknown function	Core	Lactobacillus kunkeei	4	1.64609
Lactobacillus kunkeei	243	INFORMATION STORAGE AND PROCESSING	Transcription (K)	Transcription (K)	unknown function	Core	Lactobacillus kunkeei	2	0.823045
Lactobacillus kunkeei	243	POORLY CHARACTERIZED	Unknown (S, No Hits)	No hits (0)	unknown function	Core	Lactobacillus kunkeei	5	2.05761
Lactobacillus kunkeei	243	POORLY CHARACTERIZED	Unknown (S, No Hits)	Unknown function (S)	not_viral	Core	Lactobacillus kunkeei	41	16.8724
Lactobacillus kunkeei	243	PHAGE	Phage-associated	lysis	lysis	Core	Lactobacillus kunkeei	8	3.29218
Lactobacillus kunkeei	243	POORLY CHARACTERIZED	Unknown (S, No Hits)	Unknown (S, No Hits)	not_viral	Core	Lactobacillus kunkeei	2	0.823045
Lactobacillus kunkeei	243	PHAGE	Phage-associated	DNA, RNA and nucleotide metabolism	DNA, RNA and nucleotide metabolism	Core	Lactobacillus kunkeei	17	6.99588
Lactobacillus kunkeei	243	CELLULAR PROCESSES AND SIGNALING	Defense (V)	Defense (V)	other	Core	Lactobacillus kunkeei	1	0.411523
Lactobacillus kunkeei	243	METABOLISM	Carbohydrate (G)	Carbohydrate (G)	not_viral	Core	Lactobacillus kunkeei	1	0.411523
Lactobacillus kunkeei	243	PHAGE	Phage-associated	head and packaging	head and packaging	Core	Lactobacillus kunkeei	26	10.6996
Lactobacillus kunkeei	243	PHAGE	Phage moron, auxiliary metabolic gene and host takeover	moron, auxiliary metabolic gene and host takeover	moron, auxiliary metabolic gene and host takeover	Core	Lactobacillus kunkeei	4	1.64609
Lactobacillus kunkeei	243	PHAGE	Phage-associated	connector	connector	Core	Lactobacillus kunkeei	3	1.23457
Lactobacillus mellis	244	CELLULAR PROCESSES AND SIGNALING	Defense (V)	Defense (V)	other	Core	Firm-4	1	0.409836
Lactobacillus mellis	244	PHAGE	Phage-associated	DNA, RNA and nucleotide metabolism	DNA, RNA and nucleotide metabolism	Core	Firm-4	35	14.3443
Lactobacillus mellis	244	PHAGE	Phage-associated	other	other	Core	Firm-4	1	0.409836
Lactobacillus mellis	244	PHAGE	Phage-associated	lysis	lysis	Core	Firm-4	5	2.04918
Lactobacillus mellis	244	PHAGE	Phage-associated	transcription regulation	transcription regulation	Core	Firm-4	9	3.68852
Lactobacillus mellis	244	POORLY CHARACTERIZED	Unknown (S, No Hits)	No hits (0)	not_viral	Core	Firm-4	62	25.4098
Lactobacillus mellis	244	CELLULAR PROCESSES AND SIGNALING	Defense (V)	Defense (V)	not_viral	Core	Firm-4	1	0.409836
Lactobacillus mellis	244	INFORMATION STORAGE AND PROCESSING	Transcription (K)	Transcription (K)	not_viral	Core	Firm-4	4	1.63934
Lactobacillus mellis	244	PHAGE	Phage-associated	connector	connector	Core	Firm-4	7	2.86885
Lactobacillus mellis	244	INFORMATION STORAGE AND PROCESSING	Transcription (K)	Transcription (K)	unknown function	Core	Firm-4	2	0.819672
Lactobacillus mellis	244	CELLULAR PROCESSES AND SIGNALING	Translation (JO)	Posttranslational (O)	unknown function	Core	Firm-4	1	0.409836
Lactobacillus mellis	244	INFORMATION STORAGE AND PROCESSING	Information processing (ALBY)	Replication, recombination, repair (L)	other	Core	Firm-4	3	1.22951
Lactobacillus mellis	244	POORLY CHARACTERIZED	Unknown (S, No Hits)	No hits (0)	unknown function	Core	Firm-4	3	1.22951
Lactobacillus mellis	244	METABOLISM	Lipid (I)	Lipid (I)	unknown function	Core	Firm-4	1	0.409836
Lactobacillus mellis	244	POORLY CHARACTERIZED	Unknown (S, No Hits)	Unknown function (S)	other	Core	Firm-4	9	3.68852
Lactobacillus mellis	244	PHAGE	Phage moron, auxiliary metabolic gene and host takeover	moron, auxiliary metabolic gene and host takeover	moron, auxiliary metabolic gene and host takeover	Core	Firm-4	3	1.22951
Lactobacillus mellis	244	PHAGE	Phage-associated	head and packaging	head and packaging	Core	Firm-4	23	9.42623
Lactobacillus mellis	244	PHAGE	Phage-associated	tail	tail	Core	Firm-4	14	5.7377
Lactobacillus mellis	244	POORLY CHARACTERIZED	Unknown (S, No Hits)	Unknown function (S)	unknown function	Core	Firm-4	32	13.1148
Lactobacillus mellis	244	PHAGE	Phage-associated	not_viral	not_viral	Core	Firm-4	3	1.22951
Lactobacillus mellis	244	PHAGE	Phage-associated	unknown function	unknown function	Core	Firm-4	2	0.819672
Lactobacillus mellis	244	POORLY CHARACTERIZED	Unknown (S, No Hits)	No hits (0)	other	Core	Firm-4	1	0.409836
Lactobacillus mellis	244	POORLY CHARACTERIZED	Unknown (S, No Hits)	Unknown function (S)	not_viral	Core	Firm-4	21	8.60656
Lactobacillus mellis	244	PHAGE	Phage-associated	integration and excision	integration and excision	Core	Firm-4	1	0.409836
Lactobacillus melliventris	220	POORLY CHARACTERIZED	Unknown (S, No Hits)	No hits (0)	unknown function	Core	Firm-5	16	7.27273
Lactobacillus melliventris	220	POORLY CHARACTERIZED	Unknown (S, No Hits)	Unknown function (S)	other	Core	Firm-5	5	2.27273
Lactobacillus melliventris	220	PHAGE	Phage-associated	transcription regulation	transcription regulation	Core	Firm-5	14	6.36364
Lactobacillus melliventris	220	POORLY CHARACTERIZED	Unknown (S, No Hits)	No hits (0)	not_viral	Core	Firm-5	42	19.0909
Lactobacillus melliventris	220	POORLY CHARACTERIZED	Unknown (S, No Hits)	Unknown function (S)	unknown function	Core	Firm-5	19	8.63636
Lactobacillus melliventris	220	PHAGE	Phage moron, auxiliary metabolic gene and host takeover	moron, auxiliary metabolic gene and host takeover	moron, auxiliary metabolic gene and host takeover	Core	Firm-5	1	0.454545
Lactobacillus melliventris	220	PHAGE	Phage-associated	DNA, RNA and nucleotide metabolism	DNA, RNA and nucleotide metabolism	Core	Firm-5	28	12.7273
Lactobacillus melliventris	220	PHAGE	Phage-associated	unknown function	unknown function	Core	Firm-5	7	3.18182
Lactobacillus melliventris	220	POORLY CHARACTERIZED	Unknown (S, No Hits)	Unknown function (S)	not_viral	Core	Firm-5	13	5.90909
Lactobacillus melliventris	220	PHAGE	Phage-associated	head and packaging	head and packaging	Core	Firm-5	27	12.2727
Lactobacillus melliventris	220	PHAGE	Phage-associated	connector	connector	Core	Firm-5	12	5.45455
Lactobacillus melliventris	220	PHAGE	Phage-associated	tail	tail	Core	Firm-5	23	10.4545
Lactobacillus melliventris	220	PHAGE	Phage-associated	lysis	lysis	Core	Firm-5	9	4.09091
Lactobacillus melliventris	220	PHAGE	Phage-associated	integration and excision	integration and excision	Core	Firm-5	4	1.81818
Melissococcus plutonius	375	PHAGE	Phage-associated	tail	tail	Pathogen	Pathogen	45	12
Melissococcus plutonius	375	METABOLISM	Carbohydrate (G)	Carbohydrate (G)	unknown function	Pathogen	Pathogen	1	0.266667
Melissococcus plutonius	375	INFORMATION STORAGE AND PROCESSING	Translation (JO)	Translation (J)	other	Pathogen	Pathogen	1	0.266667
Melissococcus plutonius	375	POORLY CHARACTERIZED	Unknown (S, No Hits)	Unknown function (S)	not_viral	Pathogen	Pathogen	24	6.4
Melissococcus plutonius	375	PHAGE	Phage-associated	other	other	Pathogen	Pathogen	4	1.06667
Melissococcus plutonius	375	POORLY CHARACTERIZED	Unknown (S, No Hits)	Unknown (S, No Hits)	unknown function	Pathogen	Pathogen	1	0.266667
Melissococcus plutonius	375	INFORMATION STORAGE AND PROCESSING	Transcription (K)	Transcription (K)	not_viral	Pathogen	Pathogen	7	1.86667
Melissococcus plutonius	375	PHAGE	Phage-associated	head and packaging	head and packaging	Pathogen	Pathogen	48	12.8
Melissococcus plutonius	375	PHAGE	Phage-associated	lysis	lysis	Pathogen	Pathogen	14	3.73333
Melissococcus plutonius	375	PHAGE	Phage-associated	not_viral	not_viral	Pathogen	Pathogen	9	2.4
Melissococcus plutonius	375	CELLULAR PROCESSES AND SIGNALING	Signaling (DTNZU)	General transport (U)	unknown function	Pathogen	Pathogen	1	0.266667
Melissococcus plutonius	375	PHAGE	Phage moron, auxiliary metabolic gene and host takeover	moron, auxiliary metabolic gene and host takeover	moron, auxiliary metabolic gene and host takeover	Pathogen	Pathogen	7	1.86667
Melissococcus plutonius	375	PHAGE	Phage-associated	integration and excision	integration and excision	Pathogen	Pathogen	7	1.86667
Melissococcus plutonius	375	PHAGE	Phage-associated	DNA, RNA and nucleotide metabolism	DNA, RNA and nucleotide metabolism	Pathogen	Pathogen	30	8
Melissococcus plutonius	375	PHAGE	Phage-associated	connector	connector	Pathogen	Pathogen	13	3.46667
Melissococcus plutonius	375	PHAGE	Phage-associated	unknown function	unknown function	Pathogen	Pathogen	10	2.66667
Melissococcus plutonius	375	POORLY CHARACTERIZED	Unknown (S, No Hits)	No hits (0)	not_viral	Pathogen	Pathogen	68	18.1333
Melissococcus plutonius	375	PHAGE	Phage-associated	transcription regulation	transcription regulation	Pathogen	Pathogen	26	6.93333
Melissococcus plutonius	375	POORLY CHARACTERIZED	Unknown (S, No Hits)	Unknown function (S)	unknown function	Pathogen	Pathogen	47	12.5333
Melissococcus plutonius	375	CELLULAR PROCESSES AND SIGNALING	Membrane (MW)	Cell membrane (M)	not_viral	Pathogen	Pathogen	3	0.8
Melissococcus plutonius	375	METABOLISM	Carbohydrate (G)	Carbohydrate (G)	not_viral	Pathogen	Pathogen	2	0.533333
Melissococcus plutonius	375	METABOLISM	Inorganic ion (P)	Inorganic ion (P)	unknown function	Pathogen	Pathogen	1	0.266667
Melissococcus plutonius	375	POORLY CHARACTERIZED	Unknown (S, No Hits)	No hits (0)	unknown function	Pathogen	Pathogen	6	1.6
Paenibacillus larvae	5243	METABOLISM	Amino acid (E)	Amino acid (E)	not_viral	Pathogen	Pathogen	7	0.133511
Paenibacillus larvae	5243	METABOLISM	Inorganic ion (P)	Inorganic ion (P)	not_viral	Pathogen	Pathogen	3	0.0572191
Paenibacillus larvae	5243	PHAGE	Phage-associated	tail	tail	Pathogen	Pathogen	413	7.87717
Paenibacillus larvae	5243	INFORMATION STORAGE AND PROCESSING	Information processing (ALBY)	Replication, recombination, repair (L)	unknown function	Pathogen	Pathogen	5	0.0953652
Paenibacillus larvae	5243	CELLULAR PROCESSES AND SIGNALING	Signaling (DTNZU)	General transport (U)	not_viral	Pathogen	Pathogen	8	0.152584
Paenibacillus larvae	5243	INFORMATION STORAGE AND PROCESSING	Translation (JO)	Translation (J)	other	Pathogen	Pathogen	11	0.209804
Paenibacillus larvae	5243	PHAGE	Phage-associated	DNA, RNA and nucleotide metabolism	DNA, RNA and nucleotide metabolism	Pathogen	Pathogen	458	8.73546
Paenibacillus larvae	5243	CELLULAR PROCESSES AND SIGNALING	Signaling (DTNZU)	General transport (U)	unknown function	Pathogen	Pathogen	1	0.019073
Paenibacillus larvae	5243	CELLULAR PROCESSES AND SIGNALING	Defense (V)	Defense (V)	not_viral	Pathogen	Pathogen	1	0.019073
Paenibacillus larvae	5243	CELLULAR PROCESSES AND SIGNALING	Signaling (DTNZU)	Motility (N)	not_viral	Pathogen	Pathogen	2	0.0381461
Paenibacillus larvae	5243	PHAGE	Phage-associated	unknown function	unknown function	Pathogen	Pathogen	35	0.667557
Paenibacillus larvae	5243	POORLY CHARACTERIZED	Unknown (S, No Hits)	Unknown function (S)	not_viral	Pathogen	Pathogen	363	6.92352
Paenibacillus larvae	5243	INFORMATION STORAGE AND PROCESSING	Transcription (K)	Transcription (K)	not_viral	Pathogen	Pathogen	36	0.68663
Paenibacillus larvae	5243	CELLULAR PROCESSES AND SIGNALING	Membrane (MW)	Cell membrane (M)	other	Pathogen	Pathogen	1	0.019073
Paenibacillus larvae	5243	PHAGE	Phage-associated	connector	connector	Pathogen	Pathogen	141	2.6893
Paenibacillus larvae	5243	PHAGE	Phage moron, auxiliary metabolic gene and host takeover	moron, auxiliary metabolic gene and host takeover	moron, auxiliary metabolic gene and host takeover	Pathogen	Pathogen	153	2.91818
Paenibacillus larvae	5243	PHAGE	Phage-associated	head and packaging	head and packaging	Pathogen	Pathogen	432	8.23956
Paenibacillus larvae	5243	PHAGE	Phage-associated	not_viral	not_viral	Pathogen	Pathogen	20	0.381461
Paenibacillus larvae	5243	PHAGE	Phage-associated	lysis	lysis	Pathogen	Pathogen	171	3.26149
Paenibacillus larvae	5243	METABOLISM	Energy (C)	Energy (C)	not_viral	Pathogen	Pathogen	4	0.0762922
Paenibacillus larvae	5243	INFORMATION STORAGE AND PROCESSING	Transcription (K)	Transcription (K)	other	Pathogen	Pathogen	5	0.0953652
Paenibacillus larvae	5243	CELLULAR PROCESSES AND SIGNALING	Signaling (DTNZU)	Signal transd. (T)	unknown function	Pathogen	Pathogen	6	0.114438
Paenibacillus larvae	5243	INFORMATION STORAGE AND PROCESSING	Translation (JO)	Translation (J)	not_viral	Pathogen	Pathogen	2	0.0381461
Paenibacillus larvae	5243	CELLULAR PROCESSES AND SIGNALING	Signaling (DTNZU)	Signal transd. (T)	other	Pathogen	Pathogen	1	0.019073
Paenibacillus larvae	5243	INFORMATION STORAGE AND PROCESSING	Information processing (ALBY)	Replication, recombination, repair (L)	other	Pathogen	Pathogen	24	0.457753
Paenibacillus larvae	5243	CELLULAR PROCESSES AND SIGNALING	Translation (JO)	Posttranslational (O)	not_viral	Pathogen	Pathogen	1	0.019073
Paenibacillus larvae	5243	METABOLISM	Coenzyme (H)	Coenzyme (H)	not_viral	Pathogen	Pathogen	1	0.019073
Paenibacillus larvae	5243	METABOLISM	Nucleotide (F)	Nucleotide (F)	not_viral	Pathogen	Pathogen	2	0.0381461
Paenibacillus larvae	5243	METABOLISM	Secondary metabolite (Q)	Secondary metabolite (Q)	not_viral	Pathogen	Pathogen	5	0.0953652
Paenibacillus larvae	5243	POORLY CHARACTERIZED	Unknown (S, No Hits)	Unknown function (S)	other	Pathogen	Pathogen	108	2.05989
Paenibacillus larvae	5243	CELLULAR PROCESSES AND SIGNALING	Signaling (DTNZU)	Signal transd. (T)	not_viral	Pathogen	Pathogen	2	0.0381461
Paenibacillus larvae	5243	POORLY CHARACTERIZED	Unknown (S, No Hits)	Unknown (S, No Hits)	unknown function	Pathogen	Pathogen	7	0.133511
Paenibacillus larvae	5243	POORLY CHARACTERIZED	Unknown (S, No Hits)	No hits (0)	not_viral	Pathogen	Pathogen	981	18.7107
Paenibacillus larvae	5243	INFORMATION STORAGE AND PROCESSING	Information processing (ALBY)	Replication, recombination, repair (L)	not_viral	Pathogen	Pathogen	1	0.019073
Paenibacillus larvae	5243	METABOLISM	Carbohydrate (G)	Carbohydrate (G)	other	Pathogen	Pathogen	2	0.0381461
Paenibacillus larvae	5243	INFORMATION STORAGE AND PROCESSING	Transcription (K)	Transcription (K)	unknown function	Pathogen	Pathogen	8	0.152584
Paenibacillus larvae	5243	CELLULAR PROCESSES AND SIGNALING	Membrane (MW)	Cell membrane (M)	not_viral	Pathogen	Pathogen	3	0.0572191
Paenibacillus larvae	5243	PHAGE	Phage-associated	transcription regulation	transcription regulation	Pathogen	Pathogen	236	4.50124
Paenibacillus larvae	5243	CELLULAR PROCESSES AND SIGNALING	Translation (JO)	Posttranslational (O)	unknown function	Pathogen	Pathogen	11	0.209804
Paenibacillus larvae	5243	METABOLISM	Lipid (I)	Lipid (I)	not_viral	Pathogen	Pathogen	1	0.019073
Paenibacillus larvae	5243	PHAGE	Phage-associated	integration and excision	integration and excision	Pathogen	Pathogen	195	3.71924
Paenibacillus larvae	5243	POORLY CHARACTERIZED	Unknown (S, No Hits)	Unknown (S, No Hits)	not_viral	Pathogen	Pathogen	3	0.0572191
Paenibacillus larvae	5243	METABOLISM	Inorganic ion (P)	Inorganic ion (P)	unknown function	Pathogen	Pathogen	2	0.0381461
Paenibacillus larvae	5243	POORLY CHARACTERIZED	Unknown (S, No Hits)	No hits (0)	unknown function	Pathogen	Pathogen	352	6.71371
Paenibacillus larvae	5243	CELLULAR PROCESSES AND SIGNALING	Defense (V)	Defense (V)	unknown function	Pathogen	Pathogen	4	0.0762922
Paenibacillus larvae	5243	METABOLISM	Nucleotide (F)	Nucleotide (F)	unknown function	Pathogen	Pathogen	1	0.019073
Paenibacillus larvae	5243	POORLY CHARACTERIZED	Unknown (S, No Hits)	Unknown function (S)	unknown function	Pathogen	Pathogen	1013	19.321
Paenibacillus larvae	5243	METABOLISM	Inorganic ion (P)	Inorganic ion (P)	other	Pathogen	Pathogen	1	0.019073
Snodgrassella alvi	2027	METABOLISM	Coenzyme (H)	Coenzyme (H)	other	Core	Snodgrassella alvi	2	0.098668
Snodgrassella alvi	2027	PHAGE	Phage-associated	connector	connector	Core	Snodgrassella alvi	73	3.60138
Snodgrassella alvi	2027	METABOLISM	Nucleotide (F)	Nucleotide (F)	other	Core	Snodgrassella alvi	1	0.049334
Snodgrassella alvi	2027	POORLY CHARACTERIZED	Unknown (S, No Hits)	No hits (0)	not_viral	Core	Snodgrassella alvi	355	17.5136
Snodgrassella alvi	2027	PHAGE	Phage-associated	lysis	lysis	Core	Snodgrassella alvi	27	1.33202
Snodgrassella alvi	2027	INFORMATION STORAGE AND PROCESSING	Information processing (ALBY)	Replication, recombination, repair (L)	other	Core	Snodgrassella alvi	5	0.24667
Snodgrassella alvi	2027	PHAGE	Phage-associated	DNA, RNA and nucleotide metabolism	DNA, RNA and nucleotide metabolism	Core	Snodgrassella alvi	144	7.10409
Snodgrassella alvi	2027	PHAGE	Phage-associated	head and packaging	head and packaging	Core	Snodgrassella alvi	249	12.2842
Snodgrassella alvi	2027	PHAGE	Phage-associated	transcription regulation	transcription regulation	Core	Snodgrassella alvi	137	6.75876
Snodgrassella alvi	2027	POORLY CHARACTERIZED	Unknown (S, No Hits)	Unknown function (S)	not_viral	Core	Snodgrassella alvi	251	12.3828
Snodgrassella alvi	2027	POORLY CHARACTERIZED	Unknown (S, No Hits)	Unknown function (S)	other	Core	Snodgrassella alvi	14	0.690676
Snodgrassella alvi	2027	METABOLISM	Amino acid (E)	Amino acid (E)	unknown function	Core	Snodgrassella alvi	1	0.049334
Snodgrassella alvi	2027	INFORMATION STORAGE AND PROCESSING	Transcription (K)	Transcription (K)	unknown function	Core	Snodgrassella alvi	3	0.148002
Snodgrassella alvi	2027	POORLY CHARACTERIZED	Unknown (S, No Hits)	Unknown (S, No Hits)	not_viral	Core	Snodgrassella alvi	2	0.098668
Snodgrassella alvi	2027	CELLULAR PROCESSES AND SIGNALING	Translation (JO)	Posttranslational (O)	not_viral	Core	Snodgrassella alvi	1	0.049334
Snodgrassella alvi	2027	PHAGE	Phage moron, auxiliary metabolic gene and host takeover	moron, auxiliary metabolic gene and host takeover	moron, auxiliary metabolic gene and host takeover	Core	Snodgrassella alvi	66	3.25604
Snodgrassella alvi	2027	PHAGE	Phage-associated	integration and excision	integration and excision	Core	Snodgrassella alvi	23	1.13468
Snodgrassella alvi	2027	PHAGE	Phage-associated	not_viral	not_viral	Core	Snodgrassella alvi	5	0.24667
Snodgrassella alvi	2027	PHAGE	Phage-associated	tail	tail	Core	Snodgrassella alvi	331	16.3296
Snodgrassella alvi	2027	PHAGE	Phage-associated	unknown function	unknown function	Core	Snodgrassella alvi	2	0.098668
Snodgrassella alvi	2027	INFORMATION STORAGE AND PROCESSING	Information processing (ALBY)	Replication, recombination, repair (L)	unknown function	Core	Snodgrassella alvi	11	0.542674
Snodgrassella alvi	2027	POORLY CHARACTERIZED	Unknown (S, No Hits)	Unknown function (S)	unknown function	Core	Snodgrassella alvi	306	15.0962
Snodgrassella alvi	2027	POORLY CHARACTERIZED	Unknown (S, No Hits)	No hits (0)	unknown function	Core	Snodgrassella alvi	17	0.838678
Snodgrassella alvi	2027	INFORMATION STORAGE AND PROCESSING	Information processing (ALBY)	Replication, recombination, repair (L)	not_viral	Core	Snodgrassella alvi	1	0.049334
