# Supplementary material for: Characterization of prophages in bacterial genomes from the honey bee (Apis mellifera) gut microbiome
Source: PeerJ. 2023 Jun 9;11:e15383. doi: 10.7717/peerj.15383 (PMC10259446; doi:10.7717/peerj.15383)
Supplement: Table S7 [file peerj-11-15383-s008.xlsx]

## Sheet: TableS7-AMG_Morons
Bacterial Host	Phage_Sequence	Protein_ID	Classified_by_EggNOG_or_PHROGS	COGG_Number	EggNOG_Annotation	PHROGS_Number	PHROGS_Annotation	AMG_or_Moron
Paenibacillus larvae	AARF01000085.1||full	AARF01000085.1||full__00003	S	4QDAG		-	-	-
Paenibacillus larvae	AARF01000085.1||full	AARF01000085.1||full__00009	S	4QGFE		-	-	-
Paenibacillus larvae	AARF01000085.1||full	AARF01000085.1||full__00008	S	4QAIJ	C-5 cytosine-specific DNA methylase	-	-	-
Paenibacillus larvae	AARF01000085.1||full	AARF01000085.1||full__00007	S	COG1694	Mazg nucleotide pyrophosphohydrolase	-	-	-
Paenibacillus larvae	AARF01000085.1||full	AARF01000085.1||full__00010	Ph	-	-	phrog_19	DnaB-like replicative helicase	-
Paenibacillus larvae	AARF01000085.1||full	AARF01000085.1||full__00002	Ph	-	-	phrog_248	transcriptional activator	-
Paenibacillus larvae	AARF01000085.1||full	AARF01000085.1||full__00005	S	4QBPM		-	-	-
Paenibacillus larvae	AARF01000085.1||full	AARF01000085.1||full__00004	Ph	-	-	phrog_159	RuvC-like Holliday junction resolvase	-
Paenibacillus larvae	AARF01000085.1||full	AARF01000085.1||full__00001	Ph	-	-	phrog_497	toxin-antitoxin system HicB-like	Unspecified Moron
Paenibacillus larvae	AARF01000085.1||full	AARF01000085.1||full__00006	S	4QAXV	YopX protein	-	-	-
Paenibacillus larvae	AARF01000119.1||full	AARF01000119.1||full__00027	0			-	-	-
Paenibacillus larvae	AARF01000119.1||full	AARF01000119.1||full__00017	S	33MIG	unknown	-	-	-
Paenibacillus larvae	AARF01000119.1||full	AARF01000119.1||full__00023	Ph	-	-	phrog_6	baseplate wedge subunit	-
Paenibacillus larvae	AARF01000119.1||full	AARF01000119.1||full__00029	Ph	-	-	phrog_2429	involved in bacteriocin production or immunity	Unspecified Moron
Paenibacillus larvae	AARF01000119.1||full	AARF01000119.1||full__00021	S	33B66	Protein of unknown function (DUF2577)	-	-	-
Paenibacillus larvae	AARF01000119.1||full	AARF01000119.1||full__00028	S	2ZQ0A	unknown	-	-	-
Paenibacillus larvae	AARF01000119.1||full	AARF01000119.1||full__00008	Ph	-	-	phrog_132	head-tail adaptor	-
Paenibacillus larvae	AARF01000119.1||full	AARF01000119.1||full__00010	Ph	-	-	phrog_5	tail completion or Neck1 protein	-
Paenibacillus larvae	AARF01000119.1||full	AARF01000119.1||full__00003	Ph	-	-	phrog_115	minor head protein	-
Paenibacillus larvae	AARF01000119.1||full	AARF01000119.1||full__00001	Ph	-	-	phrog_3717	terminase large subunit	-
Paenibacillus larvae	AARF01000119.1||full	AARF01000119.1||full__00020	Ph	-	-	phrog_400	tail protein	-
Paenibacillus larvae	AARF01000119.1||full	AARF01000119.1||full__00030	Ph	-	-	phrog_3088	amidase	-
Paenibacillus larvae	AARF01000119.1||full	AARF01000119.1||full__00012	S	32FG6	unknown	-	-	-
Paenibacillus larvae	AARF01000119.1||full	AARF01000119.1||full__00011	S	32YNZ	unknown	-	-	-
Paenibacillus larvae	AARF01000119.1||full	AARF01000119.1||full__00009	Ph	-	-	phrog_615	head-tail adaptor	-
Paenibacillus larvae	AARF01000119.1||full	AARF01000119.1||full__00034	O	arCOG01308	Cell division protein 48, CDC48, domain 2	-	-	-
Paenibacillus larvae	AARF01000119.1||full	AARF01000119.1||full__00024	Ph	-	-	phrog_521	tail protein	-
Paenibacillus larvae	AARF01000119.1||full	AARF01000119.1||full__00006	Ph	-	-	phrog_29	major head protein	-
Paenibacillus larvae	AARF01000119.1||full	AARF01000119.1||full__00019	Ph	-	-	phrog_380	endolysin	-
Paenibacillus larvae	AARF01000119.1||full	AARF01000119.1||full__00022	Ph	-	-	phrog_120	baseplate wedge subunit	-
Paenibacillus larvae	AARF01000119.1||full	AARF01000119.1||full__00018	Ph	-	-	phrog_1068	tail length tape measure protein	-
Paenibacillus larvae	AARF01000119.1||full	AARF01000119.1||full__00005	Ph	-	-	phrog_909	major head protein	-
Paenibacillus larvae	AARF01000119.1||full	AARF01000119.1||full__00015	Ph	-	-	phrog_365	tail protein	-
Paenibacillus larvae	AARF01000119.1||full	AARF01000119.1||full__00033	Ph	-	-	phrog_1299	holin	-
Paenibacillus larvae	AARF01000119.1||full	AARF01000119.1||full__00025	S	33NU8	unknown	-	-	-
Paenibacillus larvae	AARF01000119.1||full	AARF01000119.1||full__00031	S	2Z99H	unknown	-	-	-
Paenibacillus larvae	AARF01000119.1||full	AARF01000119.1||full__00013	Ph	-	-	phrog_279	tail sheath	-
Paenibacillus larvae	AARF01000119.1||full	AARF01000119.1||full__00026	S	KOG1072	protein ubiquitination	-	-	-
Paenibacillus larvae	AARF01000119.1||full	AARF01000119.1||full__00014	Ph	-	-		NA	-
Paenibacillus larvae	AARF01000119.1||full	AARF01000119.1||full__00016	Ph	-	-	phrog_389	tail protein XkdN-like	-
Paenibacillus larvae	AARF01000119.1||full	AARF01000119.1||full__00002	Ph	-	-	phrog_64	portal protein	-
Paenibacillus larvae	AARF01000119.1||full	AARF01000119.1||full__00032	S	4QCCA		-	-	-
Paenibacillus larvae	AARF01000119.1||full	AARF01000119.1||full__00004	Ph	-	-	phrog_194	head scaffolding protein	-
Paenibacillus larvae	AARF01000119.1||full	AARF01000119.1||full__00007	0			-	-	-
Paenibacillus larvae	AARF01000123.1||full	AARF01000123.1||full__00023	S	2ZHNQ	unknown	-	-	-
Paenibacillus larvae	AARF01000123.1||full	AARF01000123.1||full__00020	Ph	-	-	phrog_10285	DNA polymerase	-
Paenibacillus larvae	AARF01000123.1||full	AARF01000123.1||full__00011	0			-	-	-
Paenibacillus larvae	AARF01000123.1||full	AARF01000123.1||full__00010	Ph	-	-	phrog_135	dUTPase	-
Paenibacillus larvae	AARF01000123.1||full	AARF01000123.1||full__00018	Ph	-	-	phrog_1706	CRISPR/Cas system associated	-
Paenibacillus larvae	AARF01000123.1||full	AARF01000123.1||full__00014	Ph	-	-	phrog_86	ribonucleoside diphosphate reductase small subunit	-
Paenibacillus larvae	AARF01000123.1||full	AARF01000123.1||full__00005	S	344MB	unknown	-	-	-
Paenibacillus larvae	AARF01000123.1||full	AARF01000123.1||full__00012	0			-	-	-
Paenibacillus larvae	AARF01000123.1||full	AARF01000123.1||full__00003	Ph	-	-	phrog_85	thymidylate synthase	-
Paenibacillus larvae	AARF01000123.1||full	AARF01000123.1||full__00013	0			-	-	-
Paenibacillus larvae	AARF01000123.1||full	AARF01000123.1||full__00002	S	344MR	unknown	-	-	-
Paenibacillus larvae	AARF01000123.1||full	AARF01000123.1||full__00021	0			-	-	-
Paenibacillus larvae	AARF01000123.1||full	AARF01000123.1||full__00024	S	4QE40		-	-	-
Paenibacillus larvae	AARF01000123.1||full	AARF01000123.1||full__00022	Ph	-	-	phrog_12241	DNA polymerase	-
Paenibacillus larvae	AARF01000123.1||full	AARF01000123.1||full__00004	0			-	-	-
Paenibacillus larvae	AARF01000123.1||full	AARF01000123.1||full__00007	0			-	-	-
Paenibacillus larvae	AARF01000123.1||full	AARF01000123.1||full__00001	S	4QH1I	kinase activity	-	-	-
Paenibacillus larvae	AARF01000123.1||full	AARF01000123.1||full__00006	0			-	-	-
Paenibacillus larvae	AARF01000123.1||full	AARF01000123.1||full__00017	Ph	-	-	phrog_159	RuvC-like Holliday junction resolvase	-
Paenibacillus larvae	AARF01000123.1||full	AARF01000123.1||full__00009	S	307HJ	unknown	-	-	-
Paenibacillus larvae	AARF01000123.1||full	AARF01000123.1||full__00015	Ph	-	-	phrog_84	ribonucleoside-diphosphate reductase large subunit	-
Paenibacillus larvae	AARF01000123.1||full	AARF01000123.1||full__00008	0			-	-	-
Paenibacillus larvae	AARF01000123.1||full	AARF01000123.1||full__00016	0			-	-	-
Paenibacillus larvae	AARF01000123.1||full	AARF01000123.1||full__00019	Ph	-	-	phrog_192	DNA polymerase exonuclease subunit	-
Paenibacillus larvae	AARF01000247.1||full	AARF01000247.1||full__00006	0			-	-	-
Paenibacillus larvae	AARF01000247.1||full	AARF01000247.1||full__00004	K	334GS	Transcriptional regulator	-	-	-
Paenibacillus larvae	AARF01000247.1||full	AARF01000247.1||full__00005	0			-	-	-
Paenibacillus larvae	AARF01000247.1||full	AARF01000247.1||full__00010	Ph	-	-	phrog_12312	virion structural protein	-
Paenibacillus larvae	AARF01000247.1||full	AARF01000247.1||full__00002	0			-	-	-
Paenibacillus larvae	AARF01000247.1||full	AARF01000247.1||full__00009	S	32KD7	XkdW protein	-	-	-
Paenibacillus larvae	AARF01000247.1||full	AARF01000247.1||full__00011	Ph	-	-	phrog_202	distal tail protein Dit	-
Paenibacillus larvae	AARF01000247.1||full	AARF01000247.1||full__00001	S	30CG0	unknown	-	-	-
Paenibacillus larvae	AARF01000247.1||full	AARF01000247.1||full__00008	Ph	-	-	phrog_199	holin	-
Paenibacillus larvae	AARF01000247.1||full	AARF01000247.1||full__00007	Ph	-	-	phrog_2742	endolysin	-
Paenibacillus larvae	AARF01000247.1||full	AARF01000247.1||full__00003	S	33IDB	unknown	-	-	-
Paenibacillus larvae	ADFW01000001.1||0_partial_1	ADFW01000001.1||0_partial_1__00113	0			-	-	-
Paenibacillus larvae	ADFW01000001.1||0_partial_1	ADFW01000001.1||0_partial_1__00061	Ph	-	-	phrog_3088	amidase	-
Paenibacillus larvae	ADFW01000001.1||0_partial_1	ADFW01000001.1||0_partial_1__00046	Ph	-	-	phrog_23	tail sheath	-
Paenibacillus larvae	ADFW01000001.1||0_partial_1	ADFW01000001.1||0_partial_1__00183	Ph	-	-	phrog_157	transposase	-
Paenibacillus larvae	ADFW01000001.1||0_partial_1	ADFW01000001.1||0_partial_1__00235	Ph	-	-	phrog_353	toxin	Unspecified Moron
Paenibacillus larvae	ADFW01000001.1||0_partial_1	ADFW01000001.1||0_partial_1__00130	T	COG2206	PFAM metal-dependent phosphohydrolase, HD sub domain	-	-	-
Paenibacillus larvae	ADFW01000001.1||0_partial_1	ADFW01000001.1||0_partial_1__00282	S	arCOG14908	ribonuclease	-	-	-
Paenibacillus larvae	ADFW01000001.1||0_partial_1	ADFW01000001.1||0_partial_1__00222	0			-	-	-
Paenibacillus larvae	ADFW01000001.1||0_partial_1	ADFW01000001.1||0_partial_1__00284	S	2ZMSB	unknown	-	-	-
Paenibacillus larvae	ADFW01000001.1||0_partial_1	ADFW01000001.1||0_partial_1__00075	0			-	-	-
Paenibacillus larvae	ADFW01000001.1||0_partial_1	ADFW01000001.1||0_partial_1__00014	Ph	-	-	phrog_2780	RecT-like ssDNA annealing protein	-
Paenibacillus larvae	ADFW01000001.1||0_partial_1	ADFW01000001.1||0_partial_1__00253	Ph	-	-	phrog_538	minor tail protein	-
Paenibacillus larvae	ADFW01000001.1||0_partial_1	ADFW01000001.1||0_partial_1__00156	Ph	-	-	phrog_2780	RecT-like ssDNA annealing protein	-
Paenibacillus larvae	ADFW01000001.1||0_partial_1	ADFW01000001.1||0_partial_1__00256	S	4QEHA		-	-	-
Paenibacillus larvae	ADFW01000001.1||0_partial_1	ADFW01000001.1||0_partial_1__00255	S	4QCNP		-	-	-
Paenibacillus larvae	ADFW01000001.1||0_partial_1	ADFW01000001.1||0_partial_1__00152	0			-	-	-
Paenibacillus larvae	ADFW01000001.1||0_partial_1	ADFW01000001.1||0_partial_1__00112	0			-	-	-
Paenibacillus larvae	ADFW01000001.1||0_partial_1	ADFW01000001.1||0_partial_1__00050	Ph	-	-	phrog_46	baseplate hub	-
Paenibacillus larvae	ADFW01000001.1||0_partial_1	ADFW01000001.1||0_partial_1__00158	S	4QAII		-	-	-
Paenibacillus larvae	ADFW01000001.1||0_partial_1	ADFW01000001.1||0_partial_1__00103	0			-	-	-
Paenibacillus larvae	ADFW01000001.1||0_partial_1	ADFW01000001.1||0_partial_1__00277	S	4QCKR		-	-	-
Paenibacillus larvae	ADFW01000001.1||0_partial_1	ADFW01000001.1||0_partial_1__00178	Ph	-	-	phrog_1	integrase	-
Paenibacillus larvae	ADFW01000001.1||0_partial_1	ADFW01000001.1||0_partial_1__00115	0			-	-	-
Paenibacillus larvae	ADFW01000001.1||0_partial_1	ADFW01000001.1||0_partial_1__00218	Ph	-	-	phrog_112	Gp2.5-like ssDNA binding protein and ssDNA annealing protein	-
Paenibacillus larvae	ADFW01000001.1||0_partial_1	ADFW01000001.1||0_partial_1__00219	Ph	-	-	phrog_17	DNA polymerase	-
Paenibacillus larvae	ADFW01000001.1||0_partial_1	ADFW01000001.1||0_partial_1__00216	S	33P4N	unknown	-	-	-
Paenibacillus larvae	ADFW01000001.1||0_partial_1	ADFW01000001.1||0_partial_1__00062	Ph	-	-	phrog_1299	holin	-
Paenibacillus larvae	ADFW01000001.1||0_partial_1	ADFW01000001.1||0_partial_1__00011	S	4QE9S		-	-	-
Paenibacillus larvae	ADFW01000001.1||0_partial_1	ADFW01000001.1||0_partial_1__00236	Ph	-	-	phrog_497	toxin-antitoxin system HicB-like	Unspecified Moron
Paenibacillus larvae	ADFW01000001.1||0_partial_1	ADFW01000001.1||0_partial_1__00259	Ph	-	-	phrog_1299	holin	-
Paenibacillus larvae	ADFW01000001.1||0_partial_1	ADFW01000001.1||0_partial_1__00179	S	343AG	Putative mucin or carbohydrate-binding module	-	-	-
Paenibacillus larvae	ADFW01000001.1||0_partial_1	ADFW01000001.1||0_partial_1__00285	Ph	-	-	phrog_17477	anti-repressor	-
Paenibacillus larvae	ADFW01000001.1||0_partial_1	ADFW01000001.1||0_partial_1__00154	S	4QG2D		-	-	-
Paenibacillus larvae	ADFW01000001.1||0_partial_1	ADFW01000001.1||0_partial_1__00176	Ph	-	-	phrog_379	DNA binding protein	-
Paenibacillus larvae	ADFW01000001.1||0_partial_1	ADFW01000001.1||0_partial_1__00148	S	4QEAN		-	-	-
Paenibacillus larvae	ADFW01000001.1||0_partial_1	ADFW01000001.1||0_partial_1__00155	S	4QD9Q		-	-	-
Paenibacillus larvae	ADFW01000001.1||0_partial_1	ADFW01000001.1||0_partial_1__00101	0			-	-	-
Paenibacillus larvae	ADFW01000001.1||0_partial_1	ADFW01000001.1||0_partial_1__00163	S	4QAIJ	C-5 cytosine-specific DNA methylase	-	-	-
Paenibacillus larvae	ADFW01000001.1||0_partial_1	ADFW01000001.1||0_partial_1__00095	Ph	-	-	phrog_8429	NifU-like Fe-S cluster assembly protein	Unspecified Moron
Paenibacillus larvae	ADFW01000001.1||0_partial_1	ADFW01000001.1||0_partial_1__00010	S	306F8	unknown	-	-	-
Paenibacillus larvae	ADFW01000001.1||0_partial_1	ADFW01000001.1||0_partial_1__00226	0			-	-	-
Paenibacillus larvae	ADFW01000001.1||0_partial_1	ADFW01000001.1||0_partial_1__00271	0			-	-	-
Paenibacillus larvae	ADFW01000001.1||0_partial_1	ADFW01000001.1||0_partial_1__00274	Ph	-	-	phrog_7037	tail fiber protein	-
Paenibacillus larvae	ADFW01000001.1||0_partial_1	ADFW01000001.1||0_partial_1__00237	S	33G8I	unknown	-	-	-
Paenibacillus larvae	ADFW01000001.1||0_partial_1	ADFW01000001.1||0_partial_1__00043	Ph	-	-	phrog_27	tail completion or Neck1 protein	-
Paenibacillus larvae	ADFW01000001.1||0_partial_1	ADFW01000001.1||0_partial_1__00053	Ph	-	-	phrog_76	tail protein	-
Paenibacillus larvae	ADFW01000001.1||0_partial_1	ADFW01000001.1||0_partial_1__00215	0			-	-	-
Paenibacillus larvae	ADFW01000001.1||0_partial_1	ADFW01000001.1||0_partial_1__00167	S	4QDAG		-	-	-
Paenibacillus larvae	ADFW01000001.1||0_partial_1	ADFW01000001.1||0_partial_1__00159	Ph	-	-	phrog_2514	DnaD-like helicase loader	-
Paenibacillus larvae	ADFW01000001.1||0_partial_1	ADFW01000001.1||0_partial_1__00056	Ph	-	-	phrog_14404	baseplate protein	-
Paenibacillus larvae	ADFW01000001.1||0_partial_1	ADFW01000001.1||0_partial_1__00258	Ph	-	-	phrog_3088	amidase	-
Paenibacillus larvae	ADFW01000001.1||0_partial_1	ADFW01000001.1||0_partial_1__00257	Ph	-	-	phrog_2429	involved in bacteriocin production or immunity	Unspecified Moron
Paenibacillus larvae	ADFW01000001.1||0_partial_1	ADFW01000001.1||0_partial_1__00072	0			-	-	-
Paenibacillus larvae	ADFW01000001.1||0_partial_1	ADFW01000001.1||0_partial_1__00210	S	4QAIJ	C-5 cytosine-specific DNA methylase	-	-	-
Paenibacillus larvae	ADFW01000001.1||0_partial_1	ADFW01000001.1||0_partial_1__00102	0			-	-	-
Paenibacillus larvae	ADFW01000001.1||0_partial_1	ADFW01000001.1||0_partial_1__00168	Ph	-	-	phrog_248	transcriptional activator	-
Paenibacillus larvae	ADFW01000001.1||0_partial_1	ADFW01000001.1||0_partial_1__00173	Ph	-	-	phrog_2331	transposase	-
Paenibacillus larvae	ADFW01000001.1||0_partial_1	ADFW01000001.1||0_partial_1__00051	Ph	-	-	phrog_52	tail protein	-
Paenibacillus larvae	ADFW01000001.1||0_partial_1	ADFW01000001.1||0_partial_1__00151	S	4QE9S		-	-	-
Paenibacillus larvae	ADFW01000001.1||0_partial_1	ADFW01000001.1||0_partial_1__00153	S	4QG2D		-	-	-
Paenibacillus larvae	ADFW01000001.1||0_partial_1	ADFW01000001.1||0_partial_1__00040	Ph	-	-	phrog_29	major head protein	-
Paenibacillus larvae	ADFW01000001.1||0_partial_1	ADFW01000001.1||0_partial_1__00096	O	2QRGW	iron-sulfur cluster assembly	-	-	-
Paenibacillus larvae	ADFW01000001.1||0_partial_1	ADFW01000001.1||0_partial_1__00160	Ph	-	-	phrog_2514	DnaD-like helicase loader	-
Paenibacillus larvae	ADFW01000001.1||0_partial_1	ADFW01000001.1||0_partial_1__00086	K	COG4977	sequence-specific DNA binding	-	-	-
Paenibacillus larvae	ADFW01000001.1||0_partial_1	ADFW01000001.1||0_partial_1__00205	0			-	-	-
Paenibacillus larvae	ADFW01000001.1||0_partial_1	ADFW01000001.1||0_partial_1__00170	Ph	-	-	phrog_95	integrase	-
Paenibacillus larvae	ADFW01000001.1||0_partial_1	ADFW01000001.1||0_partial_1__00111	E	2QVCA	glycine amidinotransferase activity	-	-	Potential AMG
Paenibacillus larvae	ADFW01000001.1||0_partial_1	ADFW01000001.1||0_partial_1__00088	J	COG0182	Catalyzes the interconversion of methylthioribose-1- phosphate (MTR-1-P) into methylthioribulose-1-phosphate (MTRu-1- P)	-	-	-
Paenibacillus larvae	ADFW01000001.1||0_partial_1	ADFW01000001.1||0_partial_1__00233	Ph	-	-	phrog_36	transcriptional regulator	-
Paenibacillus larvae	ADFW01000001.1||0_partial_1	ADFW01000001.1||0_partial_1__00089	S	COG4857	Catalyzes the phosphorylation of methylthioribose into methylthioribose-1-phosphate	-	-	-
Paenibacillus larvae	ADFW01000001.1||0_partial_1	ADFW01000001.1||0_partial_1__00005	Ph	-	-	phrog_4	transcriptional repressor	-
Paenibacillus larvae	ADFW01000001.1||0_partial_1	ADFW01000001.1||0_partial_1__00251	Ph	-	-	phrog_1272	tail length tape measure protein	-
Paenibacillus larvae	ADFW01000001.1||0_partial_1	ADFW01000001.1||0_partial_1__00224	0			-	-	-
Paenibacillus larvae	ADFW01000001.1||0_partial_1	ADFW01000001.1||0_partial_1__00048	Ph	-	-	phrog_3140	tail assembly chaperone	-
Paenibacillus larvae	ADFW01000001.1||0_partial_1	ADFW01000001.1||0_partial_1__00038	Ph	-	-	phrog_94	head maturation protease	-
Paenibacillus larvae	ADFW01000001.1||0_partial_1	ADFW01000001.1||0_partial_1__00057	Ph	-	-	phrog_7037	tail fiber protein	-
Paenibacillus larvae	ADFW01000001.1||0_partial_1	ADFW01000001.1||0_partial_1__00174	Ph	-	-	phrog_2331	transposase	-
Paenibacillus larvae	ADFW01000001.1||0_partial_1	ADFW01000001.1||0_partial_1__00161	Ph	-	-	phrog_19	DnaB-like replicative helicase	-
Paenibacillus larvae	ADFW01000001.1||0_partial_1	ADFW01000001.1||0_partial_1__00217	Ph	-	-	phrog_69	exonuclease	-
Paenibacillus larvae	ADFW01000001.1||0_partial_1	ADFW01000001.1||0_partial_1__00162	S	4QGFE		-	-	-
Paenibacillus larvae	ADFW01000001.1||0_partial_1	ADFW01000001.1||0_partial_1__00228	S	32KGP	unknown	-	-	-
Paenibacillus larvae	ADFW01000001.1||0_partial_1	ADFW01000001.1||0_partial_1__00039	Ph	-	-	phrog_49	head decoration	-
Paenibacillus larvae	ADFW01000001.1||0_partial_1	ADFW01000001.1||0_partial_1__00100	S	33VJF	unknown	-	-	-
Paenibacillus larvae	ADFW01000001.1||0_partial_1	ADFW01000001.1||0_partial_1__00169	0			-	-	-
Paenibacillus larvae	ADFW01000001.1||0_partial_1	ADFW01000001.1||0_partial_1__00017	Ph	-	-	phrog_2514	DnaD-like helicase loader	-
Paenibacillus larvae	ADFW01000001.1||0_partial_1	ADFW01000001.1||0_partial_1__00093	O	COG0719	Fe-S assembly protein	-	-	-
Paenibacillus larvae	ADFW01000001.1||0_partial_1	ADFW01000001.1||0_partial_1__00280	Ph	-	-	phrog_10624	NA	-
Paenibacillus larvae	ADFW01000001.1||0_partial_1	ADFW01000001.1||0_partial_1__00024	0			-	-	-
Paenibacillus larvae	ADFW01000001.1||0_partial_1	ADFW01000001.1||0_partial_1__00069	S	2ZQQ5	unknown	-	-	-
Paenibacillus larvae	ADFW01000001.1||0_partial_1	ADFW01000001.1||0_partial_1__00037	Ph	-	-	phrog_21	portal protein	-
Paenibacillus larvae	ADFW01000001.1||0_partial_1	ADFW01000001.1||0_partial_1__00045	S	33A8W	unknown	-	-	-
Paenibacillus larvae	ADFW01000001.1||0_partial_1	ADFW01000001.1||0_partial_1__00007	0			-	-	-
Paenibacillus larvae	ADFW01000001.1||0_partial_1	ADFW01000001.1||0_partial_1__00063	0			-	-	-
Paenibacillus larvae	ADFW01000001.1||0_partial_1	ADFW01000001.1||0_partial_1__00207	0			-	-	-
Paenibacillus larvae	ADFW01000001.1||0_partial_1	ADFW01000001.1||0_partial_1__00211	0			-	-	-
Paenibacillus larvae	ADFW01000001.1||0_partial_1	ADFW01000001.1||0_partial_1__00225	0			-	-	-
Paenibacillus larvae	ADFW01000001.1||0_partial_1	ADFW01000001.1||0_partial_1__00009	S	4QEAN		-	-	-
Paenibacillus larvae	ADFW01000001.1||0_partial_1	ADFW01000001.1||0_partial_1__00049	Ph	-	-	phrog_991	tail length tape measure protein	-
Paenibacillus larvae	ADFW01000001.1||0_partial_1	ADFW01000001.1||0_partial_1__00042	Ph	-	-	phrog_2551	minor tail protein	-
Paenibacillus larvae	ADFW01000001.1||0_partial_1	ADFW01000001.1||0_partial_1__00248	Ph	-	-	phrog_78	tail terminator	-
Paenibacillus larvae	ADFW01000001.1||0_partial_1	ADFW01000001.1||0_partial_1__00275	S	2ZIVE	unknown	-	-	-
Paenibacillus larvae	ADFW01000001.1||0_partial_1	ADFW01000001.1||0_partial_1__00171	S	4QBIH	recombinase activity	-	-	-
Paenibacillus larvae	ADFW01000001.1||0_partial_1	ADFW01000001.1||0_partial_1__00055	Ph	-	-	phrog_6	baseplate wedge subunit	-
Paenibacillus larvae	ADFW01000001.1||0_partial_1	ADFW01000001.1||0_partial_1__00036	Ph	-	-	phrog_118	head-tail adaptor	-
Paenibacillus larvae	ADFW01000001.1||0_partial_1	ADFW01000001.1||0_partial_1__00013	S	4QD9Q		-	-	-
Paenibacillus larvae	ADFW01000001.1||0_partial_1	ADFW01000001.1||0_partial_1__00029	Ph	-	-	phrog_248	transcriptional activator	-
Paenibacillus larvae	ADFW01000001.1||0_partial_1	ADFW01000001.1||0_partial_1__00081	S	COG2363	Small membrane protein	-	-	-
Paenibacillus larvae	ADFW01000001.1||0_partial_1	ADFW01000001.1||0_partial_1__00071	S	33BHJ	unknown	-	-	-
Paenibacillus larvae	ADFW01000001.1||0_partial_1	ADFW01000001.1||0_partial_1__00031	Ph	-	-	phrog_497	toxin-antitoxin system HicB-like	Unspecified Moron
Paenibacillus larvae	ADFW01000001.1||0_partial_1	ADFW01000001.1||0_partial_1__00204	0			-	-	-
Paenibacillus larvae	ADFW01000001.1||0_partial_1	ADFW01000001.1||0_partial_1__00097	Ph	-	-		NA	-
Paenibacillus larvae	ADFW01000001.1||0_partial_1	ADFW01000001.1||0_partial_1__00002	S	33GYU	unknown	-	-	-
Paenibacillus larvae	ADFW01000001.1||0_partial_1	ADFW01000001.1||0_partial_1__00184	Ph	-	-	phrog_2331	transposase	-
Paenibacillus larvae	ADFW01000001.1||0_partial_1	ADFW01000001.1||0_partial_1__00004	Ph	-	-	phrog_95	integrase	-
Paenibacillus larvae	ADFW01000001.1||0_partial_1	ADFW01000001.1||0_partial_1__00281	Q	arCOG03588	Methyltransferase	-	-	Potential AMG
Paenibacillus larvae	ADFW01000001.1||0_partial_1	ADFW01000001.1||0_partial_1__00232	S	33BW7	Protein of unknwon function (DUF3310)	-	-	-
Paenibacillus larvae	ADFW01000001.1||0_partial_1	ADFW01000001.1||0_partial_1__00054	Ph	-	-	phrog_43	baseplate wedge subunit	-
Paenibacillus larvae	ADFW01000001.1||0_partial_1	ADFW01000001.1||0_partial_1__00254	Ph	-	-	phrog_5339	virion structural protein	-
Paenibacillus larvae	ADFW01000001.1||0_partial_1	ADFW01000001.1||0_partial_1__00195	S	34AHR	Helix-turn-helix domain	-	-	-
Paenibacillus larvae	ADFW01000001.1||0_partial_1	ADFW01000001.1||0_partial_1__00223	S	4QAXV	YopX protein	-	-	-
Paenibacillus larvae	ADFW01000001.1||0_partial_1	ADFW01000001.1||0_partial_1__00272	Ph	-	-	phrog_14404	baseplate protein	-
Paenibacillus larvae	ADFW01000001.1||0_partial_1	ADFW01000001.1||0_partial_1__00260	0			-	-	-
Paenibacillus larvae	ADFW01000001.1||0_partial_1	ADFW01000001.1||0_partial_1__00186	Q	arCOG01791	Methyltransferase	-	-	Potential AMG
Paenibacillus larvae	ADFW01000001.1||0_partial_1	ADFW01000001.1||0_partial_1__00032	Ph	-	-	phrog_353	toxin	Unspecified Moron
Paenibacillus larvae	ADFW01000001.1||0_partial_1	ADFW01000001.1||0_partial_1__00172	0			-	-	-
Paenibacillus larvae	ADFW01000001.1||0_partial_1	ADFW01000001.1||0_partial_1__00187	S	arCOG00498	COG0491 Zn-dependent hydrolases, including glyoxylases	-	-	-
Paenibacillus larvae	ADFW01000001.1||0_partial_1	ADFW01000001.1||0_partial_1__00180	S	343AG	Putative mucin or carbohydrate-binding module	-	-	-
Paenibacillus larvae	ADFW01000001.1||0_partial_1	ADFW01000001.1||0_partial_1__00213	Ph	-	-	phrog_4681	antitoxin from a toxin-antitoxin system	Unspecified Moron
Paenibacillus larvae	ADFW01000001.1||0_partial_1	ADFW01000001.1||0_partial_1__00052	Ph	-	-	phrog_6142	baseplate assembly protein	-
Paenibacillus larvae	ADFW01000001.1||0_partial_1	ADFW01000001.1||0_partial_1__00212	0			-	-	-
Paenibacillus larvae	ADFW01000001.1||0_partial_1	ADFW01000001.1||0_partial_1__00267	S	331IF	unknown	-	-	-
Paenibacillus larvae	ADFW01000001.1||0_partial_1	ADFW01000001.1||0_partial_1__00129	Ph	-	-	phrog_2331	transposase	-
Paenibacillus larvae	ADFW01000001.1||0_partial_1	ADFW01000001.1||0_partial_1__00022	0			-	-	-
Paenibacillus larvae	ADFW01000001.1||0_partial_1	ADFW01000001.1||0_partial_1__00283	K	COG2732	(Barnase) inhibitor	-	-	-
Paenibacillus larvae	ADFW01000001.1||0_partial_1	ADFW01000001.1||0_partial_1__00191	Ph	-	-	phrog_8	transcriptional regulator	-
Paenibacillus larvae	ADFW01000001.1||0_partial_1	ADFW01000001.1||0_partial_1__00190	Ph	-	-	phrog_8	transcriptional regulator	-
Paenibacillus larvae	ADFW01000001.1||0_partial_1	ADFW01000001.1||0_partial_1__00044	Ph	-	-	phrog_2581	virion structural protein	-
Paenibacillus larvae	ADFW01000001.1||0_partial_1	ADFW01000001.1||0_partial_1__00165	S	4QBPM		-	-	-
Paenibacillus larvae	ADFW01000001.1||0_partial_1	ADFW01000001.1||0_partial_1__00249	Ph	-	-	phrog_88	major tail protein	-
Paenibacillus larvae	ADFW01000001.1||0_partial_1	ADFW01000001.1||0_partial_1__00196	S	4QEX6		-	-	-
Paenibacillus larvae	ADFW01000001.1||0_partial_1	ADFW01000001.1||0_partial_1__00076	0			-	-	-
Paenibacillus larvae	ADFW01000001.1||0_partial_1	ADFW01000001.1||0_partial_1__00240	Ph	-	-	phrog_361	terminase small subunit	-
Paenibacillus larvae	ADFW01000001.1||0_partial_1	ADFW01000001.1||0_partial_1__00133	F	arCOG02832	COG0737 5'-nucleotidase 2',3'-cyclic phosphodiesterase and related esterases	-	-	Potential AMG
Paenibacillus larvae	ADFW01000001.1||0_partial_1	ADFW01000001.1||0_partial_1__00199	S	4QC3C		-	-	-
Paenibacillus larvae	ADFW01000001.1||0_partial_1	ADFW01000001.1||0_partial_1__00221	S	2ZMF3	unknown	-	-	-
Paenibacillus larvae	ADFW01000001.1||0_partial_1	ADFW01000001.1||0_partial_1__00090	Ph	-	-	phrog_3636	DNA binding protein	-
Paenibacillus larvae	ADFW01000001.1||0_partial_1	ADFW01000001.1||0_partial_1__00262	0			-	-	-
Paenibacillus larvae	ADFW01000001.1||0_partial_1	ADFW01000001.1||0_partial_1__00192	S	331QR	unknown	-	-	-
Paenibacillus larvae	ADFW01000001.1||0_partial_1	ADFW01000001.1||0_partial_1__00074	S	COG0488	(ABC) transporter	-	-	-
Paenibacillus larvae	ADFW01000001.1||0_partial_1	ADFW01000001.1||0_partial_1__00033	L	COG0863	Belongs to the N(4) N(6)-methyltransferase family	-	-	-
Paenibacillus larvae	ADFW01000001.1||0_partial_1	ADFW01000001.1||0_partial_1__00098	Ph	-	-		NA	-
Paenibacillus larvae	ADFW01000001.1||0_partial_1	ADFW01000001.1||0_partial_1__00150	0			-	-	-
Paenibacillus larvae	ADFW01000001.1||0_partial_1	ADFW01000001.1||0_partial_1__00018	Ph	-	-	phrog_19	DnaB-like replicative helicase	-
Paenibacillus larvae	ADFW01000001.1||0_partial_1	ADFW01000001.1||0_partial_1__00263	0			-	-	-
Paenibacillus larvae	ADFW01000001.1||0_partial_1	ADFW01000001.1||0_partial_1__00125	S	COG3863	Permuted papain-like amidase enzyme, YaeF/YiiX, C92 family	-	-	-
Paenibacillus larvae	ADFW01000001.1||0_partial_1	ADFW01000001.1||0_partial_1__00279	Ph	-	-	phrog_12965	DNA binding protein	-
Paenibacillus larvae	ADFW01000001.1||0_partial_1	ADFW01000001.1||0_partial_1__00092	Ph	-	-	phrog_293	ABC transporter	Unspecified Moron
Paenibacillus larvae	ADFW01000001.1||0_partial_1	ADFW01000001.1||0_partial_1__00243	Ph	-	-	phrog_94	head maturation protease	-
Paenibacillus larvae	ADFW01000001.1||0_partial_1	ADFW01000001.1||0_partial_1__00181	S	343AG	Putative mucin or carbohydrate-binding module	-	-	-
Paenibacillus larvae	ADFW01000001.1||0_partial_1	ADFW01000001.1||0_partial_1__00041	0			-	-	-
Paenibacillus larvae	ADFW01000001.1||0_partial_1	ADFW01000001.1||0_partial_1__00001	0			-	-	-
Paenibacillus larvae	ADFW01000001.1||0_partial_1	ADFW01000001.1||0_partial_1__00185	C	COG0039	L-malate dehydrogenase activity	-	-	Potential AMG
Paenibacillus larvae	ADFW01000001.1||0_partial_1	ADFW01000001.1||0_partial_1__00084	S	332AG	unknown	-	-	-
Paenibacillus larvae	ADFW01000001.1||0_partial_1	ADFW01000001.1||0_partial_1__00142	P	COG3546	catalase activity	-	-	Potential AMG
Paenibacillus larvae	ADFW01000001.1||0_partial_1	ADFW01000001.1||0_partial_1__00273	Ph	-	-	phrog_7037	tail fiber protein	-
Paenibacillus larvae	ADFW01000001.1||0_partial_1	ADFW01000001.1||0_partial_1__00227	S	33C23	unknown	-	-	-
Paenibacillus larvae	ADFW01000001.1||0_partial_1	ADFW01000001.1||0_partial_1__00035	Ph	-	-	phrog_15	terminase large subunit	-
Paenibacillus larvae	ADFW01000001.1||0_partial_1	ADFW01000001.1||0_partial_1__00114	Ph	-	-	phrog_2331	transposase	-
Paenibacillus larvae	ADFW01000001.1||0_partial_1	ADFW01000001.1||0_partial_1__00264	0			-	-	-
Paenibacillus larvae	ADFW01000001.1||0_partial_1	ADFW01000001.1||0_partial_1__00068	S	33IDB	unknown	-	-	-
Paenibacillus larvae	ADFW01000001.1||0_partial_1	ADFW01000001.1||0_partial_1__00003	S	COG2719	SpoVR family	-	-	-
Paenibacillus larvae	ADFW01000001.1||0_partial_1	ADFW01000001.1||0_partial_1__00214	0			-	-	-
Paenibacillus larvae	ADFW01000001.1||0_partial_1	ADFW01000001.1||0_partial_1__00006	Ph	-	-	phrog_8	transcriptional regulator	-
Paenibacillus larvae	ADFW01000001.1||0_partial_1	ADFW01000001.1||0_partial_1__00078	S	arCOG01994	membrane	-	-	-
Paenibacillus larvae	ADFW01000001.1||0_partial_1	ADFW01000001.1||0_partial_1__00132	0			-	-	-
Paenibacillus larvae	ADFW01000001.1||0_partial_1	ADFW01000001.1||0_partial_1__00230	Ph	-	-	phrog_93	endonuclease	-
Paenibacillus larvae	ADFW01000001.1||0_partial_1	ADFW01000001.1||0_partial_1__00145	K	COG3655	Transcriptional regulator	-	-	-
Paenibacillus larvae	ADFW01000001.1||0_partial_1	ADFW01000001.1||0_partial_1__00166	Ph	-	-	phrog_159	RuvC-like Holliday junction resolvase	-
Paenibacillus larvae	ADFW01000001.1||0_partial_1	ADFW01000001.1||0_partial_1__00247	Ph	-	-	phrog_5	tail completion or Neck1 protein	-
Paenibacillus larvae	ADFW01000001.1||0_partial_1	ADFW01000001.1||0_partial_1__00245	Ph	-	-	phrog_40	head-tail adaptor Ad1	-
Paenibacillus larvae	ADFW01000001.1||0_partial_1	ADFW01000001.1||0_partial_1__00120	Ph	-	-	phrog_18811	toxin	Unspecified Moron
Paenibacillus larvae	ADFW01000001.1||0_partial_1	ADFW01000001.1||0_partial_1__00147	S	4QC3C		-	-	-
Paenibacillus larvae	ADFW01000001.1||0_partial_1	ADFW01000001.1||0_partial_1__00238	0			-	-	-
Paenibacillus larvae	ADFW01000001.1||0_partial_1	ADFW01000001.1||0_partial_1__00066	Ph	-	-	phrog_2331	transposase	-
Paenibacillus larvae	ADFW01000001.1||0_partial_1	ADFW01000001.1||0_partial_1__00080	S	COG2764	glyoxalase bleomycin resistance protein dioxygenase	-	-	-
Paenibacillus larvae	ADFW01000001.1||0_partial_1	ADFW01000001.1||0_partial_1__00023	S	33ART	YopX protein	-	-	-
Paenibacillus larvae	ADFW01000001.1||0_partial_1	ADFW01000001.1||0_partial_1__00269	P	COG2076	Multidrug Resistance protein	-	-	Potential AMG
Paenibacillus larvae	ADFW01000001.1||0_partial_1	ADFW01000001.1||0_partial_1__00188	Ph	-	-	phrog_1	integrase	-
Paenibacillus larvae	ADFW01000001.1||0_partial_1	ADFW01000001.1||0_partial_1__00149	Ph	-	-	phrog_130	anti-repressor Ant	-
Paenibacillus larvae	ADFW01000001.1||0_partial_1	ADFW01000001.1||0_partial_1__00109	Ph	-	-	phrog_157	transposase	-
Paenibacillus larvae	ADFW01000001.1||0_partial_1	ADFW01000001.1||0_partial_1__00268	K	arCOG02649	Bacterial regulatory proteins, tetR family	-	-	-
Paenibacillus larvae	ADFW01000001.1||0_partial_1	ADFW01000001.1||0_partial_1__00266	S	33CP1	unknown	-	-	-
Paenibacillus larvae	ADFW01000001.1||0_partial_1	ADFW01000001.1||0_partial_1__00091	S	COG4293	Protein conserved in bacteria	-	-	-
Paenibacillus larvae	ADFW01000001.1||0_partial_1	ADFW01000001.1||0_partial_1__00139	Ph	-	-	phrog_151	transposase	-
Paenibacillus larvae	ADFW01000001.1||0_partial_1	ADFW01000001.1||0_partial_1__00116	S	337YU	unknown	-	-	-
Paenibacillus larvae	ADFW01000001.1||0_partial_1	ADFW01000001.1||0_partial_1__00193	S	348UT	unknown	-	-	-
Paenibacillus larvae	ADFW01000001.1||0_partial_1	ADFW01000001.1||0_partial_1__00239	Ph	-	-	phrog_119	HNH endonuclease	-
Paenibacillus larvae	ADFW01000001.1||0_partial_1	ADFW01000001.1||0_partial_1__00164	0			-	-	-
Paenibacillus larvae	ADFW01000001.1||0_partial_1	ADFW01000001.1||0_partial_1__00067	S	33R9M	unknown	-	-	-
Paenibacillus larvae	ADFW01000001.1||0_partial_1	ADFW01000001.1||0_partial_1__00087	I	COG1182	Catalyzes the reductive cleavage of azo bond in aromatic azo compounds to the corresponding amines. Requires NADH, but not NADPH, as an electron donor for its activity	-	-	Potential AMG
Paenibacillus larvae	ADFW01000001.1||0_partial_1	ADFW01000001.1||0_partial_1__00121	S	32UIX	unknown	-	-	-
Paenibacillus larvae	ADFW01000001.1||0_partial_1	ADFW01000001.1||0_partial_1__00104	Ph	-	-	phrog_1220	head protein	-
Paenibacillus larvae	ADFW01000001.1||0_partial_1	ADFW01000001.1||0_partial_1__00261	0			-	-	-
Paenibacillus larvae	ADFW01000001.1||0_partial_1	ADFW01000001.1||0_partial_1__00030	S	33BWX	unknown	-	-	-
Paenibacillus larvae	ADFW01000001.1||0_partial_1	ADFW01000001.1||0_partial_1__00021	0			-	-	-
Paenibacillus larvae	ADFW01000001.1||0_partial_1	ADFW01000001.1||0_partial_1__00209	0			-	-	-
Paenibacillus larvae	ADFW01000001.1||0_partial_1	ADFW01000001.1||0_partial_1__00208	0			-	-	-
Paenibacillus larvae	ADFW01000001.1||0_partial_1	ADFW01000001.1||0_partial_1__00276	Ph	-	-	phrog_3088	amidase	-
Paenibacillus larvae	ADFW01000001.1||0_partial_1	ADFW01000001.1||0_partial_1__00200	S	4QEAN		-	-	-
Paenibacillus larvae	ADFW01000001.1||0_partial_1	ADFW01000001.1||0_partial_1__00250	Ph	-	-	phrog_2115	tail protein	-
Paenibacillus larvae	ADFW01000001.1||0_partial_1	ADFW01000001.1||0_partial_1__00034	Ph	-	-	phrog_57	terminase small subunit	-
Paenibacillus larvae	ADFW01000001.1||0_partial_1	ADFW01000001.1||0_partial_1__00201	S	33J4E	unknown	-	-	-
Paenibacillus larvae	ADFW01000001.1||0_partial_1	ADFW01000001.1||0_partial_1__00134	S	2SQUZ	Bacitracin resistance protein BacA	-	-	Unspecified Moron
Paenibacillus larvae	ADFW01000001.1||0_partial_1	ADFW01000001.1||0_partial_1__00157	J	arCOG00502	PFAM beta-lactamase domain protein	-	-	-
Paenibacillus larvae	ADFW01000001.1||0_partial_1	ADFW01000001.1||0_partial_1__00047	Ph	-	-	phrog_55	head closure	-
Paenibacillus larvae	ADFW01000001.1||0_partial_1	ADFW01000001.1||0_partial_1__00206	0			-	-	-
Paenibacillus larvae	ADFW01000001.1||0_partial_1	ADFW01000001.1||0_partial_1__00270	Ph	-	-	phrog_1395	quaternary ammonium compound-resistance protein QacE	Unspecified Moron
Paenibacillus larvae	ADFW01000001.1||0_partial_1	ADFW01000001.1||0_partial_1__00026	Ph	-	-	phrog_159	RuvC-like Holliday junction resolvase	-
Paenibacillus larvae	ADFW01000001.1||0_partial_1	ADFW01000001.1||0_partial_1__00246	Ph	-	-	phrog_25	head closure Hc1	-
Paenibacillus larvae	ADFW01000001.1||0_partial_1	ADFW01000001.1||0_partial_1__00182	0			-	-	-
Paenibacillus larvae	ADFW01000001.1||0_partial_1	ADFW01000001.1||0_partial_1__00244	Ph	-	-	phrog_10	major head protein	-
Paenibacillus larvae	ADFW01000001.1||0_partial_1	ADFW01000001.1||0_partial_1__00110	S	301EI	STAS-like domain of unknown function (DUF4325)	-	-	-
Paenibacillus larvae	ADFW01000001.1||0_partial_1	ADFW01000001.1||0_partial_1__00118	Ph	-	-	phrog_18811	toxin	Unspecified Moron
Paenibacillus larvae	ADFW01000001.1||0_partial_1	ADFW01000001.1||0_partial_1__00265	0			-	-	-
Paenibacillus larvae	ADFW01000001.1||0_partial_1	ADFW01000001.1||0_partial_1__00229	Ph	-	-	phrog_256	DNA helicase	-
Paenibacillus larvae	ADFW01000001.1||0_partial_1	ADFW01000001.1||0_partial_1__00234	S	33BWX	unknown	-	-	-
Paenibacillus larvae	ADFW01000001.1||0_partial_1	ADFW01000001.1||0_partial_1__00065	0			-	-	-
Paenibacillus larvae	ADFW01000001.1||0_partial_1	ADFW01000001.1||0_partial_1__00202	0			-	-	-
Paenibacillus larvae	ADFW01000001.1||0_partial_1	ADFW01000001.1||0_partial_1__00058	S	4QCNP		-	-	-
Paenibacillus larvae	ADFW01000001.1||0_partial_1	ADFW01000001.1||0_partial_1__00073	S	COG2718	Belongs to the UPF0229 family	-	-	-
Paenibacillus larvae	ADFW01000001.1||0_partial_1	ADFW01000001.1||0_partial_1__00140	0			-	-	-
Paenibacillus larvae	ADFW01000001.1||0_partial_1	ADFW01000001.1||0_partial_1__00203	0			-	-	-
Paenibacillus larvae	ADFW01000001.1||0_partial_1	ADFW01000001.1||0_partial_1__00194	Ph	-	-	phrog_373	anti-repressor	-
Paenibacillus larvae	ADFW01000001.1||0_partial_1	ADFW01000001.1||0_partial_1__00146	0			-	-	-
Paenibacillus larvae	ADFW01000001.1||0_partial_1	ADFW01000001.1||0_partial_1__00123	Ph	-	-	phrog_157	transposase	-
Paenibacillus larvae	ADFW01000001.1||0_partial_1	ADFW01000001.1||0_partial_1__00252	Ph	-	-	phrog_33	distal tail protein Dit	-
Paenibacillus larvae	ADFW01000001.1||0_partial_1	ADFW01000001.1||0_partial_1__00015	J	arCOG00502	PFAM beta-lactamase domain protein	-	-	-
Paenibacillus larvae	ADFW01000001.1||0_partial_1	ADFW01000001.1||0_partial_1__00020	S	33I1I	unknown	-	-	-
Paenibacillus larvae	ADFW01000001.1||0_partial_1	ADFW01000001.1||0_partial_1__00079	0			-	-	-
Paenibacillus larvae	ADFW01000001.1||0_partial_1	ADFW01000001.1||0_partial_1__00019	S	4QGFE		-	-	-
Paenibacillus larvae	ADFW01000001.1||0_partial_1	ADFW01000001.1||0_partial_1__00085	S	COG3377	Domain of unknown function (DUF1805)	-	-	-
Paenibacillus larvae	ADFW01000001.1||0_partial_1	ADFW01000001.1||0_partial_1__00278	0			-	-	-
Paenibacillus larvae	ADFW01000001.1||0_partial_1	ADFW01000001.1||0_partial_1__00070	Ph	-	-	phrog_38199	membrane associated protein	Unspecified Moron
Paenibacillus larvae	ADFW01000001.1||0_partial_1	ADFW01000001.1||0_partial_1__00108	S	327FB	CENP-B N-terminal DNA-binding domain	-	-	-
Paenibacillus larvae	ADFW01000001.1||0_partial_1	ADFW01000001.1||0_partial_1__00177	K	COG1278	Cold shock	-	-	-
Paenibacillus larvae	ADFW01000001.1||0_partial_1	ADFW01000001.1||0_partial_1__00241	Ph	-	-	phrog_9	terminase large subunit	-
Paenibacillus larvae	ADFW01000001.1||0_partial_1	ADFW01000001.1||0_partial_1__00189	S	4QCCB	Pfam:Peptidase_M78	-	-	-
Paenibacillus larvae	ADFW01000001.1||0_partial_1	ADFW01000001.1||0_partial_1__00220	0			-	-	-
Paenibacillus larvae	ADFW01000001.1||0_partial_1	ADFW01000001.1||0_partial_1__00064	S	33C4R	unknown	-	-	-
Paenibacillus larvae	ADFW01000001.1||0_partial_1	ADFW01000001.1||0_partial_1__00126	0			-	-	-
Paenibacillus larvae	ADFW01000001.1||0_partial_1	ADFW01000001.1||0_partial_1__00117	0			-	-	-
Paenibacillus larvae	ADFW01000001.1||0_partial_1	ADFW01000001.1||0_partial_1__00094	S	COG2166	iron-sulfur cluster assembly	-	-	-
Paenibacillus larvae	ADFW01000001.1||0_partial_1	ADFW01000001.1||0_partial_1__00082	T	COG3852	Histidine kinase	-	-	-
Paenibacillus larvae	ADFW01000001.1||0_partial_1	ADFW01000001.1||0_partial_1__00136	S	arCOG00626	COG1253 Hemolysins and related proteins containing CBS domains	-	-	-
Paenibacillus larvae	ADFW01000001.1||0_partial_1	ADFW01000001.1||0_partial_1__00106	Ph	-	-	phrog_3088	amidase	-
Paenibacillus larvae	ADFW01000001.1||0_partial_1	ADFW01000001.1||0_partial_1__00143	Ph	-	-	phrog_95	integrase	-
Paenibacillus larvae	ADFW01000001.1||0_partial_1	ADFW01000001.1||0_partial_1__00141	S	32Y4N	CotJB protein	-	-	-
Paenibacillus larvae	ADFW01000001.1||0_partial_1	ADFW01000001.1||0_partial_1__00175	S	COG1272	protein, Hemolysin III	-	-	-
Paenibacillus larvae	ADFW01000001.1||0_partial_1	ADFW01000001.1||0_partial_1__00060	Ph	-	-	phrog_2429	involved in bacteriocin production or immunity	Unspecified Moron
Paenibacillus larvae	ADFW01000001.1||0_partial_1	ADFW01000001.1||0_partial_1__00122	Ph	-	-	phrog_151	transposase	-
Paenibacillus larvae	ADFW01000001.1||0_partial_1	ADFW01000001.1||0_partial_1__00119	Ph	-	-	phrog_18811	toxin	Unspecified Moron
Paenibacillus larvae	ADFW01000001.1||0_partial_1	ADFW01000001.1||0_partial_1__00077	0			-	-	-
Paenibacillus larvae	ADFW01000001.1||0_partial_1	ADFW01000001.1||0_partial_1__00138	Ph	-	-	phrog_157	transposase	-
Paenibacillus larvae	ADFW01000001.1||0_partial_1	ADFW01000001.1||0_partial_1__00012	S	4QG2D		-	-	-
Paenibacillus larvae	ADFW01000001.1||0_partial_1	ADFW01000001.1||0_partial_1__00059	S	4QEHA		-	-	-
Paenibacillus larvae	ADFW01000001.1||0_partial_1	ADFW01000001.1||0_partial_1__00008	S	4QC3C		-	-	-
Paenibacillus larvae	ADFW01000001.1||0_partial_1	ADFW01000001.1||0_partial_1__00242	Ph	-	-	phrog_12	portal protein	-
Paenibacillus larvae	ADFW01000001.1||0_partial_1	ADFW01000001.1||0_partial_1__00107	Ph	-	-	phrog_1299	holin	-
Paenibacillus larvae	ADFW01000001.1||0_partial_1	ADFW01000001.1||0_partial_1__00105	Ph	-	-	phrog_2429	involved in bacteriocin production or immunity	Unspecified Moron
Paenibacillus larvae	ADFW01000001.1||0_partial_1	ADFW01000001.1||0_partial_1__00197	0			-	-	-
Paenibacillus larvae	ADFW01000001.1||0_partial_1	ADFW01000001.1||0_partial_1__00025	S	4QBPM		-	-	-
Paenibacillus larvae	ADFW01000001.1||0_partial_1	ADFW01000001.1||0_partial_1__00137	Ph	-	-	phrog_157	transposase	-
Paenibacillus larvae	ADFW01000001.1||0_partial_1	ADFW01000001.1||0_partial_1__00027	Ph	-	-	phrog_154	replication initiation protein	-
Paenibacillus larvae	ADFW01000001.1||0_partial_1	ADFW01000001.1||0_partial_1__00099	S	32423	unknown	-	-	-
Paenibacillus larvae	ADFW01000001.1||0_partial_1	ADFW01000001.1||0_partial_1__00128	S	33XAK	unknown	-	-	-
Paenibacillus larvae	ADFW01000001.1||0_partial_1	ADFW01000001.1||0_partial_1__00231	Ph	-	-	phrog_62	DNA helicase	-
Paenibacillus larvae	ADFW01000001.1||0_partial_1	ADFW01000001.1||0_partial_1__00127	0			-	-	-
Paenibacillus larvae	ADFW01000001.1||0_partial_1	ADFW01000001.1||0_partial_1__00131	S	33A46	unknown	-	-	-
Paenibacillus larvae	ADFW01000001.1||0_partial_1	ADFW01000001.1||0_partial_1__00124	0			-	-	-
Paenibacillus larvae	ADFW01000001.1||0_partial_1	ADFW01000001.1||0_partial_1__00028	S	4QDAG		-	-	-
Paenibacillus larvae	ADFW01000001.1||0_partial_1	ADFW01000001.1||0_partial_1__00144	Ph	-	-	phrog_4	transcriptional repressor	-
Paenibacillus larvae	ADFW01000001.1||0_partial_1	ADFW01000001.1||0_partial_1__00135	P	arCOG00938	PFAM Radical SAM domain protein	-	-	Potential AMG
Paenibacillus larvae	ADFW01000001.1||0_partial_1	ADFW01000001.1||0_partial_1__00198	0			-	-	-
Paenibacillus larvae	ADFW01000001.1||0_partial_1	ADFW01000001.1||0_partial_1__00083	0			-	-	-
Paenibacillus larvae	ADFW01000001.1||0_partial_1	ADFW01000001.1||0_partial_1__00016	S	4QAII		-	-	-
Paenibacillus larvae	ADFW01000001.1||1_partial_1	ADFW01000001.1||1_partial_1__00135	S	2ZHNQ	unknown	-	-	-
Paenibacillus larvae	ADFW01000001.1||1_partial_1	ADFW01000001.1||1_partial_1__00140	Ph	-	-	phrog_20486	DNA binding protein	-
Paenibacillus larvae	ADFW01000001.1||1_partial_1	ADFW01000001.1||1_partial_1__00064	0			-	-	-
Paenibacillus larvae	ADFW01000001.1||1_partial_1	ADFW01000001.1||1_partial_1__00018	Ph	-	-	phrog_1407	major tail protein	-
Paenibacillus larvae	ADFW01000001.1||1_partial_1	ADFW01000001.1||1_partial_1__00095	Ph	-	-	phrog_10344	minor head protein	-
Paenibacillus larvae	ADFW01000001.1||1_partial_1	ADFW01000001.1||1_partial_1__00092	S	2ZJA0	unknown	-	-	-
Paenibacillus larvae	ADFW01000001.1||1_partial_1	ADFW01000001.1||1_partial_1__00107	0			-	-	-
Paenibacillus larvae	ADFW01000001.1||1_partial_1	ADFW01000001.1||1_partial_1__00120	Ph	-	-	phrog_1281	NA	-
Paenibacillus larvae	ADFW01000001.1||1_partial_1	ADFW01000001.1||1_partial_1__00009	Ph	-	-	phrog_2429	involved in bacteriocin production or immunity	Unspecified Moron
Paenibacillus larvae	ADFW01000001.1||1_partial_1	ADFW01000001.1||1_partial_1__00015	Ph	-	-	phrog_1272	tail length tape measure protein	-
Paenibacillus larvae	ADFW01000001.1||1_partial_1	ADFW01000001.1||1_partial_1__00128	Ph	-	-	phrog_1706	CRISPR/Cas system associated	-
Paenibacillus larvae	ADFW01000001.1||1_partial_1	ADFW01000001.1||1_partial_1__00014	Ph	-	-	phrog_33	distal tail protein Dit	-
Paenibacillus larvae	ADFW01000001.1||1_partial_1	ADFW01000001.1||1_partial_1__00073	Ph	-	-	phrog_1	integrase	-
Paenibacillus larvae	ADFW01000001.1||1_partial_1	ADFW01000001.1||1_partial_1__00134	Ph	-	-	phrog_12241	DNA polymerase	-
Paenibacillus larvae	ADFW01000001.1||1_partial_1	ADFW01000001.1||1_partial_1__00131	Ph	-	-	phrog_10285	DNA polymerase	-
Paenibacillus larvae	ADFW01000001.1||1_partial_1	ADFW01000001.1||1_partial_1__00060	0			-	-	-
Paenibacillus larvae	ADFW01000001.1||1_partial_1	ADFW01000001.1||1_partial_1__00146	0			-	-	-
Paenibacillus larvae	ADFW01000001.1||1_partial_1	ADFW01000001.1||1_partial_1__00118	S	4QH1I	kinase activity	-	-	-
Paenibacillus larvae	ADFW01000001.1||1_partial_1	ADFW01000001.1||1_partial_1__00006	0			-	-	-
Paenibacillus larvae	ADFW01000001.1||1_partial_1	ADFW01000001.1||1_partial_1__00008	Ph	-	-	phrog_3088	amidase	-
Paenibacillus larvae	ADFW01000001.1||1_partial_1	ADFW01000001.1||1_partial_1__00057	S	4QAIJ	C-5 cytosine-specific DNA methylase	-	-	-
Paenibacillus larvae	ADFW01000001.1||1_partial_1	ADFW01000001.1||1_partial_1__00045	S	34A9H	unknown	-	-	-
Paenibacillus larvae	ADFW01000001.1||1_partial_1	ADFW01000001.1||1_partial_1__00048	Ph	-	-	phrog_8097	exonuclease	-
Paenibacillus larvae	ADFW01000001.1||1_partial_1	ADFW01000001.1||1_partial_1__00013	Ph	-	-	phrog_538	minor tail protein	-
Paenibacillus larvae	ADFW01000001.1||1_partial_1	ADFW01000001.1||1_partial_1__00012	Ph	-	-	phrog_5339	virion structural protein	-
Paenibacillus larvae	ADFW01000001.1||1_partial_1	ADFW01000001.1||1_partial_1__00050	S	32RH5	unknown	-	-	-
Paenibacillus larvae	ADFW01000001.1||1_partial_1	ADFW01000001.1||1_partial_1__00051	S	4QFWZ	Pfam:DUF5406	-	-	-
Paenibacillus larvae	ADFW01000001.1||1_partial_1	ADFW01000001.1||1_partial_1__00133	Ph	-	-	phrog_12241	DNA polymerase	-
Paenibacillus larvae	ADFW01000001.1||1_partial_1	ADFW01000001.1||1_partial_1__00003	Ph	-	-	phrog_157	transposase	-
Paenibacillus larvae	ADFW01000001.1||1_partial_1	ADFW01000001.1||1_partial_1__00061	0			-	-	-
Paenibacillus larvae	ADFW01000001.1||1_partial_1	ADFW01000001.1||1_partial_1__00093	0			-	-	-
Paenibacillus larvae	ADFW01000001.1||1_partial_1	ADFW01000001.1||1_partial_1__00105	0			-	-	-
Paenibacillus larvae	ADFW01000001.1||1_partial_1	ADFW01000001.1||1_partial_1__00041	0			-	-	-
Paenibacillus larvae	ADFW01000001.1||1_partial_1	ADFW01000001.1||1_partial_1__00001	S	30JW8	unknown	-	-	-
Paenibacillus larvae	ADFW01000001.1||1_partial_1	ADFW01000001.1||1_partial_1__00130	0			-	-	-
Paenibacillus larvae	ADFW01000001.1||1_partial_1	ADFW01000001.1||1_partial_1__00114	Ph	-	-	phrog_3512	sigma factor	-
Paenibacillus larvae	ADFW01000001.1||1_partial_1	ADFW01000001.1||1_partial_1__00129	Ph	-	-	phrog_192	DNA polymerase exonuclease subunit	-
Paenibacillus larvae	ADFW01000001.1||1_partial_1	ADFW01000001.1||1_partial_1__00004	S	33V88	unknown	-	-	-
Paenibacillus larvae	ADFW01000001.1||1_partial_1	ADFW01000001.1||1_partial_1__00089	Ph	-	-	phrog_1533	tail length tape measure protein	-
Paenibacillus larvae	ADFW01000001.1||1_partial_1	ADFW01000001.1||1_partial_1__00119	S	344MR	unknown	-	-	-
Paenibacillus larvae	ADFW01000001.1||1_partial_1	ADFW01000001.1||1_partial_1__00056	0			-	-	-
Paenibacillus larvae	ADFW01000001.1||1_partial_1	ADFW01000001.1||1_partial_1__00063	S	33HHF	unknown	-	-	-
Paenibacillus larvae	ADFW01000001.1||1_partial_1	ADFW01000001.1||1_partial_1__00044	0			-	-	-
Paenibacillus larvae	ADFW01000001.1||1_partial_1	ADFW01000001.1||1_partial_1__00152	S	2ZPT8	unknown	-	-	-
Paenibacillus larvae	ADFW01000001.1||1_partial_1	ADFW01000001.1||1_partial_1__00068	Ph	-	-	phrog_373	anti-repressor	-
Paenibacillus larvae	ADFW01000001.1||1_partial_1	ADFW01000001.1||1_partial_1__00137	S	340HJ	unknown	-	-	-
Paenibacillus larvae	ADFW01000001.1||1_partial_1	ADFW01000001.1||1_partial_1__00123	0			-	-	-
Paenibacillus larvae	ADFW01000001.1||1_partial_1	ADFW01000001.1||1_partial_1__00069	0			-	-	-
Paenibacillus larvae	ADFW01000001.1||1_partial_1	ADFW01000001.1||1_partial_1__00066	0			-	-	-
Paenibacillus larvae	ADFW01000001.1||1_partial_1	ADFW01000001.1||1_partial_1__00036	S	33C23	unknown	-	-	-
Paenibacillus larvae	ADFW01000001.1||1_partial_1	ADFW01000001.1||1_partial_1__00034	S	33BW7	Protein of unknwon function (DUF3310)	-	-	-
Paenibacillus larvae	ADFW01000001.1||1_partial_1	ADFW01000001.1||1_partial_1__00002	Ph	-	-	phrog_151	transposase	-
Paenibacillus larvae	ADFW01000001.1||1_partial_1	ADFW01000001.1||1_partial_1__00049	Ph	-	-	phrog_93	endonuclease	-
Paenibacillus larvae	ADFW01000001.1||1_partial_1	ADFW01000001.1||1_partial_1__00005	S	33DAK	Putative amidase domain	-	-	-
Paenibacillus larvae	ADFW01000001.1||1_partial_1	ADFW01000001.1||1_partial_1__00037	0			-	-	-
Paenibacillus larvae	ADFW01000001.1||1_partial_1	ADFW01000001.1||1_partial_1__00125	Ph	-	-	phrog_135	dUTPase	-
Paenibacillus larvae	ADFW01000001.1||1_partial_1	ADFW01000001.1||1_partial_1__00104	Ph	-	-	phrog_38	terminase large subunit	-
Paenibacillus larvae	ADFW01000001.1||1_partial_1	ADFW01000001.1||1_partial_1__00078	S	33IDB	unknown	-	-	-
Paenibacillus larvae	ADFW01000001.1||1_partial_1	ADFW01000001.1||1_partial_1__00115	L	2S3P9	C-5 cytosine-specific DNA methylase	-	-	-
Paenibacillus larvae	ADFW01000001.1||1_partial_1	ADFW01000001.1||1_partial_1__00007	Ph	-	-	phrog_1299	holin	-
Paenibacillus larvae	ADFW01000001.1||1_partial_1	ADFW01000001.1||1_partial_1__00127	Ph	-	-	phrog_159	RuvC-like Holliday junction resolvase	-
Paenibacillus larvae	ADFW01000001.1||1_partial_1	ADFW01000001.1||1_partial_1__00112	Ph	-	-	phrog_4691	excisionase	-
Paenibacillus larvae	ADFW01000001.1||1_partial_1	ADFW01000001.1||1_partial_1__00071	Ph	-	-	phrog_2967	transcriptional regulator	-
Paenibacillus larvae	ADFW01000001.1||1_partial_1	ADFW01000001.1||1_partial_1__00052	Ph	-	-	phrog_62	DNA helicase	-
Paenibacillus larvae	ADFW01000001.1||1_partial_1	ADFW01000001.1||1_partial_1__00090	Ph	-	-	phrog_1533	tail length tape measure protein	-
Paenibacillus larvae	ADFW01000001.1||1_partial_1	ADFW01000001.1||1_partial_1__00029	S	33G8I	unknown	-	-	-
Paenibacillus larvae	ADFW01000001.1||1_partial_1	ADFW01000001.1||1_partial_1__00155	0			-	-	-
Paenibacillus larvae	ADFW01000001.1||1_partial_1	ADFW01000001.1||1_partial_1__00053	Ph	-	-	phrog_4681	antitoxin from a toxin-antitoxin system	Unspecified Moron
Paenibacillus larvae	ADFW01000001.1||1_partial_1	ADFW01000001.1||1_partial_1__00108	0			-	-	-
Paenibacillus larvae	ADFW01000001.1||1_partial_1	ADFW01000001.1||1_partial_1__00054	0			-	-	-
Paenibacillus larvae	ADFW01000001.1||1_partial_1	ADFW01000001.1||1_partial_1__00022	Ph	-	-	phrog_40	head-tail adaptor Ad1	-
Paenibacillus larvae	ADFW01000001.1||1_partial_1	ADFW01000001.1||1_partial_1__00116	L	COG4646	helicase C-terminal domain protein	-	-	-
Paenibacillus larvae	ADFW01000001.1||1_partial_1	ADFW01000001.1||1_partial_1__00043	0			-	-	-
Paenibacillus larvae	ADFW01000001.1||1_partial_1	ADFW01000001.1||1_partial_1__00122	S	344MB	unknown	-	-	-
Paenibacillus larvae	ADFW01000001.1||1_partial_1	ADFW01000001.1||1_partial_1__00086	S	32KD7	XkdW protein	-	-	-
Paenibacillus larvae	ADFW01000001.1||1_partial_1	ADFW01000001.1||1_partial_1__00039	S	2Z8BH	DNA N-6-adenine-methyltransferase	-	-	-
Paenibacillus larvae	ADFW01000001.1||1_partial_1	ADFW01000001.1||1_partial_1__00067	S	34AHR	Helix-turn-helix domain	-	-	-
Paenibacillus larvae	ADFW01000001.1||1_partial_1	ADFW01000001.1||1_partial_1__00136	0			-	-	-
Paenibacillus larvae	ADFW01000001.1||1_partial_1	ADFW01000001.1||1_partial_1__00047	Ph	-	-	phrog_7778	single strand DNA binding protein	-
Paenibacillus larvae	ADFW01000001.1||1_partial_1	ADFW01000001.1||1_partial_1__00032	S	33BWX	unknown	-	-	-
Paenibacillus larvae	ADFW01000001.1||1_partial_1	ADFW01000001.1||1_partial_1__00046	0			-	-	-
Paenibacillus larvae	ADFW01000001.1||1_partial_1	ADFW01000001.1||1_partial_1__00144	Ph	-	-	phrog_19	DnaB-like replicative helicase	-
Paenibacillus larvae	ADFW01000001.1||1_partial_1	ADFW01000001.1||1_partial_1__00026	Ph	-	-	phrog_9	terminase large subunit	-
Paenibacillus larvae	ADFW01000001.1||1_partial_1	ADFW01000001.1||1_partial_1__00151	S	303VI	unknown	-	-	-
Paenibacillus larvae	ADFW01000001.1||1_partial_1	ADFW01000001.1||1_partial_1__00023	Ph	-	-	phrog_10	major head protein	-
Paenibacillus larvae	ADFW01000001.1||1_partial_1	ADFW01000001.1||1_partial_1__00145	Ph	-	-	phrog_50	DnaC-like helicase loader	-
Paenibacillus larvae	ADFW01000001.1||1_partial_1	ADFW01000001.1||1_partial_1__00126	0			-	-	-
Paenibacillus larvae	ADFW01000001.1||1_partial_1	ADFW01000001.1||1_partial_1__00111	S	30DEH	Helix-turn-helix domain	-	-	-
Paenibacillus larvae	ADFW01000001.1||1_partial_1	ADFW01000001.1||1_partial_1__00081	0			-	-	-
Paenibacillus larvae	ADFW01000001.1||1_partial_1	ADFW01000001.1||1_partial_1__00017	0			-	-	-
Paenibacillus larvae	ADFW01000001.1||1_partial_1	ADFW01000001.1||1_partial_1__00042	S	4QAXV	YopX protein	-	-	-
Paenibacillus larvae	ADFW01000001.1||1_partial_1	ADFW01000001.1||1_partial_1__00033	Ph	-	-	phrog_36	transcriptional regulator	-
Paenibacillus larvae	ADFW01000001.1||1_partial_1	ADFW01000001.1||1_partial_1__00088	Ph	-	-	phrog_202	distal tail protein Dit	-
Paenibacillus larvae	ADFW01000001.1||1_partial_1	ADFW01000001.1||1_partial_1__00113	S	339UU	unknown	-	-	-
Paenibacillus larvae	ADFW01000001.1||1_partial_1	ADFW01000001.1||1_partial_1__00040	Ph	-	-	phrog_1252	DNA polymerase	-
Paenibacillus larvae	ADFW01000001.1||1_partial_1	ADFW01000001.1||1_partial_1__00035	Ph	-	-	phrog_864	DNA primase	-
Paenibacillus larvae	ADFW01000001.1||1_partial_1	ADFW01000001.1||1_partial_1__00102	Ph	-	-	phrog_533	portal protein	-
Paenibacillus larvae	ADFW01000001.1||1_partial_1	ADFW01000001.1||1_partial_1__00072	S	4QCCB	Pfam:Peptidase_M78	-	-	-
Paenibacillus larvae	ADFW01000001.1||1_partial_1	ADFW01000001.1||1_partial_1__00016	S	32XJQ	unknown	-	-	-
Paenibacillus larvae	ADFW01000001.1||1_partial_1	ADFW01000001.1||1_partial_1__00117	S	3427Z	unknown	-	-	-
Paenibacillus larvae	ADFW01000001.1||1_partial_1	ADFW01000001.1||1_partial_1__00148	0			-	-	-
Paenibacillus larvae	ADFW01000001.1||1_partial_1	ADFW01000001.1||1_partial_1__00065	S	4QC3C		-	-	-
Paenibacillus larvae	ADFW01000001.1||1_partial_1	ADFW01000001.1||1_partial_1__00080	K	334GS	Transcriptional regulator	-	-	-
Paenibacillus larvae	ADFW01000001.1||1_partial_1	ADFW01000001.1||1_partial_1__00110	Ph	-	-	phrog_2331	transposase	-
Paenibacillus larvae	ADFW01000001.1||1_partial_1	ADFW01000001.1||1_partial_1__00109	0			-	-	-
Paenibacillus larvae	ADFW01000001.1||1_partial_1	ADFW01000001.1||1_partial_1__00030	Ph	-	-	phrog_353	toxin	Unspecified Moron
Paenibacillus larvae	ADFW01000001.1||1_partial_1	ADFW01000001.1||1_partial_1__00121	0			-	-	-
Paenibacillus larvae	ADFW01000001.1||1_partial_1	ADFW01000001.1||1_partial_1__00062	0			-	-	-
Paenibacillus larvae	ADFW01000001.1||1_partial_1	ADFW01000001.1||1_partial_1__00027	Ph	-	-	phrog_361	terminase small subunit	-
Paenibacillus larvae	ADFW01000001.1||1_partial_1	ADFW01000001.1||1_partial_1__00082	0			-	-	-
Paenibacillus larvae	ADFW01000001.1||1_partial_1	ADFW01000001.1||1_partial_1__00139	S	33BWX	unknown	-	-	-
Paenibacillus larvae	ADFW01000001.1||1_partial_1	ADFW01000001.1||1_partial_1__00096	S	34B2Z	unknown	-	-	-
Paenibacillus larvae	ADFW01000001.1||1_partial_1	ADFW01000001.1||1_partial_1__00028	Ph	-	-	phrog_119	HNH endonuclease	-
Paenibacillus larvae	ADFW01000001.1||1_partial_1	ADFW01000001.1||1_partial_1__00156	S	33JGF	unknown	-	-	-
Paenibacillus larvae	ADFW01000001.1||1_partial_1	ADFW01000001.1||1_partial_1__00075	S	34C4Y	unknown	-	-	-
Paenibacillus larvae	ADFW01000001.1||1_partial_1	ADFW01000001.1||1_partial_1__00021	Ph	-	-	phrog_25	head closure Hc1	-
Paenibacillus larvae	ADFW01000001.1||1_partial_1	ADFW01000001.1||1_partial_1__00020	Ph	-	-	phrog_5	tail completion or Neck1 protein	-
Paenibacillus larvae	ADFW01000001.1||1_partial_1	ADFW01000001.1||1_partial_1__00091	0			-	-	-
Paenibacillus larvae	ADFW01000001.1||1_partial_1	ADFW01000001.1||1_partial_1__00059	0			-	-	-
Paenibacillus larvae	ADFW01000001.1||1_partial_1	ADFW01000001.1||1_partial_1__00132	0			-	-	-
Paenibacillus larvae	ADFW01000001.1||1_partial_1	ADFW01000001.1||1_partial_1__00098	S	33EYZ	unknown	-	-	-
Paenibacillus larvae	ADFW01000001.1||1_partial_1	ADFW01000001.1||1_partial_1__00031	Ph	-	-	phrog_497	toxin-antitoxin system HicB-like	Unspecified Moron
Paenibacillus larvae	ADFW01000001.1||1_partial_1	ADFW01000001.1||1_partial_1__00100	Ph	-	-	phrog_2303	head scaffolding protein	-
Paenibacillus larvae	ADFW01000001.1||1_partial_1	ADFW01000001.1||1_partial_1__00150	S	33J00	unknown	-	-	-
Paenibacillus larvae	ADFW01000001.1||1_partial_1	ADFW01000001.1||1_partial_1__00141	S	2ZJSU	unknown	-	-	-
Paenibacillus larvae	ADFW01000001.1||1_partial_1	ADFW01000001.1||1_partial_1__00124	0			-	-	-
Paenibacillus larvae	ADFW01000001.1||1_partial_1	ADFW01000001.1||1_partial_1__00024	Ph	-	-	phrog_94	head maturation protease	-
Paenibacillus larvae	ADFW01000001.1||1_partial_1	ADFW01000001.1||1_partial_1__00142	S	30DQ3	unknown	-	-	-
Paenibacillus larvae	ADFW01000001.1||1_partial_1	ADFW01000001.1||1_partial_1__00083	Ph	-	-	phrog_2742	endolysin	-
Paenibacillus larvae	ADFW01000001.1||1_partial_1	ADFW01000001.1||1_partial_1__00055	0			-	-	-
Paenibacillus larvae	ADFW01000001.1||1_partial_1	ADFW01000001.1||1_partial_1__00058	0			-	-	-
Paenibacillus larvae	ADFW01000001.1||1_partial_1	ADFW01000001.1||1_partial_1__00070	K	33B2D	Helix-turn-helix XRE-family like proteins	-	-	-
Paenibacillus larvae	ADFW01000001.1||1_partial_1	ADFW01000001.1||1_partial_1__00153	Ph	-	-	phrog_12720	DNA binding protein	-
Paenibacillus larvae	ADFW01000001.1||1_partial_1	ADFW01000001.1||1_partial_1__00149	S	3376A	Protein of unknown function (DUF3102)	-	-	-
Paenibacillus larvae	ADFW01000001.1||1_partial_1	ADFW01000001.1||1_partial_1__00106	Ph	-	-	phrog_2538	terminase small subunit	-
Paenibacillus larvae	ADFW01000001.1||1_partial_1	ADFW01000001.1||1_partial_1__00019	Ph	-	-	phrog_176	tail terminator	-
Paenibacillus larvae	ADFW01000001.1||1_partial_1	ADFW01000001.1||1_partial_1__00025	Ph	-	-	phrog_12	portal protein	-
Paenibacillus larvae	ADFW01000001.1||1_partial_1	ADFW01000001.1||1_partial_1__00077	0			-	-	-
Paenibacillus larvae	ADFW01000001.1||1_partial_1	ADFW01000001.1||1_partial_1__00099	Ph	-	-	phrog_212	major head protein	-
Paenibacillus larvae	ADFW01000001.1||1_partial_1	ADFW01000001.1||1_partial_1__00143	Ph	-	-	phrog_47	DNA primase	-
Paenibacillus larvae	ADFW01000001.1||1_partial_1	ADFW01000001.1||1_partial_1__00085	Ph	-	-	phrog_199	holin	-
Paenibacillus larvae	ADFW01000001.1||1_partial_1	ADFW01000001.1||1_partial_1__00084	Ph	-	-	phrog_2742	endolysin	-
Paenibacillus larvae	ADFW01000001.1||1_partial_1	ADFW01000001.1||1_partial_1__00076	S	30CG0	unknown	-	-	-
Paenibacillus larvae	ADFW01000001.1||1_partial_1	ADFW01000001.1||1_partial_1__00074	0			-	-	-
Paenibacillus larvae	ADFW01000001.1||1_partial_1	ADFW01000001.1||1_partial_1__00087	Ph	-	-	phrog_12312	virion structural protein	-
Paenibacillus larvae	ADFW01000001.1||1_partial_1	ADFW01000001.1||1_partial_1__00147	0			-	-	-
Paenibacillus larvae	ADFW01000001.1||1_partial_1	ADFW01000001.1||1_partial_1__00010	S	4QEHA		-	-	-
Paenibacillus larvae	ADFW01000001.1||1_partial_1	ADFW01000001.1||1_partial_1__00101	Ph	-	-	phrog_4611	minor head protein	-
Paenibacillus larvae	ADFW01000001.1||1_partial_1	ADFW01000001.1||1_partial_1__00011	S	4QCNP		-	-	-
Paenibacillus larvae	ADFW01000001.1||1_partial_1	ADFW01000001.1||1_partial_1__00103	Ph	-	-	phrog_38	terminase large subunit	-
Paenibacillus larvae	ADFW01000001.1||1_partial_1	ADFW01000001.1||1_partial_1__00079	S	33R9M	unknown	-	-	-
Paenibacillus larvae	ADFW01000001.1||1_partial_1	ADFW01000001.1||1_partial_1__00157	0			-	-	-
Paenibacillus larvae	ADFW01000001.1||1_partial_1	ADFW01000001.1||1_partial_1__00138	0			-	-	-
Paenibacillus larvae	ADFW01000001.1||1_partial_1	ADFW01000001.1||1_partial_1__00154	S	30R40	unknown	-	-	-
Paenibacillus larvae	ADFW01000001.1||1_partial_1	ADFW01000001.1||1_partial_1__00038	0			-	-	-
Paenibacillus larvae	ADFW01000001.1||1_partial_1	ADFW01000001.1||1_partial_1__00094	S	305KB	unknown	-	-	-
Paenibacillus larvae	ADFW01000001.1||1_partial_1	ADFW01000001.1||1_partial_1__00097	S	33IQ1	unknown	-	-	-
Paenibacillus larvae	ADFW01000001.1||2_partial_1	ADFW01000001.1||2_partial_1__00074	0			-	-	-
Paenibacillus larvae	ADFW01000001.1||2_partial_1	ADFW01000001.1||2_partial_1__00014	S	305KB	unknown	-	-	-
Paenibacillus larvae	ADFW01000001.1||2_partial_1	ADFW01000001.1||2_partial_1__00015	Ph	-	-	phrog_10344	minor head protein	-
Paenibacillus larvae	ADFW01000001.1||2_partial_1	ADFW01000001.1||2_partial_1__00087	Ph	-	-		NA	-
Paenibacillus larvae	ADFW01000001.1||2_partial_1	ADFW01000001.1||2_partial_1__00017	S	33IQ1	unknown	-	-	-
Paenibacillus larvae	ADFW01000001.1||2_partial_1	ADFW01000001.1||2_partial_1__00013	S	2ZJA0	unknown	-	-	-
Paenibacillus larvae	ADFW01000001.1||2_partial_1	ADFW01000001.1||2_partial_1__00076	S	33J00	unknown	-	-	-
Paenibacillus larvae	ADFW01000001.1||2_partial_1	ADFW01000001.1||2_partial_1__00054	Ph	-	-	phrog_159	RuvC-like Holliday junction resolvase	-
Paenibacillus larvae	ADFW01000001.1||2_partial_1	ADFW01000001.1||2_partial_1__00056	Ph	-	-	phrog_192	DNA polymerase exonuclease subunit	-
Paenibacillus larvae	ADFW01000001.1||2_partial_1	ADFW01000001.1||2_partial_1__00049	S	307HJ	unknown	-	-	-
Paenibacillus larvae	ADFW01000001.1||2_partial_1	ADFW01000001.1||2_partial_1__00030	S	33D1T	unknown	-	-	-
Paenibacillus larvae	ADFW01000001.1||2_partial_1	ADFW01000001.1||2_partial_1__00077	Ph	-	-	phrog_154	replication initiation protein	-
Paenibacillus larvae	ADFW01000001.1||2_partial_1	ADFW01000001.1||2_partial_1__00037	S	3427Z	unknown	-	-	-
Paenibacillus larvae	ADFW01000001.1||2_partial_1	ADFW01000001.1||2_partial_1__00085	Ph	-	-	phrog_130	anti-repressor Ant	-
Paenibacillus larvae	ADFW01000001.1||2_partial_1	ADFW01000001.1||2_partial_1__00053	Ph	-	-	phrog_84	ribonucleoside-diphosphate reductase large subunit	-
Paenibacillus larvae	ADFW01000001.1||2_partial_1	ADFW01000001.1||2_partial_1__00057	0			-	-	-
Paenibacillus larvae	ADFW01000001.1||2_partial_1	ADFW01000001.1||2_partial_1__00018	S	33EYZ	unknown	-	-	-
Paenibacillus larvae	ADFW01000001.1||2_partial_1	ADFW01000001.1||2_partial_1__00073	0			-	-	-
Paenibacillus larvae	ADFW01000001.1||2_partial_1	ADFW01000001.1||2_partial_1__00041	0			-	-	-
Paenibacillus larvae	ADFW01000001.1||2_partial_1	ADFW01000001.1||2_partial_1__00032	Ph	-	-	phrog_497	toxin-antitoxin system HicB-like	Unspecified Moron
Paenibacillus larvae	ADFW01000001.1||2_partial_1	ADFW01000001.1||2_partial_1__00065	0			-	-	-
Paenibacillus larvae	ADFW01000001.1||2_partial_1	ADFW01000001.1||2_partial_1__00001	S	32R5A	Spore coat protein	-	-	-
Paenibacillus larvae	ADFW01000001.1||2_partial_1	ADFW01000001.1||2_partial_1__00051	Ph	-	-	phrog_135	dUTPase	-
Paenibacillus larvae	ADFW01000001.1||2_partial_1	ADFW01000001.1||2_partial_1__00010	Ph	-	-	phrog_12312	virion structural protein	-
Paenibacillus larvae	ADFW01000001.1||2_partial_1	ADFW01000001.1||2_partial_1__00012	Ph	-	-	phrog_1533	tail length tape measure protein	-
Paenibacillus larvae	ADFW01000001.1||2_partial_1	ADFW01000001.1||2_partial_1__00052	Ph	-	-	phrog_86	ribonucleoside diphosphate reductase small subunit	-
Paenibacillus larvae	ADFW01000001.1||2_partial_1	ADFW01000001.1||2_partial_1__00020	Ph	-	-	phrog_2303	head scaffolding protein	-
Paenibacillus larvae	ADFW01000001.1||2_partial_1	ADFW01000001.1||2_partial_1__00055	Ph	-	-	phrog_1706	CRISPR/Cas system associated	-
Paenibacillus larvae	ADFW01000001.1||2_partial_1	ADFW01000001.1||2_partial_1__00043	0			-	-	-
Paenibacillus larvae	ADFW01000001.1||2_partial_1	ADFW01000001.1||2_partial_1__00059	0			-	-	-
Paenibacillus larvae	ADFW01000001.1||2_partial_1	ADFW01000001.1||2_partial_1__00028	0			-	-	-
Paenibacillus larvae	ADFW01000001.1||2_partial_1	ADFW01000001.1||2_partial_1__00021	Ph	-	-	phrog_4611	minor head protein	-
Paenibacillus larvae	ADFW01000001.1||2_partial_1	ADFW01000001.1||2_partial_1__00083	S	30R40	unknown	-	-	-
Paenibacillus larvae	ADFW01000001.1||2_partial_1	ADFW01000001.1||2_partial_1__00075	S	3376A	Protein of unknown function (DUF3102)	-	-	-
Paenibacillus larvae	ADFW01000001.1||2_partial_1	ADFW01000001.1||2_partial_1__00081	S	30EA8	unknown	-	-	-
Paenibacillus larvae	ADFW01000001.1||2_partial_1	ADFW01000001.1||2_partial_1__00046	0			-	-	-
Paenibacillus larvae	ADFW01000001.1||2_partial_1	ADFW01000001.1||2_partial_1__00078	S	2ZPT8	unknown	-	-	-
Paenibacillus larvae	ADFW01000001.1||2_partial_1	ADFW01000001.1||2_partial_1__00050	0			-	-	-
Paenibacillus larvae	ADFW01000001.1||2_partial_1	ADFW01000001.1||2_partial_1__00007	Ph	-	-	phrog_2742	endolysin	-
Paenibacillus larvae	ADFW01000001.1||2_partial_1	ADFW01000001.1||2_partial_1__00045	S	344MB	unknown	-	-	-
Paenibacillus larvae	ADFW01000001.1||2_partial_1	ADFW01000001.1||2_partial_1__00068	S	2ZJSU	unknown	-	-	-
Paenibacillus larvae	ADFW01000001.1||2_partial_1	ADFW01000001.1||2_partial_1__00048	0			-	-	-
Paenibacillus larvae	ADFW01000001.1||2_partial_1	ADFW01000001.1||2_partial_1__00044	0			-	-	-
Paenibacillus larvae	ADFW01000001.1||2_partial_1	ADFW01000001.1||2_partial_1__00002	S	34C4Y	unknown	-	-	-
Paenibacillus larvae	ADFW01000001.1||2_partial_1	ADFW01000001.1||2_partial_1__00031	S	2ZW04	unknown	-	-	-
Paenibacillus larvae	ADFW01000001.1||2_partial_1	ADFW01000001.1||2_partial_1__00024	0			-	-	-
Paenibacillus larvae	ADFW01000001.1||2_partial_1	ADFW01000001.1||2_partial_1__00038	S	4QH1I	kinase activity	-	-	-
Paenibacillus larvae	ADFW01000001.1||2_partial_1	ADFW01000001.1||2_partial_1__00022	Ph	-	-	phrog_533	portal protein	-
Paenibacillus larvae	ADFW01000001.1||2_partial_1	ADFW01000001.1||2_partial_1__00019	Ph	-	-	phrog_212	major head protein	-
Paenibacillus larvae	ADFW01000001.1||2_partial_1	ADFW01000001.1||2_partial_1__00058	Ph	-	-	phrog_10285	DNA polymerase	-
Paenibacillus larvae	ADFW01000001.1||2_partial_1	ADFW01000001.1||2_partial_1__00011	Ph	-	-	phrog_202	distal tail protein Dit	-
Paenibacillus larvae	ADFW01000001.1||2_partial_1	ADFW01000001.1||2_partial_1__00063	S	4QE40		-	-	-
Paenibacillus larvae	ADFW01000001.1||2_partial_1	ADFW01000001.1||2_partial_1__00016	S	34B2Z	unknown	-	-	-
Paenibacillus larvae	ADFW01000001.1||2_partial_1	ADFW01000001.1||2_partial_1__00064	S	340HJ	unknown	-	-	-
Paenibacillus larvae	ADFW01000001.1||2_partial_1	ADFW01000001.1||2_partial_1__00003	S	33ATC	Domain of unknown function (DUF4352)	-	-	-
Paenibacillus larvae	ADFW01000001.1||2_partial_1	ADFW01000001.1||2_partial_1__00027	0			-	-	-
Paenibacillus larvae	ADFW01000001.1||2_partial_1	ADFW01000001.1||2_partial_1__00004	S	30CG0	unknown	-	-	-
Paenibacillus larvae	ADFW01000001.1||2_partial_1	ADFW01000001.1||2_partial_1__00009	S	32KD7	XkdW protein	-	-	-
Paenibacillus larvae	ADFW01000001.1||2_partial_1	ADFW01000001.1||2_partial_1__00060	Ph	-	-	phrog_12241	DNA polymerase	-
Paenibacillus larvae	ADFW01000001.1||2_partial_1	ADFW01000001.1||2_partial_1__00036	L	COG4646	helicase C-terminal domain protein	-	-	-
Paenibacillus larvae	ADFW01000001.1||2_partial_1	ADFW01000001.1||2_partial_1__00035	Ph	-	-	phrog_3512	sigma factor	-
Paenibacillus larvae	ADFW01000001.1||2_partial_1	ADFW01000001.1||2_partial_1__00066	S	33BWX	unknown	-	-	-
Paenibacillus larvae	ADFW01000001.1||2_partial_1	ADFW01000001.1||2_partial_1__00079	0			-	-	-
Paenibacillus larvae	ADFW01000001.1||2_partial_1	ADFW01000001.1||2_partial_1__00084	0			-	-	-
Paenibacillus larvae	ADFW01000001.1||2_partial_1	ADFW01000001.1||2_partial_1__00082	0			-	-	-
Paenibacillus larvae	ADFW01000001.1||2_partial_1	ADFW01000001.1||2_partial_1__00005	0			-	-	-
Paenibacillus larvae	ADFW01000001.1||2_partial_1	ADFW01000001.1||2_partial_1__00033	Ph	-	-	phrog_353	toxin	Unspecified Moron
Paenibacillus larvae	ADFW01000001.1||2_partial_1	ADFW01000001.1||2_partial_1__00086	S	4QEX6		-	-	-
Paenibacillus larvae	ADFW01000001.1||2_partial_1	ADFW01000001.1||2_partial_1__00047	0			-	-	-
Paenibacillus larvae	ADFW01000001.1||2_partial_1	ADFW01000001.1||2_partial_1__00061	S	2ZHNQ	unknown	-	-	-
Paenibacillus larvae	ADFW01000001.1||2_partial_1	ADFW01000001.1||2_partial_1__00062	0			-	-	-
Paenibacillus larvae	ADFW01000001.1||2_partial_1	ADFW01000001.1||2_partial_1__00080	Ph	-	-	phrog_12720	DNA binding protein	-
Paenibacillus larvae	ADFW01000001.1||2_partial_1	ADFW01000001.1||2_partial_1__00069	S	30DQ3	unknown	-	-	-
Paenibacillus larvae	ADFW01000001.1||2_partial_1	ADFW01000001.1||2_partial_1__00039	S	344MR	unknown	-	-	-
Paenibacillus larvae	ADFW01000001.1||2_partial_1	ADFW01000001.1||2_partial_1__00070	Ph	-	-	phrog_47	DNA primase	-
Paenibacillus larvae	ADFW01000001.1||2_partial_1	ADFW01000001.1||2_partial_1__00029	0			-	-	-
Paenibacillus larvae	ADFW01000001.1||2_partial_1	ADFW01000001.1||2_partial_1__00071	Ph	-	-	phrog_19	DnaB-like replicative helicase	-
Paenibacillus larvae	ADFW01000001.1||2_partial_1	ADFW01000001.1||2_partial_1__00006	0			-	-	-
Paenibacillus larvae	ADFW01000001.1||2_partial_1	ADFW01000001.1||2_partial_1__00025	0			-	-	-
Paenibacillus larvae	ADFW01000001.1||2_partial_1	ADFW01000001.1||2_partial_1__00026	Ph	-	-	phrog_2538	terminase small subunit	-
Paenibacillus larvae	ADFW01000001.1||2_partial_1	ADFW01000001.1||2_partial_1__00034	S	339UU	unknown	-	-	-
Paenibacillus larvae	ADFW01000001.1||2_partial_1	ADFW01000001.1||2_partial_1__00008	Ph	-	-	phrog_199	holin	-
Paenibacillus larvae	ADFW01000001.1||2_partial_1	ADFW01000001.1||2_partial_1__00023	Ph	-	-	phrog_38	terminase large subunit	-
Paenibacillus larvae	ADFW01000001.1||2_partial_1	ADFW01000001.1||2_partial_1__00067	Ph	-	-	phrog_20486	DNA binding protein	-
Paenibacillus larvae	ADFW01000001.1||2_partial_1	ADFW01000001.1||2_partial_1__00072	Ph	-	-	phrog_50	DnaC-like helicase loader	-
Paenibacillus larvae	ADFW01000001.1||2_partial_1	ADFW01000001.1||2_partial_1__00042	Ph	-	-	phrog_1281	NA	-
Paenibacillus larvae	ADFW01000001.1||2_partial_1	ADFW01000001.1||2_partial_1__00040	0			-	-	-
Paenibacillus larvae	ADFW01000001.1||3_partial_1	ADFW01000001.1||3_partial_1__00009	0			-	-	-
Paenibacillus larvae	ADFW01000001.1||3_partial_1	ADFW01000001.1||3_partial_1__00028	Ph	-	-	phrog_10	major head protein	-
Paenibacillus larvae	ADFW01000001.1||3_partial_1	ADFW01000001.1||3_partial_1__00025	Ph	-	-	phrog_5	tail completion or Neck1 protein	-
Paenibacillus larvae	ADFW01000001.1||3_partial_1	ADFW01000001.1||3_partial_1__00016	S	4QEHA		-	-	-
Paenibacillus larvae	ADFW01000001.1||3_partial_1	ADFW01000001.1||3_partial_1__00029	Ph	-	-	phrog_80	head maturation protease	-
Paenibacillus larvae	ADFW01000001.1||3_partial_1	ADFW01000001.1||3_partial_1__00032	Ph	-	-	phrog_361	terminase small subunit	-
Paenibacillus larvae	ADFW01000001.1||3_partial_1	ADFW01000001.1||3_partial_1__00031	Ph	-	-	phrog_9	terminase large subunit	-
Paenibacillus larvae	ADFW01000001.1||3_partial_1	ADFW01000001.1||3_partial_1__00022	S	32J4N	unknown	-	-	-
Paenibacillus larvae	ADFW01000001.1||3_partial_1	ADFW01000001.1||3_partial_1__00057	S	2ZPV7	unknown	-	-	-
Paenibacillus larvae	ADFW01000001.1||3_partial_1	ADFW01000001.1||3_partial_1__00030	Ph	-	-	phrog_12	portal protein	-
Paenibacillus larvae	ADFW01000001.1||3_partial_1	ADFW01000001.1||3_partial_1__00024	Ph	-	-	phrog_78	tail terminator	-
Paenibacillus larvae	ADFW01000001.1||3_partial_1	ADFW01000001.1||3_partial_1__00013	Ph	-	-	phrog_1299	holin	-
Paenibacillus larvae	ADFW01000001.1||3_partial_1	ADFW01000001.1||3_partial_1__00059	S	4QCCB	Pfam:Peptidase_M78	-	-	-
Paenibacillus larvae	ADFW01000001.1||3_partial_1	ADFW01000001.1||3_partial_1__00044	S	4QDCH		-	-	-
Paenibacillus larvae	ADFW01000001.1||3_partial_1	ADFW01000001.1||3_partial_1__00001	0			-	-	-
Paenibacillus larvae	ADFW01000001.1||3_partial_1	ADFW01000001.1||3_partial_1__00020	Ph	-	-	phrog_33	distal tail protein Dit	-
Paenibacillus larvae	ADFW01000001.1||3_partial_1	ADFW01000001.1||3_partial_1__00006	0			-	-	-
Paenibacillus larvae	ADFW01000001.1||3_partial_1	ADFW01000001.1||3_partial_1__00008	0			-	-	-
Paenibacillus larvae	ADFW01000001.1||3_partial_1	ADFW01000001.1||3_partial_1__00054	S	4QC3C		-	-	-
Paenibacillus larvae	ADFW01000001.1||3_partial_1	ADFW01000001.1||3_partial_1__00026	Ph	-	-	phrog_1951	head-tail adaptor	-
Paenibacillus larvae	ADFW01000001.1||3_partial_1	ADFW01000001.1||3_partial_1__00005	K	COG3655	Transcriptional regulator	-	-	-
Paenibacillus larvae	ADFW01000001.1||3_partial_1	ADFW01000001.1||3_partial_1__00003	S	306J4	unknown	-	-	-
Paenibacillus larvae	ADFW01000001.1||3_partial_1	ADFW01000001.1||3_partial_1__00018	Ph	-	-	phrog_5339	virion structural protein	-
Paenibacillus larvae	ADFW01000001.1||3_partial_1	ADFW01000001.1||3_partial_1__00036	Ph	-	-	phrog_36	transcriptional regulator	-
Paenibacillus larvae	ADFW01000001.1||3_partial_1	ADFW01000001.1||3_partial_1__00023	Ph	-	-	phrog_88	major tail protein	-
Paenibacillus larvae	ADFW01000001.1||3_partial_1	ADFW01000001.1||3_partial_1__00056	Ph	-	-	phrog_63	anti-repressor Ant	-
Paenibacillus larvae	ADFW01000001.1||3_partial_1	ADFW01000001.1||3_partial_1__00058	Ph	-	-	phrog_8	transcriptional regulator	-
Paenibacillus larvae	ADFW01000001.1||3_partial_1	ADFW01000001.1||3_partial_1__00021	Ph	-	-	phrog_1533	tail length tape measure protein	-
Paenibacillus larvae	ADFW01000001.1||3_partial_1	ADFW01000001.1||3_partial_1__00042	0			-	-	-
Paenibacillus larvae	ADFW01000001.1||3_partial_1	ADFW01000001.1||3_partial_1__00015	Ph	-	-	phrog_2429	involved in bacteriocin production or immunity	Unspecified Moron
Paenibacillus larvae	ADFW01000001.1||3_partial_1	ADFW01000001.1||3_partial_1__00040	0			-	-	-
Paenibacillus larvae	ADFW01000001.1||3_partial_1	ADFW01000001.1||3_partial_1__00060	Ph	-	-	phrog_1	integrase	-
Paenibacillus larvae	ADFW01000001.1||3_partial_1	ADFW01000001.1||3_partial_1__00047	S	4QEW8		-	-	-
Paenibacillus larvae	ADFW01000001.1||3_partial_1	ADFW01000001.1||3_partial_1__00012	S	342AB	Clostridium epsilon toxin ETX/Bacillus mosquitocidal toxin MTX2	-	-	-
Paenibacillus larvae	ADFW01000001.1||3_partial_1	ADFW01000001.1||3_partial_1__00043	Ph	-	-	phrog_16	DNA helicase	-
Paenibacillus larvae	ADFW01000001.1||3_partial_1	ADFW01000001.1||3_partial_1__00002	S	32F6H	unknown	-	-	-
Paenibacillus larvae	ADFW01000001.1||3_partial_1	ADFW01000001.1||3_partial_1__00014	Ph	-	-	phrog_3088	amidase	-
Paenibacillus larvae	ADFW01000001.1||3_partial_1	ADFW01000001.1||3_partial_1__00037	Ph	-	-	phrog_351	RNA polymerase sigma factor	-
Paenibacillus larvae	ADFW01000001.1||3_partial_1	ADFW01000001.1||3_partial_1__00055	S	34AHR	Helix-turn-helix domain	-	-	-
Paenibacillus larvae	ADFW01000001.1||3_partial_1	ADFW01000001.1||3_partial_1__00050	Ph	-	-	phrog_4681	antitoxin from a toxin-antitoxin system	Unspecified Moron
Paenibacillus larvae	ADFW01000001.1||3_partial_1	ADFW01000001.1||3_partial_1__00051	0			-	-	-
Paenibacillus larvae	ADFW01000001.1||3_partial_1	ADFW01000001.1||3_partial_1__00019	Ph	-	-	phrog_538	minor tail protein	-
Paenibacillus larvae	ADFW01000001.1||3_partial_1	ADFW01000001.1||3_partial_1__00017	S	4QCNP		-	-	-
Paenibacillus larvae	ADFW01000001.1||3_partial_1	ADFW01000001.1||3_partial_1__00010	S	305RG	unknown	-	-	-
Paenibacillus larvae	ADFW01000001.1||3_partial_1	ADFW01000001.1||3_partial_1__00004	S	34APJ	unknown	-	-	-
Paenibacillus larvae	ADFW01000001.1||3_partial_1	ADFW01000001.1||3_partial_1__00007	0			-	-	-
Paenibacillus larvae	ADFW01000001.1||3_partial_1	ADFW01000001.1||3_partial_1__00033	Ph	-	-	phrog_119	HNH endonuclease	-
Paenibacillus larvae	ADFW01000001.1||3_partial_1	ADFW01000001.1||3_partial_1__00039	Ph	-	-	phrog_140	RusA-like Holliday junction resolvase	-
Paenibacillus larvae	ADFW01000001.1||3_partial_1	ADFW01000001.1||3_partial_1__00041	Ph	-	-	phrog_2597	DNA primase	-
Paenibacillus larvae	ADFW01000001.1||3_partial_1	ADFW01000001.1||3_partial_1__00053	0			-	-	-
Paenibacillus larvae	ADFW01000001.1||3_partial_1	ADFW01000001.1||3_partial_1__00027	S	331B9	unknown	-	-	-
Paenibacillus larvae	ADFW01000001.1||3_partial_1	ADFW01000001.1||3_partial_1__00048	S	2ZCCB	unknown	-	-	-
Paenibacillus larvae	ADFW01000001.1||3_partial_1	ADFW01000001.1||3_partial_1__00034	S	33MWH	unknown	-	-	-
Paenibacillus larvae	ADFW01000001.1||3_partial_1	ADFW01000001.1||3_partial_1__00038	S	30AXH	unknown	-	-	-
Paenibacillus larvae	ADFW01000001.1||3_partial_1	ADFW01000001.1||3_partial_1__00011	S	332TN	Cro/C1-type HTH DNA-binding domain	-	-	-
Paenibacillus larvae	ADFW01000001.1||3_partial_1	ADFW01000001.1||3_partial_1__00052	0			-	-	-
Paenibacillus larvae	ADFW01000001.1||3_partial_1	ADFW01000001.1||3_partial_1__00045	S	4QEX6		-	-	-
Paenibacillus larvae	ADFW01000001.1||3_partial_1	ADFW01000001.1||3_partial_1__00049	Ph	-	-	phrog_997	replication terminator	-
Paenibacillus larvae	ADFW01000001.1||3_partial_1	ADFW01000001.1||3_partial_1__00046	Ph	-	-	phrog_124	Sak4-like ssDNA annealing protein	-
Paenibacillus larvae	ADFW01000001.1||4_partial_1	ADFW01000001.1||4_partial_1__00006	0			-	-	-
Paenibacillus larvae	ADFW01000001.1||4_partial_1	ADFW01000001.1||4_partial_1__00082	0			-	-	-
Paenibacillus larvae	ADFW01000001.1||4_partial_1	ADFW01000001.1||4_partial_1__00005	0			-	-	-
Paenibacillus larvae	ADFW01000001.1||4_partial_1	ADFW01000001.1||4_partial_1__00009	0			-	-	-
Paenibacillus larvae	ADFW01000001.1||4_partial_1	ADFW01000001.1||4_partial_1__00111	Ph	-	-	phrog_2780	RecT-like ssDNA annealing protein	-
Paenibacillus larvae	ADFW01000001.1||4_partial_1	ADFW01000001.1||4_partial_1__00106	S	4QEAN		-	-	-
Paenibacillus larvae	ADFW01000001.1||4_partial_1	ADFW01000001.1||4_partial_1__00084	0			-	-	-
Paenibacillus larvae	ADFW01000001.1||4_partial_1	ADFW01000001.1||4_partial_1__00029	Ph	-	-	phrog_34	RusA-like Holliday junction resolvase	-
Paenibacillus larvae	ADFW01000001.1||4_partial_1	ADFW01000001.1||4_partial_1__00063	Ph	-	-	phrog_6	baseplate wedge subunit	-
Paenibacillus larvae	ADFW01000001.1||4_partial_1	ADFW01000001.1||4_partial_1__00107	Ph	-	-	phrog_130	anti-repressor Ant	-
Paenibacillus larvae	ADFW01000001.1||4_partial_1	ADFW01000001.1||4_partial_1__00014	0			-	-	-
Paenibacillus larvae	ADFW01000001.1||4_partial_1	ADFW01000001.1||4_partial_1__00065	S	33NU8	unknown	-	-	-
Paenibacillus larvae	ADFW01000001.1||4_partial_1	ADFW01000001.1||4_partial_1__00021	S	4QEW8		-	-	-
Paenibacillus larvae	ADFW01000001.1||4_partial_1	ADFW01000001.1||4_partial_1__00105	S	4QC3C		-	-	-
Paenibacillus larvae	ADFW01000001.1||4_partial_1	ADFW01000001.1||4_partial_1__00022	S	2ZA3S	unknown	-	-	-
Paenibacillus larvae	ADFW01000001.1||4_partial_1	ADFW01000001.1||4_partial_1__00011	0			-	-	-
Paenibacillus larvae	ADFW01000001.1||4_partial_1	ADFW01000001.1||4_partial_1__00035	0			-	-	-
Paenibacillus larvae	ADFW01000001.1||4_partial_1	ADFW01000001.1||4_partial_1__00026	Ph	-	-	phrog_50	DnaC-like helicase loader	-
Paenibacillus larvae	ADFW01000001.1||4_partial_1	ADFW01000001.1||4_partial_1__00104	S	4QDB9		-	-	-
Paenibacillus larvae	ADFW01000001.1||4_partial_1	ADFW01000001.1||4_partial_1__00061	S	33B66	Protein of unknown function (DUF2577)	-	-	-
Paenibacillus larvae	ADFW01000001.1||4_partial_1	ADFW01000001.1||4_partial_1__00074	O	arCOG01308	Cell division protein 48, CDC48, domain 2	-	-	-
Paenibacillus larvae	ADFW01000001.1||4_partial_1	ADFW01000001.1||4_partial_1__00070	Ph	-	-	phrog_3088	amidase	-
Paenibacillus larvae	ADFW01000001.1||4_partial_1	ADFW01000001.1||4_partial_1__00047	0			-	-	-
Paenibacillus larvae	ADFW01000001.1||4_partial_1	ADFW01000001.1||4_partial_1__00013	0			-	-	-
Paenibacillus larvae	ADFW01000001.1||4_partial_1	ADFW01000001.1||4_partial_1__00100	0			-	-	-
Paenibacillus larvae	ADFW01000001.1||4_partial_1	ADFW01000001.1||4_partial_1__00088	S	COG5660	integral membrane protein	-	-	-
Paenibacillus larvae	ADFW01000001.1||4_partial_1	ADFW01000001.1||4_partial_1__00064	Ph	-	-	phrog_521	tail protein	-
Paenibacillus larvae	ADFW01000001.1||4_partial_1	ADFW01000001.1||4_partial_1__00057	S	33MIG	unknown	-	-	-
Paenibacillus larvae	ADFW01000001.1||4_partial_1	ADFW01000001.1||4_partial_1__00069	Ph	-	-	phrog_2429	involved in bacteriocin production or immunity	Unspecified Moron
Paenibacillus larvae	ADFW01000001.1||4_partial_1	ADFW01000001.1||4_partial_1__00033	L	2SGCR	DNA methylase	-	-	-
Paenibacillus larvae	ADFW01000001.1||4_partial_1	ADFW01000001.1||4_partial_1__00071	S	2Z99H	unknown	-	-	-
Paenibacillus larvae	ADFW01000001.1||4_partial_1	ADFW01000001.1||4_partial_1__00023	Ph	-	-	phrog_1227	exonuclease	-
Paenibacillus larvae	ADFW01000001.1||4_partial_1	ADFW01000001.1||4_partial_1__00067	0			-	-	-
Paenibacillus larvae	ADFW01000001.1||4_partial_1	ADFW01000001.1||4_partial_1__00007	0			-	-	-
Paenibacillus larvae	ADFW01000001.1||4_partial_1	ADFW01000001.1||4_partial_1__00101	Ph	-	-	phrog_373	anti-repressor	-
Paenibacillus larvae	ADFW01000001.1||4_partial_1	ADFW01000001.1||4_partial_1__00050	Ph	-	-	phrog_5	tail completion or Neck1 protein	-
Paenibacillus larvae	ADFW01000001.1||4_partial_1	ADFW01000001.1||4_partial_1__00066	S	KOG1072	protein ubiquitination	-	-	-
Paenibacillus larvae	ADFW01000001.1||4_partial_1	ADFW01000001.1||4_partial_1__00008	S	4QC3C		-	-	-
Paenibacillus larvae	ADFW01000001.1||4_partial_1	ADFW01000001.1||4_partial_1__00031	0			-	-	-
Paenibacillus larvae	ADFW01000001.1||4_partial_1	ADFW01000001.1||4_partial_1__00062	Ph	-	-	phrog_120	baseplate wedge subunit	-
Paenibacillus larvae	ADFW01000001.1||4_partial_1	ADFW01000001.1||4_partial_1__00093	S	COG4089	membrane	-	-	-
Paenibacillus larvae	ADFW01000001.1||4_partial_1	ADFW01000001.1||4_partial_1__00077	Ph	-	-	phrog_10390	NA	-
Paenibacillus larvae	ADFW01000001.1||4_partial_1	ADFW01000001.1||4_partial_1__00054	Ph	-	-		NA	-
Paenibacillus larvae	ADFW01000001.1||4_partial_1	ADFW01000001.1||4_partial_1__00055	Ph	-	-	phrog_365	tail protein	-
Paenibacillus larvae	ADFW01000001.1||4_partial_1	ADFW01000001.1||4_partial_1__00024	Ph	-	-	phrog_7370	HNH endonuclease	-
Paenibacillus larvae	ADFW01000001.1||4_partial_1	ADFW01000001.1||4_partial_1__00039	0			-	-	-
Paenibacillus larvae	ADFW01000001.1||4_partial_1	ADFW01000001.1||4_partial_1__00025	Ph	-	-	phrog_9474	replication initiation protein	-
Paenibacillus larvae	ADFW01000001.1||4_partial_1	ADFW01000001.1||4_partial_1__00089	0			-	-	-
Paenibacillus larvae	ADFW01000001.1||4_partial_1	ADFW01000001.1||4_partial_1__00016	0			-	-	-
Paenibacillus larvae	ADFW01000001.1||4_partial_1	ADFW01000001.1||4_partial_1__00103	0			-	-	-
Paenibacillus larvae	ADFW01000001.1||4_partial_1	ADFW01000001.1||4_partial_1__00076	Ph	-	-	phrog_2439	transcriptional regulator	-
Paenibacillus larvae	ADFW01000001.1||4_partial_1	ADFW01000001.1||4_partial_1__00036	Ph	-	-	phrog_1190	RNA polymerase sigma factor	-
Paenibacillus larvae	ADFW01000001.1||4_partial_1	ADFW01000001.1||4_partial_1__00096	Ph	-	-	phrog_1	integrase	-
Paenibacillus larvae	ADFW01000001.1||4_partial_1	ADFW01000001.1||4_partial_1__00094	S	306DK	unknown	-	-	-
Paenibacillus larvae	ADFW01000001.1||4_partial_1	ADFW01000001.1||4_partial_1__00099	Ph	-	-	phrog_1877	DNA binding protein	-
Paenibacillus larvae	ADFW01000001.1||4_partial_1	ADFW01000001.1||4_partial_1__00083	S	COG0658	competence protein	-	-	-
Paenibacillus larvae	ADFW01000001.1||4_partial_1	ADFW01000001.1||4_partial_1__00056	Ph	-	-	phrog_389	tail protein XkdN-like	-
Paenibacillus larvae	ADFW01000001.1||4_partial_1	ADFW01000001.1||4_partial_1__00117	S	4QAIJ	C-5 cytosine-specific DNA methylase	-	-	-
Paenibacillus larvae	ADFW01000001.1||4_partial_1	ADFW01000001.1||4_partial_1__00017	0			-	-	-
Paenibacillus larvae	ADFW01000001.1||4_partial_1	ADFW01000001.1||4_partial_1__00027	0			-	-	-
Paenibacillus larvae	ADFW01000001.1||4_partial_1	ADFW01000001.1||4_partial_1__00015	Ph	-	-	phrog_1760	anti-repressor	-
Paenibacillus larvae	ADFW01000001.1||4_partial_1	ADFW01000001.1||4_partial_1__00086	Ph	-	-	phrog_293	ABC transporter	Unspecified Moron
Paenibacillus larvae	ADFW01000001.1||4_partial_1	ADFW01000001.1||4_partial_1__00068	S	2ZQ0A	unknown	-	-	-
Paenibacillus larvae	ADFW01000001.1||4_partial_1	ADFW01000001.1||4_partial_1__00046	Ph	-	-	phrog_29	major head protein	-
Paenibacillus larvae	ADFW01000001.1||4_partial_1	ADFW01000001.1||4_partial_1__00042	Ph	-	-	phrog_64	portal protein	-
Paenibacillus larvae	ADFW01000001.1||4_partial_1	ADFW01000001.1||4_partial_1__00081	E	2SHBN	Thermolysin metallopeptidase, alpha-helical domain	-	-	Potential AMG
Paenibacillus larvae	ADFW01000001.1||4_partial_1	ADFW01000001.1||4_partial_1__00059	Ph	-	-	phrog_380	endolysin	-
Paenibacillus larvae	ADFW01000001.1||4_partial_1	ADFW01000001.1||4_partial_1__00058	Ph	-	-	phrog_1068	tail length tape measure protein	-
Paenibacillus larvae	ADFW01000001.1||4_partial_1	ADFW01000001.1||4_partial_1__00097	Ph	-	-	phrog_4	transcriptional repressor	-
Paenibacillus larvae	ADFW01000001.1||4_partial_1	ADFW01000001.1||4_partial_1__00079	S	4QAY4		-	-	-
Paenibacillus larvae	ADFW01000001.1||4_partial_1	ADFW01000001.1||4_partial_1__00052	S	32FG6	unknown	-	-	-
Paenibacillus larvae	ADFW01000001.1||4_partial_1	ADFW01000001.1||4_partial_1__00085	V	COG0577	efflux transmembrane transporter activity	-	-	-
Paenibacillus larvae	ADFW01000001.1||4_partial_1	ADFW01000001.1||4_partial_1__00019	S	30R40	unknown	-	-	-
Paenibacillus larvae	ADFW01000001.1||4_partial_1	ADFW01000001.1||4_partial_1__00048	Ph	-	-	phrog_132	head-tail adaptor	-
Paenibacillus larvae	ADFW01000001.1||4_partial_1	ADFW01000001.1||4_partial_1__00080	S	4QC76	guanosine tetraphosphate metabolic process	-	-	-
Paenibacillus larvae	ADFW01000001.1||4_partial_1	ADFW01000001.1||4_partial_1__00049	Ph	-	-	phrog_615	head-tail adaptor	-
Paenibacillus larvae	ADFW01000001.1||4_partial_1	ADFW01000001.1||4_partial_1__00098	S	324BD	unknown	-	-	-
Paenibacillus larvae	ADFW01000001.1||4_partial_1	ADFW01000001.1||4_partial_1__00018	0			-	-	-
Paenibacillus larvae	ADFW01000001.1||4_partial_1	ADFW01000001.1||4_partial_1__00118	S	COG1694	Mazg nucleotide pyrophosphohydrolase	-	-	-
Paenibacillus larvae	ADFW01000001.1||4_partial_1	ADFW01000001.1||4_partial_1__00121	Ph	-	-	phrog_159	RuvC-like Holliday junction resolvase	-
Paenibacillus larvae	ADFW01000001.1||4_partial_1	ADFW01000001.1||4_partial_1__00051	S	32YNZ	unknown	-	-	-
Paenibacillus larvae	ADFW01000001.1||4_partial_1	ADFW01000001.1||4_partial_1__00028	Ph	-	-	phrog_3356	transposase	-
Paenibacillus larvae	ADFW01000001.1||4_partial_1	ADFW01000001.1||4_partial_1__00078	S	343YR	unknown	-	-	-
Paenibacillus larvae	ADFW01000001.1||4_partial_1	ADFW01000001.1||4_partial_1__00113	S	4QAII		-	-	-
Paenibacillus larvae	ADFW01000001.1||4_partial_1	ADFW01000001.1||4_partial_1__00038	0			-	-	-
Paenibacillus larvae	ADFW01000001.1||4_partial_1	ADFW01000001.1||4_partial_1__00030	0			-	-	-
Paenibacillus larvae	ADFW01000001.1||4_partial_1	ADFW01000001.1||4_partial_1__00087	S	2S97H	unknown	-	-	-
Paenibacillus larvae	ADFW01000001.1||4_partial_1	ADFW01000001.1||4_partial_1__00124	S	33BWX	unknown	-	-	-
Paenibacillus larvae	ADFW01000001.1||4_partial_1	ADFW01000001.1||4_partial_1__00122	S	4QDAG		-	-	-
Paenibacillus larvae	ADFW01000001.1||4_partial_1	ADFW01000001.1||4_partial_1__00045	Ph	-	-	phrog_909	major head protein	-
Paenibacillus larvae	ADFW01000001.1||4_partial_1	ADFW01000001.1||4_partial_1__00120	S	4QBPM		-	-	-
Paenibacillus larvae	ADFW01000001.1||4_partial_1	ADFW01000001.1||4_partial_1__00075	O	arCOG00702	Belongs to the peptidase S8 family	-	-	-
Paenibacillus larvae	ADFW01000001.1||4_partial_1	ADFW01000001.1||4_partial_1__00073	Ph	-	-	phrog_1299	holin	-
Paenibacillus larvae	ADFW01000001.1||4_partial_1	ADFW01000001.1||4_partial_1__00010	Ph	-	-	phrog_4681	antitoxin from a toxin-antitoxin system	Unspecified Moron
Paenibacillus larvae	ADFW01000001.1||4_partial_1	ADFW01000001.1||4_partial_1__00090	Ph	-	-	phrog_20214	clamp loader of DNA polymerase	-
Paenibacillus larvae	ADFW01000001.1||4_partial_1	ADFW01000001.1||4_partial_1__00012	Ph	-	-	phrog_130	anti-repressor Ant	-
Paenibacillus larvae	ADFW01000001.1||4_partial_1	ADFW01000001.1||4_partial_1__00060	Ph	-	-	phrog_400	tail protein	-
Paenibacillus larvae	ADFW01000001.1||4_partial_1	ADFW01000001.1||4_partial_1__00116	S	4QGFE		-	-	-
Paenibacillus larvae	ADFW01000001.1||4_partial_1	ADFW01000001.1||4_partial_1__00002	Ph	-	-	phrog_8	transcriptional regulator	-
Paenibacillus larvae	ADFW01000001.1||4_partial_1	ADFW01000001.1||4_partial_1__00102	0			-	-	-
Paenibacillus larvae	ADFW01000001.1||4_partial_1	ADFW01000001.1||4_partial_1__00040	Ph	-	-	phrog_509	terminase small subunit	-
Paenibacillus larvae	ADFW01000001.1||4_partial_1	ADFW01000001.1||4_partial_1__00041	Ph	-	-	phrog_3717	terminase large subunit	-
Paenibacillus larvae	ADFW01000001.1||4_partial_1	ADFW01000001.1||4_partial_1__00044	Ph	-	-	phrog_194	head scaffolding protein	-
Paenibacillus larvae	ADFW01000001.1||4_partial_1	ADFW01000001.1||4_partial_1__00119	S	4QAXV	YopX protein	-	-	-
Paenibacillus larvae	ADFW01000001.1||4_partial_1	ADFW01000001.1||4_partial_1__00001	Ph	-	-	phrog_1	integrase	-
Paenibacillus larvae	ADFW01000001.1||4_partial_1	ADFW01000001.1||4_partial_1__00053	Ph	-	-	phrog_279	tail sheath	-
Paenibacillus larvae	ADFW01000001.1||4_partial_1	ADFW01000001.1||4_partial_1__00109	S	4QG2D		-	-	-
Paenibacillus larvae	ADFW01000001.1||4_partial_1	ADFW01000001.1||4_partial_1__00112	J	arCOG00502	PFAM beta-lactamase domain protein	-	-	-
Paenibacillus larvae	ADFW01000001.1||4_partial_1	ADFW01000001.1||4_partial_1__00123	Ph	-	-	phrog_248	transcriptional activator	-
Paenibacillus larvae	ADFW01000001.1||4_partial_1	ADFW01000001.1||4_partial_1__00034	S	34A9H	unknown	-	-	-
Paenibacillus larvae	ADFW01000001.1||4_partial_1	ADFW01000001.1||4_partial_1__00020	S	313RY	Protein of unknown function (DUF1256)	-	-	-
Paenibacillus larvae	ADFW01000001.1||4_partial_1	ADFW01000001.1||4_partial_1__00037	S	33BWX	unknown	-	-	-
Paenibacillus larvae	ADFW01000001.1||4_partial_1	ADFW01000001.1||4_partial_1__00032	S	349N1	unknown	-	-	-
Paenibacillus larvae	ADFW01000001.1||4_partial_1	ADFW01000001.1||4_partial_1__00003	K	31YMI	Helix-turn-helix domain	-	-	-
Paenibacillus larvae	ADFW01000001.1||4_partial_1	ADFW01000001.1||4_partial_1__00004	Ph	-	-	phrog_63	anti-repressor Ant	-
Paenibacillus larvae	ADFW01000001.1||4_partial_1	ADFW01000001.1||4_partial_1__00114	Ph	-	-	phrog_2514	DnaD-like helicase loader	-
Paenibacillus larvae	ADFW01000001.1||4_partial_1	ADFW01000001.1||4_partial_1__00043	Ph	-	-	phrog_115	minor head protein	-
Paenibacillus larvae	ADFW01000001.1||4_partial_1	ADFW01000001.1||4_partial_1__00072	S	4QCCA		-	-	-
Paenibacillus larvae	ADFW01000001.1||4_partial_1	ADFW01000001.1||4_partial_1__00092	C	COG0680	Initiates the rapid degradation of small, acid-soluble proteins during spore germination	-	-	Potential AMG
Paenibacillus larvae	ADFW01000001.1||4_partial_1	ADFW01000001.1||4_partial_1__00095	J	KOG0462	GTPase activity	-	-	-
Paenibacillus larvae	ADFW01000001.1||4_partial_1	ADFW01000001.1||4_partial_1__00115	Ph	-	-	phrog_19	DnaB-like replicative helicase	-
Paenibacillus larvae	ADFW01000001.1||4_partial_1	ADFW01000001.1||4_partial_1__00110	S	4QD9Q		-	-	-
Paenibacillus larvae	ADFW01000001.1||4_partial_1	ADFW01000001.1||4_partial_1__00091	J	COG0268	Binds directly to 16S ribosomal RNA	-	-	-
Paenibacillus larvae	ADFW01000001.1||4_partial_1	ADFW01000001.1||4_partial_1__00108	S	4QE9S		-	-	-
Paenibacillus larvae	ADFW01000001.1||5_partial_1	ADFW01000001.1||5_partial_1__00005	Ph	-	-	phrog_38199	membrane associated protein	Unspecified Moron
Paenibacillus larvae	ADFW01000001.1||5_partial_1	ADFW01000001.1||5_partial_1__00009	0			-	-	-
Paenibacillus larvae	ADFW01000001.1||5_partial_1	ADFW01000001.1||5_partial_1__00004	S	2ZMSB	unknown	-	-	-
Paenibacillus larvae	ADFW01000001.1||5_partial_1	ADFW01000001.1||5_partial_1__00039	S	33G8I	unknown	-	-	-
Paenibacillus larvae	ADFW01000001.1||5_partial_1	ADFW01000001.1||5_partial_1__00008	0			-	-	-
Paenibacillus larvae	ADFW01000001.1||5_partial_1	ADFW01000001.1||5_partial_1__00002	S	2ZN3F	unknown	-	-	-
Paenibacillus larvae	ADFW01000001.1||5_partial_1	ADFW01000001.1||5_partial_1__00031	0			-	-	-
Paenibacillus larvae	ADFW01000001.1||5_partial_1	ADFW01000001.1||5_partial_1__00024	0			-	-	-
Paenibacillus larvae	ADFW01000001.1||5_partial_1	ADFW01000001.1||5_partial_1__00041	Ph	-	-	phrog_497	toxin-antitoxin system HicB-like	Unspecified Moron
Paenibacillus larvae	ADFW01000001.1||5_partial_1	ADFW01000001.1||5_partial_1__00033	Ph	-	-	phrog_12	portal protein	-
Paenibacillus larvae	ADFW01000001.1||5_partial_1	ADFW01000001.1||5_partial_1__00013	Ph	-	-	phrog_1299	holin	-
Paenibacillus larvae	ADFW01000001.1||5_partial_1	ADFW01000001.1||5_partial_1__00003	S	33BHJ	unknown	-	-	-
Paenibacillus larvae	ADFW01000001.1||5_partial_1	ADFW01000001.1||5_partial_1__00038	Ph	-	-	phrog_119	HNH endonuclease	-
Paenibacillus larvae	ADFW01000001.1||5_partial_1	ADFW01000001.1||5_partial_1__00023	S	32XJQ	unknown	-	-	-
Paenibacillus larvae	ADFW01000001.1||5_partial_1	ADFW01000001.1||5_partial_1__00010	S	305RG	unknown	-	-	-
Paenibacillus larvae	ADFW01000001.1||5_partial_1	ADFW01000001.1||5_partial_1__00028	Ph	-	-	phrog_25	head closure Hc1	-
Paenibacillus larvae	ADFW01000001.1||5_partial_1	ADFW01000001.1||5_partial_1__00007	0			-	-	-
Paenibacillus larvae	ADFW01000001.1||5_partial_1	ADFW01000001.1||5_partial_1__00036	Ph	-	-	phrog_10517	terminase large subunit	-
Paenibacillus larvae	ADFW01000001.1||5_partial_1	ADFW01000001.1||5_partial_1__00034	Ph	-	-	phrog_2699	terminase large subunit	-
Paenibacillus larvae	ADFW01000001.1||5_partial_1	ADFW01000001.1||5_partial_1__00006	K	COG3655	Transcriptional regulator	-	-	-
Paenibacillus larvae	ADFW01000001.1||5_partial_1	ADFW01000001.1||5_partial_1__00026	Ph	-	-	phrog_176	tail terminator	-
Paenibacillus larvae	ADFW01000001.1||5_partial_1	ADFW01000001.1||5_partial_1__00040	Ph	-	-	phrog_353	toxin	Unspecified Moron
Paenibacillus larvae	ADFW01000001.1||5_partial_1	ADFW01000001.1||5_partial_1__00017	S	4QCNP		-	-	-
Paenibacillus larvae	ADFW01000001.1||5_partial_1	ADFW01000001.1||5_partial_1__00014	Ph	-	-	phrog_3088	amidase	-
Paenibacillus larvae	ADFW01000001.1||5_partial_1	ADFW01000001.1||5_partial_1__00029	Ph	-	-	phrog_40	head-tail adaptor Ad1	-
Paenibacillus larvae	ADFW01000001.1||5_partial_1	ADFW01000001.1||5_partial_1__00018	Ph	-	-	phrog_5339	virion structural protein	-
Paenibacillus larvae	ADFW01000001.1||5_partial_1	ADFW01000001.1||5_partial_1__00037	Ph	-	-	phrog_361	terminase small subunit	-
Paenibacillus larvae	ADFW01000001.1||5_partial_1	ADFW01000001.1||5_partial_1__00015	Ph	-	-	phrog_2429	involved in bacteriocin production or immunity	Unspecified Moron
Paenibacillus larvae	ADFW01000001.1||5_partial_1	ADFW01000001.1||5_partial_1__00001	H	COG0635	Involved in the biosynthesis of porphyrin-containing compound	-	-	Potential AMG
Paenibacillus larvae	ADFW01000001.1||5_partial_1	ADFW01000001.1||5_partial_1__00035	Ph	-	-	phrog_9	terminase large subunit	-
Paenibacillus larvae	ADFW01000001.1||5_partial_1	ADFW01000001.1||5_partial_1__00019	Ph	-	-	phrog_5339	virion structural protein	-
Paenibacillus larvae	ADFW01000001.1||5_partial_1	ADFW01000001.1||5_partial_1__00011	S	4QAY4		-	-	-
Paenibacillus larvae	ADFW01000001.1||5_partial_1	ADFW01000001.1||5_partial_1__00016	S	4QEHA		-	-	-
Paenibacillus larvae	ADFW01000001.1||5_partial_1	ADFW01000001.1||5_partial_1__00032	Ph	-	-	phrog_94	head maturation protease	-
Paenibacillus larvae	ADFW01000001.1||5_partial_1	ADFW01000001.1||5_partial_1__00030	Ph	-	-	phrog_10	major head protein	-
Paenibacillus larvae	ADFW01000001.1||5_partial_1	ADFW01000001.1||5_partial_1__00012	S	4QC76	guanosine tetraphosphate metabolic process	-	-	-
Paenibacillus larvae	ADFW01000001.1||5_partial_1	ADFW01000001.1||5_partial_1__00025	Ph	-	-	phrog_1407	major tail protein	-
Paenibacillus larvae	ADFW01000001.1||5_partial_1	ADFW01000001.1||5_partial_1__00027	Ph	-	-	phrog_5	tail completion or Neck1 protein	-
Paenibacillus larvae	ADFW01000001.1||5_partial_1	ADFW01000001.1||5_partial_1__00020	Ph	-	-	phrog_538	minor tail protein	-
Paenibacillus larvae	ADFW01000001.1||5_partial_1	ADFW01000001.1||5_partial_1__00021	Ph	-	-	phrog_33	distal tail protein Dit	-
Paenibacillus larvae	ADFW01000001.1||5_partial_1	ADFW01000001.1||5_partial_1__00022	Ph	-	-	phrog_1272	tail length tape measure protein	-
Paenibacillus larvae	ADFW01000001.1||6_partial_1	ADFW01000001.1||6_partial_1__00014	Ph	-	-	phrog_120	baseplate wedge subunit	-
Paenibacillus larvae	ADFW01000001.1||6_partial_1	ADFW01000001.1||6_partial_1__00026	Ph	-	-	phrog_8	transcriptional regulator	-
Paenibacillus larvae	ADFW01000001.1||6_partial_1	ADFW01000001.1||6_partial_1__00029	S	2ZAKU	Psort location CytoplasmicMembrane, score	-	-	-
Paenibacillus larvae	ADFW01000001.1||6_partial_1	ADFW01000001.1||6_partial_1__00017	Ph	-	-	phrog_380	endolysin	-
Paenibacillus larvae	ADFW01000001.1||6_partial_1	ADFW01000001.1||6_partial_1__00012	Ph	-	-	phrog_521	tail protein	-
Paenibacillus larvae	ADFW01000001.1||6_partial_1	ADFW01000001.1||6_partial_1__00018	Ph	-	-	phrog_1068	tail length tape measure protein	-
Paenibacillus larvae	ADFW01000001.1||6_partial_1	ADFW01000001.1||6_partial_1__00007	Ph	-	-	phrog_199	holin	-
Paenibacillus larvae	ADFW01000001.1||6_partial_1	ADFW01000001.1||6_partial_1__00009	0			-	-	-
Paenibacillus larvae	ADFW01000001.1||6_partial_1	ADFW01000001.1||6_partial_1__00039	0			-	-	-
Paenibacillus larvae	ADFW01000001.1||6_partial_1	ADFW01000001.1||6_partial_1__00027	S	4QCCB	Pfam:Peptidase_M78	-	-	-
Paenibacillus larvae	ADFW01000001.1||6_partial_1	ADFW01000001.1||6_partial_1__00034	0			-	-	-
Paenibacillus larvae	ADFW01000001.1||6_partial_1	ADFW01000001.1||6_partial_1__00030	S	COG3081	Nucleoid-associated protein	-	-	-
Paenibacillus larvae	ADFW01000001.1||6_partial_1	ADFW01000001.1||6_partial_1__00020	Ph	-	-	phrog_365	tail protein	-
Paenibacillus larvae	ADFW01000001.1||6_partial_1	ADFW01000001.1||6_partial_1__00005	S	2S4VE	unknown	-	-	-
Paenibacillus larvae	ADFW01000001.1||6_partial_1	ADFW01000001.1||6_partial_1__00035	0			-	-	-
Paenibacillus larvae	ADFW01000001.1||6_partial_1	ADFW01000001.1||6_partial_1__00037	L	arCOG09405	Peptidoglycan-binding domain 1 protein	-	-	-
Paenibacillus larvae	ADFW01000001.1||6_partial_1	ADFW01000001.1||6_partial_1__00025	Ph	-	-	phrog_248	transcriptional activator	-
Paenibacillus larvae	ADFW01000001.1||6_partial_1	ADFW01000001.1||6_partial_1__00019	Ph	-	-	phrog_389	tail protein XkdN-like	-
Paenibacillus larvae	ADFW01000001.1||6_partial_1	ADFW01000001.1||6_partial_1__00002	S	33AQH	unknown	-	-	-
Paenibacillus larvae	ADFW01000001.1||6_partial_1	ADFW01000001.1||6_partial_1__00004	S	336W6	YolD-like protein	-	-	-
Paenibacillus larvae	ADFW01000001.1||6_partial_1	ADFW01000001.1||6_partial_1__00024	S	3375J	unknown	-	-	-
Paenibacillus larvae	ADFW01000001.1||6_partial_1	ADFW01000001.1||6_partial_1__00015	S	33B66	Protein of unknown function (DUF2577)	-	-	-
Paenibacillus larvae	ADFW01000001.1||6_partial_1	ADFW01000001.1||6_partial_1__00016	Ph	-	-	phrog_400	tail protein	-
Paenibacillus larvae	ADFW01000001.1||6_partial_1	ADFW01000001.1||6_partial_1__00003	S	33D22	Protein of unknown function (DUF2512)	-	-	-
Paenibacillus larvae	ADFW01000001.1||6_partial_1	ADFW01000001.1||6_partial_1__00010	S	KOG1072	protein ubiquitination	-	-	-
Paenibacillus larvae	ADFW01000001.1||6_partial_1	ADFW01000001.1||6_partial_1__00021	Ph	-	-	phrog_279	tail sheath	-
Paenibacillus larvae	ADFW01000001.1||6_partial_1	ADFW01000001.1||6_partial_1__00013	Ph	-	-	phrog_6	baseplate wedge subunit	-
Paenibacillus larvae	ADFW01000001.1||6_partial_1	ADFW01000001.1||6_partial_1__00022	S	32FG6	unknown	-	-	-
Paenibacillus larvae	ADFW01000001.1||6_partial_1	ADFW01000001.1||6_partial_1__00028	S	3375J	unknown	-	-	-
Paenibacillus larvae	ADFW01000001.1||6_partial_1	ADFW01000001.1||6_partial_1__00036	0			-	-	-
Paenibacillus larvae	ADFW01000001.1||6_partial_1	ADFW01000001.1||6_partial_1__00001	0			-	-	-
Paenibacillus larvae	ADFW01000001.1||6_partial_1	ADFW01000001.1||6_partial_1__00011	S	33NU8	unknown	-	-	-
Paenibacillus larvae	ADFW01000001.1||6_partial_1	ADFW01000001.1||6_partial_1__00038	S	3396V	unknown	-	-	-
Paenibacillus larvae	ADFW01000001.1||6_partial_1	ADFW01000001.1||6_partial_1__00008	S	2ZQ0A	unknown	-	-	-
Paenibacillus larvae	ADFW01000001.1||6_partial_1	ADFW01000001.1||6_partial_1__00031	0			-	-	-
Paenibacillus larvae	ADFW01000001.1||6_partial_1	ADFW01000001.1||6_partial_1__00032	0			-	-	-
Paenibacillus larvae	ADFW01000001.1||6_partial_1	ADFW01000001.1||6_partial_1__00006	Ph	-	-	phrog_833	endolysin	-
Paenibacillus larvae	ADFW01000001.1||6_partial_1	ADFW01000001.1||6_partial_1__00033	0			-	-	-
Paenibacillus larvae	ADFW01000001.1||6_partial_1	ADFW01000001.1||6_partial_1__00023	S	32YNZ	unknown	-	-	-
Paenibacillus larvae	ADFW01000001.1||7_partial	ADFW01000001.1||7_partial__00002	O	arCOG02833	COG0265 Trypsin-like serine proteases, typically periplasmic, contain C-terminal PDZ domain	-	-	-
Paenibacillus larvae	ADFW01000001.1||7_partial	ADFW01000001.1||7_partial__00006	S	COG4863	YycH protein	-	-	-
Paenibacillus larvae	ADFW01000001.1||7_partial	ADFW01000001.1||7_partial__00005	S	COG4853	Protein conserved in bacteria	-	-	-
Paenibacillus larvae	ADFW01000001.1||7_partial	ADFW01000001.1||7_partial__00007	T	COG2770	Histidine kinase	-	-	-
Paenibacillus larvae	ADFW01000001.1||7_partial	ADFW01000001.1||7_partial__00001	S	33BM4	YyzF-like protein	-	-	-
Paenibacillus larvae	ADFW01000001.1||7_partial	ADFW01000001.1||7_partial__00011	S	COG5294	Protein conserved in bacteria	-	-	-
Paenibacillus larvae	ADFW01000001.1||7_partial	ADFW01000001.1||7_partial__00004	J	arCOG00502	PFAM beta-lactamase domain protein	-	-	-
Paenibacillus larvae	ADFW01000001.1||7_partial	ADFW01000001.1||7_partial__00010	S	32XC5	unknown	-	-	-
Paenibacillus larvae	ADFW01000001.1||7_partial	ADFW01000001.1||7_partial__00003	S	33H3T	unknown	-	-	-
Paenibacillus larvae	ADFW01000001.1||7_partial	ADFW01000001.1||7_partial__00008	T	2S0V7	Transcriptional regulatory protein, C terminal	-	-	-
Paenibacillus larvae	ADFW01000001.1||7_partial	ADFW01000001.1||7_partial__00009	Ph	-	-	phrog_3578	endolysin	-
Paenibacillus larvae	ADFW01000002.1||0_partial_1	ADFW01000002.1||0_partial_1__00050	S	30J7K	Helix-turn-helix domain	-	-	-
Paenibacillus larvae	ADFW01000002.1||0_partial_1	ADFW01000002.1||0_partial_1__00009	S	2ZCCB	unknown	-	-	-
Paenibacillus larvae	ADFW01000002.1||0_partial_1	ADFW01000002.1||0_partial_1__00018	Ph	-	-	phrog_351	RNA polymerase sigma factor	-
Paenibacillus larvae	ADFW01000002.1||0_partial_1	ADFW01000002.1||0_partial_1__00058	S	33MFV	unknown	-	-	-
Paenibacillus larvae	ADFW01000002.1||0_partial_1	ADFW01000002.1||0_partial_1__00070	0			-	-	-
Paenibacillus larvae	ADFW01000002.1||0_partial_1	ADFW01000002.1||0_partial_1__00048	Ph	-	-	phrog_151	transposase	-
Paenibacillus larvae	ADFW01000002.1||0_partial_1	ADFW01000002.1||0_partial_1__00011	Ph	-	-	phrog_124	Sak4-like ssDNA annealing protein	-
Paenibacillus larvae	ADFW01000002.1||0_partial_1	ADFW01000002.1||0_partial_1__00020	Ph	-	-	phrog_36	transcriptional regulator	-
Paenibacillus larvae	ADFW01000002.1||0_partial_1	ADFW01000002.1||0_partial_1__00053	M	arCOG01389	PFAM Glycosyl transferase family 2	-	-	-
Paenibacillus larvae	ADFW01000002.1||0_partial_1	ADFW01000002.1||0_partial_1__00010	S	4QEW8		-	-	-
Paenibacillus larvae	ADFW01000002.1||0_partial_1	ADFW01000002.1||0_partial_1__00012	S	4QDCH		-	-	-
Paenibacillus larvae	ADFW01000002.1||0_partial_1	ADFW01000002.1||0_partial_1__00044	Ph	-	-	phrog_199	holin	-
Paenibacillus larvae	ADFW01000002.1||0_partial_1	ADFW01000002.1||0_partial_1__00049	Ph	-	-	phrog_157	transposase	-
Paenibacillus larvae	ADFW01000002.1||0_partial_1	ADFW01000002.1||0_partial_1__00007	Ph	-	-	phrog_4681	antitoxin from a toxin-antitoxin system	Unspecified Moron
Paenibacillus larvae	ADFW01000002.1||0_partial_1	ADFW01000002.1||0_partial_1__00003	S	33M1V	unknown	-	-	-
Paenibacillus larvae	ADFW01000002.1||0_partial_1	ADFW01000002.1||0_partial_1__00014	Ph	-	-	phrog_2597	DNA primase	-
Paenibacillus larvae	ADFW01000002.1||0_partial_1	ADFW01000002.1||0_partial_1__00072	0			-	-	-
Paenibacillus larvae	ADFW01000002.1||0_partial_1	ADFW01000002.1||0_partial_1__00042	S	4QCNP		-	-	-
Paenibacillus larvae	ADFW01000002.1||0_partial_1	ADFW01000002.1||0_partial_1__00041	Ph	-	-	phrog_5339	virion structural protein	-
Paenibacillus larvae	ADFW01000002.1||0_partial_1	ADFW01000002.1||0_partial_1__00028	Ph	-	-	phrog_115	minor head protein	-
Paenibacillus larvae	ADFW01000002.1||0_partial_1	ADFW01000002.1||0_partial_1__00056	0			-	-	-
Paenibacillus larvae	ADFW01000002.1||0_partial_1	ADFW01000002.1||0_partial_1__00055	Ph	-	-	phrog_2331	transposase	-
Paenibacillus larvae	ADFW01000002.1||0_partial_1	ADFW01000002.1||0_partial_1__00067	Ph	-	-	phrog_63	anti-repressor Ant	-
Paenibacillus larvae	ADFW01000002.1||0_partial_1	ADFW01000002.1||0_partial_1__00043	S	4QEHA		-	-	-
Paenibacillus larvae	ADFW01000002.1||0_partial_1	ADFW01000002.1||0_partial_1__00021	S	33BWX	unknown	-	-	-
Paenibacillus larvae	ADFW01000002.1||0_partial_1	ADFW01000002.1||0_partial_1__00032	S	2ZX3I	unknown	-	-	-
Paenibacillus larvae	ADFW01000002.1||0_partial_1	ADFW01000002.1||0_partial_1__00047	Ph	-	-	phrog_1299	holin	-
Paenibacillus larvae	ADFW01000002.1||0_partial_1	ADFW01000002.1||0_partial_1__00045	Ph	-	-	phrog_3088	amidase	-
Paenibacillus larvae	ADFW01000002.1||0_partial_1	ADFW01000002.1||0_partial_1__00061	0			-	-	-
Paenibacillus larvae	ADFW01000002.1||0_partial_1	ADFW01000002.1||0_partial_1__00016	Ph	-	-	phrog_140	RusA-like Holliday junction resolvase	-
Paenibacillus larvae	ADFW01000002.1||0_partial_1	ADFW01000002.1||0_partial_1__00037	S	32XJQ	unknown	-	-	-
Paenibacillus larvae	ADFW01000002.1||0_partial_1	ADFW01000002.1||0_partial_1__00062	Ph	-	-	phrog_293	ABC transporter	Unspecified Moron
Paenibacillus larvae	ADFW01000002.1||0_partial_1	ADFW01000002.1||0_partial_1__00001	S	4QCCB	Pfam:Peptidase_M78	-	-	-
Paenibacillus larvae	ADFW01000002.1||0_partial_1	ADFW01000002.1||0_partial_1__00005	S	306F8	unknown	-	-	-
Paenibacillus larvae	ADFW01000002.1||0_partial_1	ADFW01000002.1||0_partial_1__00038	Ph	-	-	phrog_58	tail length tape measure protein	-
Paenibacillus larvae	ADFW01000002.1||0_partial_1	ADFW01000002.1||0_partial_1__00060	S	2Z8P5	Lantibiotic dehydratase, C terminus	-	-	-
Paenibacillus larvae	ADFW01000002.1||0_partial_1	ADFW01000002.1||0_partial_1__00069	Ph	-	-	phrog_373	anti-repressor	-
Paenibacillus larvae	ADFW01000002.1||0_partial_1	ADFW01000002.1||0_partial_1__00035	Ph	-	-	phrog_1407	major tail protein	-
Paenibacillus larvae	ADFW01000002.1||0_partial_1	ADFW01000002.1||0_partial_1__00064	Ph	-	-	phrog_1	integrase	-
Paenibacillus larvae	ADFW01000002.1||0_partial_1	ADFW01000002.1||0_partial_1__00030	Ph	-	-	phrog_544	major head protein	-
Paenibacillus larvae	ADFW01000002.1||0_partial_1	ADFW01000002.1||0_partial_1__00023	S	33670	unknown	-	-	-
Paenibacillus larvae	ADFW01000002.1||0_partial_1	ADFW01000002.1||0_partial_1__00054	M	arCOG01391	PFAM Glycosyl transferase family 2	-	-	-
Paenibacillus larvae	ADFW01000002.1||0_partial_1	ADFW01000002.1||0_partial_1__00008	Ph	-	-	phrog_997	replication terminator	-
Paenibacillus larvae	ADFW01000002.1||0_partial_1	ADFW01000002.1||0_partial_1__00022	0			-	-	-
Paenibacillus larvae	ADFW01000002.1||0_partial_1	ADFW01000002.1||0_partial_1__00071	0			-	-	-
Paenibacillus larvae	ADFW01000002.1||0_partial_1	ADFW01000002.1||0_partial_1__00046	S	32SVK	unknown	-	-	-
Paenibacillus larvae	ADFW01000002.1||0_partial_1	ADFW01000002.1||0_partial_1__00033	S	32YF3	unknown	-	-	-
Paenibacillus larvae	ADFW01000002.1||0_partial_1	ADFW01000002.1||0_partial_1__00040	Ph	-	-	phrog_3558	tail protein	-
Paenibacillus larvae	ADFW01000002.1||0_partial_1	ADFW01000002.1||0_partial_1__00036	Ph	-	-	phrog_2115	tail protein	-
Paenibacillus larvae	ADFW01000002.1||0_partial_1	ADFW01000002.1||0_partial_1__00066	Ph	-	-	phrog_1468	transcriptional repressor	-
Paenibacillus larvae	ADFW01000002.1||0_partial_1	ADFW01000002.1||0_partial_1__00006	0			-	-	-
Paenibacillus larvae	ADFW01000002.1||0_partial_1	ADFW01000002.1||0_partial_1__00031	Ph	-	-	phrog_132	head-tail adaptor	-
Paenibacillus larvae	ADFW01000002.1||0_partial_1	ADFW01000002.1||0_partial_1__00063	U	COG4473	ABC transporter	-	-	-
Paenibacillus larvae	ADFW01000002.1||0_partial_1	ADFW01000002.1||0_partial_1__00019	S	30BXN	unknown	-	-	-
Paenibacillus larvae	ADFW01000002.1||0_partial_1	ADFW01000002.1||0_partial_1__00002	Ph	-	-	phrog_8	transcriptional regulator	-
Paenibacillus larvae	ADFW01000002.1||0_partial_1	ADFW01000002.1||0_partial_1__00051	S	2SQ9V	Bacillus/Clostridium GerA spore germination protein	-	-	-
Paenibacillus larvae	ADFW01000002.1||0_partial_1	ADFW01000002.1||0_partial_1__00015	0			-	-	-
Paenibacillus larvae	ADFW01000002.1||0_partial_1	ADFW01000002.1||0_partial_1__00013	Ph	-	-	phrog_16	DNA helicase	-
Paenibacillus larvae	ADFW01000002.1||0_partial_1	ADFW01000002.1||0_partial_1__00004	0			-	-	-
Paenibacillus larvae	ADFW01000002.1||0_partial_1	ADFW01000002.1||0_partial_1__00059	0			-	-	-
Paenibacillus larvae	ADFW01000002.1||0_partial_1	ADFW01000002.1||0_partial_1__00052	E	2SUPZ	Thermolysin metallopeptidase, alpha-helical domain	-	-	Potential AMG
Paenibacillus larvae	ADFW01000002.1||0_partial_1	ADFW01000002.1||0_partial_1__00039	Ph	-	-	phrog_33	distal tail protein Dit	-
Paenibacillus larvae	ADFW01000002.1||0_partial_1	ADFW01000002.1||0_partial_1__00068	S	33M1V	unknown	-	-	-
Paenibacillus larvae	ADFW01000002.1||0_partial_1	ADFW01000002.1||0_partial_1__00029	Ph	-	-	phrog_172	head scaffolding protein	-
Paenibacillus larvae	ADFW01000002.1||0_partial_1	ADFW01000002.1||0_partial_1__00034	Ph	-	-	phrog_176	tail terminator	-
Paenibacillus larvae	ADFW01000002.1||0_partial_1	ADFW01000002.1||0_partial_1__00026	Ph	-	-	phrog_10250	terminase large subunit	-
Paenibacillus larvae	ADFW01000002.1||0_partial_1	ADFW01000002.1||0_partial_1__00027	Ph	-	-	phrog_64	portal protein	-
Paenibacillus larvae	ADFW01000002.1||0_partial_1	ADFW01000002.1||0_partial_1__00057	G	KOG2653	D-gluconate metabolic process	-	-	Potential AMG
Paenibacillus larvae	ADFW01000002.1||0_partial_1	ADFW01000002.1||0_partial_1__00017	S	30AXH	unknown	-	-	-
Paenibacillus larvae	ADFW01000002.1||0_partial_1	ADFW01000002.1||0_partial_1__00065	Ph	-	-	phrog_18248	transcriptional regulator	-
Paenibacillus larvae	ADFW01000002.1||0_partial_1	ADFW01000002.1||0_partial_1__00025	Ph	-	-	phrog_509	terminase small subunit	-
Paenibacillus larvae	ADFW01000002.1||0_partial_1	ADFW01000002.1||0_partial_1__00024	0			-	-	-
Paenibacillus larvae	ADFW01000003.1||full_1	ADFW01000003.1||full_1__00014	0			-	-	-
Paenibacillus larvae	ADFW01000003.1||full_1	ADFW01000003.1||full_1__00012	0			-	-	-
Paenibacillus larvae	ADFW01000003.1||full_1	ADFW01000003.1||full_1__00017	0			-	-	-
Paenibacillus larvae	ADFW01000003.1||full_1	ADFW01000003.1||full_1__00010	0			-	-	-
Paenibacillus larvae	ADFW01000003.1||full_1	ADFW01000003.1||full_1__00011	0			-	-	-
Paenibacillus larvae	ADFW01000003.1||full_1	ADFW01000003.1||full_1__00015	Ph	-	-	phrog_34	RusA-like Holliday junction resolvase	-
Paenibacillus larvae	ADFW01000003.1||full_1	ADFW01000003.1||full_1__00030	0			-	-	-
Paenibacillus larvae	ADFW01000003.1||full_1	ADFW01000003.1||full_1__00021	S	306HY	unknown	-	-	-
Paenibacillus larvae	ADFW01000003.1||full_1	ADFW01000003.1||full_1__00004	0			-	-	-
Paenibacillus larvae	ADFW01000003.1||full_1	ADFW01000003.1||full_1__00034	0			-	-	-
Paenibacillus larvae	ADFW01000003.1||full_1	ADFW01000003.1||full_1__00009	0			-	-	-
Paenibacillus larvae	ADFW01000003.1||full_1	ADFW01000003.1||full_1__00025	0			-	-	-
Paenibacillus larvae	ADFW01000003.1||full_1	ADFW01000003.1||full_1__00033	S	4QC3C		-	-	-
Paenibacillus larvae	ADFW01000003.1||full_1	ADFW01000003.1||full_1__00027	S	4QE9S		-	-	-
Paenibacillus larvae	ADFW01000003.1||full_1	ADFW01000003.1||full_1__00029	0			-	-	-
Paenibacillus larvae	ADFW01000003.1||full_1	ADFW01000003.1||full_1__00001	Ph	-	-	phrog_361	terminase small subunit	-
Paenibacillus larvae	ADFW01000003.1||full_1	ADFW01000003.1||full_1__00028	S	33HHF	unknown	-	-	-
Paenibacillus larvae	ADFW01000003.1||full_1	ADFW01000003.1||full_1__00031	Ph	-	-	phrog_130	anti-repressor Ant	-
Paenibacillus larvae	ADFW01000003.1||full_1	ADFW01000003.1||full_1__00020	Ph	-	-	phrog_7370	HNH endonuclease	-
Paenibacillus larvae	ADFW01000003.1||full_1	ADFW01000003.1||full_1__00013	S	4QAIJ	C-5 cytosine-specific DNA methylase	-	-	-
Paenibacillus larvae	ADFW01000003.1||full_1	ADFW01000003.1||full_1__00008	Ph	-	-	phrog_248	transcriptional activator	-
Paenibacillus larvae	ADFW01000003.1||full_1	ADFW01000003.1||full_1__00032	S	4QEAN		-	-	-
Paenibacillus larvae	ADFW01000003.1||full_1	ADFW01000003.1||full_1__00024	Ph	-	-	phrog_2205	Mu Gam-like end protection	-
Paenibacillus larvae	ADFW01000003.1||full_1	ADFW01000003.1||full_1__00019	Ph	-	-	phrog_186	DnaD-like helicase loader	-
Paenibacillus larvae	ADFW01000003.1||full_1	ADFW01000003.1||full_1__00026	S	4QE9S		-	-	-
Paenibacillus larvae	ADFW01000003.1||full_1	ADFW01000003.1||full_1__00005	Ph	-	-	phrog_353	toxin	Unspecified Moron
Paenibacillus larvae	ADFW01000003.1||full_1	ADFW01000003.1||full_1__00007	S	COG5294	Protein conserved in bacteria	-	-	-
Paenibacillus larvae	ADFW01000003.1||full_1	ADFW01000003.1||full_1__00022	Ph	-	-	phrog_44	single strand DNA binding protein	-
Paenibacillus larvae	ADFW01000003.1||full_1	ADFW01000003.1||full_1__00023	Ph	-	-	phrog_155	Erf-like ssDNA annealing protein	-
Paenibacillus larvae	ADFW01000003.1||full_1	ADFW01000003.1||full_1__00018	Ph	-	-	phrog_50	DnaC-like helicase loader	-
Paenibacillus larvae	ADFW01000003.1||full_1	ADFW01000003.1||full_1__00016	Ph	-	-	phrog_3356	transposase	-
Paenibacillus larvae	ADFW01000003.1||full_1	ADFW01000003.1||full_1__00002	Ph	-	-	phrog_144	HNH endonuclease	-
Paenibacillus larvae	ADFW01000003.1||full_1	ADFW01000003.1||full_1__00003	S	33G8I	unknown	-	-	-
Paenibacillus larvae	ADFW01000003.1||full_1	ADFW01000003.1||full_1__00006	Ph	-	-	phrog_497	toxin-antitoxin system HicB-like	Unspecified Moron
Paenibacillus larvae	ADFW01000005.1||full	ADFW01000005.1||full__00017	S	33G8I	unknown	-	-	-
Paenibacillus larvae	ADFW01000005.1||full	ADFW01000005.1||full__00020	Ph	-	-	phrog_10517	terminase large subunit	-
Paenibacillus larvae	ADFW01000005.1||full	ADFW01000005.1||full__00004	J	arCOG00502	PFAM beta-lactamase domain protein	-	-	-
Paenibacillus larvae	ADFW01000005.1||full	ADFW01000005.1||full__00006	Ph	-	-	phrog_2514	DnaD-like helicase loader	-
Paenibacillus larvae	ADFW01000005.1||full	ADFW01000005.1||full__00010	0			-	-	-
Paenibacillus larvae	ADFW01000005.1||full	ADFW01000005.1||full__00021	Ph	-	-	phrog_9	terminase large subunit	-
Paenibacillus larvae	ADFW01000005.1||full	ADFW01000005.1||full__00008	S	4QGFE		-	-	-
Paenibacillus larvae	ADFW01000005.1||full	ADFW01000005.1||full__00002	S	4QD9Q		-	-	-
Paenibacillus larvae	ADFW01000005.1||full	ADFW01000005.1||full__00003	Ph	-	-	phrog_2780	RecT-like ssDNA annealing protein	-
Paenibacillus larvae	ADFW01000005.1||full	ADFW01000005.1||full__00001	S	4QG2D		-	-	-
Paenibacillus larvae	ADFW01000005.1||full	ADFW01000005.1||full__00014	Ph	-	-	phrog_248	transcriptional activator	-
Paenibacillus larvae	ADFW01000005.1||full	ADFW01000005.1||full__00007	Ph	-	-	phrog_19	DnaB-like replicative helicase	-
Paenibacillus larvae	ADFW01000005.1||full	ADFW01000005.1||full__00012	Ph	-	-	phrog_159	RuvC-like Holliday junction resolvase	-
Paenibacillus larvae	ADFW01000005.1||full	ADFW01000005.1||full__00019	Ph	-	-	phrog_361	terminase small subunit	-
Paenibacillus larvae	ADFW01000005.1||full	ADFW01000005.1||full__00015	Ph	-	-	phrog_497	toxin-antitoxin system HicB-like	Unspecified Moron
Paenibacillus larvae	ADFW01000005.1||full	ADFW01000005.1||full__00009	S	4QAIJ	C-5 cytosine-specific DNA methylase	-	-	-
Paenibacillus larvae	ADFW01000005.1||full	ADFW01000005.1||full__00022	Ph	-	-	phrog_2699	terminase large subunit	-
Paenibacillus larvae	ADFW01000005.1||full	ADFW01000005.1||full__00011	S	4QBPM		-	-	-
Paenibacillus larvae	ADFW01000005.1||full	ADFW01000005.1||full__00016	Ph	-	-	phrog_353	toxin	Unspecified Moron
Paenibacillus larvae	ADFW01000005.1||full	ADFW01000005.1||full__00005	S	4QAII		-	-	-
Paenibacillus larvae	ADFW01000005.1||full	ADFW01000005.1||full__00013	S	4QDAG		-	-	-
Paenibacillus larvae	ADFW01000005.1||full	ADFW01000005.1||full__00018	Ph	-	-	phrog_119	HNH endonuclease	-
Paenibacillus larvae	ADFW01000006.1||full	ADFW01000006.1||full__00005	S	4QAXV	YopX protein	-	-	-
Paenibacillus larvae	ADFW01000006.1||full	ADFW01000006.1||full__00010	Ph	-	-	phrog_159	RuvC-like Holliday junction resolvase	-
Paenibacillus larvae	ADFW01000006.1||full	ADFW01000006.1||full__00011	S	4QDAG		-	-	-
Paenibacillus larvae	ADFW01000006.1||full	ADFW01000006.1||full__00013	0			-	-	-
Paenibacillus larvae	ADFW01000006.1||full	ADFW01000006.1||full__00002	S	4QGFE		-	-	-
Paenibacillus larvae	ADFW01000006.1||full	ADFW01000006.1||full__00009	S	4QBPM		-	-	-
Paenibacillus larvae	ADFW01000006.1||full	ADFW01000006.1||full__00008	0			-	-	-
Paenibacillus larvae	ADFW01000006.1||full	ADFW01000006.1||full__00001	Ph	-	-	phrog_19	DnaB-like replicative helicase	-
Paenibacillus larvae	ADFW01000006.1||full	ADFW01000006.1||full__00017	Ph	-	-	phrog_2331	transposase	-
Paenibacillus larvae	ADFW01000006.1||full	ADFW01000006.1||full__00014	Ph	-	-	phrog_95	integrase	-
Paenibacillus larvae	ADFW01000006.1||full	ADFW01000006.1||full__00006	Ph	-	-	phrog_8	transcriptional regulator	-
Paenibacillus larvae	ADFW01000006.1||full	ADFW01000006.1||full__00007	0			-	-	-
Paenibacillus larvae	ADFW01000006.1||full	ADFW01000006.1||full__00003	0			-	-	-
Paenibacillus larvae	ADFW01000006.1||full	ADFW01000006.1||full__00004	0			-	-	-
Paenibacillus larvae	ADFW01000006.1||full	ADFW01000006.1||full__00015	0			-	-	-
Paenibacillus larvae	ADFW01000006.1||full	ADFW01000006.1||full__00016	Ph	-	-	phrog_2331	transposase	-
Paenibacillus larvae	ADFW01000006.1||full	ADFW01000006.1||full__00012	Ph	-	-	phrog_248	transcriptional activator	-
Paenibacillus larvae	ADFW01000007.1||full	ADFW01000007.1||full__00001	S	4QCNP		-	-	-
Paenibacillus larvae	ADFW01000007.1||full	ADFW01000007.1||full__00007	S	33R24	unknown	-	-	-
Paenibacillus larvae	ADFW01000007.1||full	ADFW01000007.1||full__00002	S	4QEHA		-	-	-
Paenibacillus larvae	ADFW01000007.1||full	ADFW01000007.1||full__00003	Ph	-	-	phrog_2429	involved in bacteriocin production or immunity	Unspecified Moron
Paenibacillus larvae	ADFW01000007.1||full	ADFW01000007.1||full__00006	Ph	-	-	phrog_1299	holin	-
Paenibacillus larvae	ADFW01000007.1||full	ADFW01000007.1||full__00008	S	30E2J	unknown	-	-	-
Paenibacillus larvae	ADFW01000007.1||full	ADFW01000007.1||full__00005	S	4QCCA		-	-	-
Paenibacillus larvae	ADFW01000007.1||full	ADFW01000007.1||full__00010	Ph	-	-	phrog_37443	toxin	Unspecified Moron
Paenibacillus larvae	ADFW01000007.1||full	ADFW01000007.1||full__00009	0			-	-	-
Paenibacillus larvae	ADFW01000007.1||full	ADFW01000007.1||full__00004	Ph	-	-	phrog_3088	amidase	-
Paenibacillus larvae	ADZY03000008.1||full	ADZY03000008.1||full__00016	Ph	-	-	phrog_1533	tail length tape measure protein	-
Paenibacillus larvae	ADZY03000008.1||full	ADZY03000008.1||full__00001	Ph	-	-	phrog_36	transcriptional regulator	-
Paenibacillus larvae	ADZY03000008.1||full	ADZY03000008.1||full__00009	Ph	-	-	phrog_10	major head protein	-
Paenibacillus larvae	ADZY03000008.1||full	ADZY03000008.1||full__00008	Ph	-	-	phrog_80	head maturation protease	-
Paenibacillus larvae	ADZY03000008.1||full	ADZY03000008.1||full__00007	Ph	-	-	phrog_12	portal protein	-
Paenibacillus larvae	ADZY03000008.1||full	ADZY03000008.1||full__00003	S	33MWH	unknown	-	-	-
Paenibacillus larvae	ADZY03000008.1||full	ADZY03000008.1||full__00006	Ph	-	-	phrog_9	terminase large subunit	-
Paenibacillus larvae	ADZY03000008.1||full	ADZY03000008.1||full__00018	Ph	-	-	phrog_538	minor tail protein	-
Paenibacillus larvae	ADZY03000008.1||full	ADZY03000008.1||full__00010	S	331B9	unknown	-	-	-
Paenibacillus larvae	ADZY03000008.1||full	ADZY03000008.1||full__00015	S	32J4N	unknown	-	-	-
Paenibacillus larvae	ADZY03000008.1||full	ADZY03000008.1||full__00017	Ph	-	-	phrog_33	distal tail protein Dit	-
Paenibacillus larvae	ADZY03000008.1||full	ADZY03000008.1||full__00004	Ph	-	-	phrog_119	HNH endonuclease	-
Paenibacillus larvae	ADZY03000008.1||full	ADZY03000008.1||full__00012	Ph	-	-	phrog_5	tail completion or Neck1 protein	-
Paenibacillus larvae	ADZY03000008.1||full	ADZY03000008.1||full__00014	Ph	-	-	phrog_88	major tail protein	-
Paenibacillus larvae	ADZY03000008.1||full	ADZY03000008.1||full__00011	Ph	-	-	phrog_1951	head-tail adaptor	-
Paenibacillus larvae	ADZY03000008.1||full	ADZY03000008.1||full__00005	Ph	-	-	phrog_361	terminase small subunit	-
Paenibacillus larvae	ADZY03000008.1||full	ADZY03000008.1||full__00013	Ph	-	-	phrog_78	tail terminator	-
Paenibacillus larvae	ADZY03000041.1||full	ADZY03000041.1||full__00031	0			-	-	-
Paenibacillus larvae	ADZY03000041.1||full	ADZY03000041.1||full__00018	0			-	-	-
Paenibacillus larvae	ADZY03000041.1||full	ADZY03000041.1||full__00015	Ph	-	-	phrog_1533	tail length tape measure protein	-
Paenibacillus larvae	ADZY03000041.1||full	ADZY03000041.1||full__00035	0			-	-	-
Paenibacillus larvae	ADZY03000041.1||full	ADZY03000041.1||full__00034	0			-	-	-
Paenibacillus larvae	ADZY03000041.1||full	ADZY03000041.1||full__00008	Ph	-	-	phrog_2742	endolysin	-
Paenibacillus larvae	ADZY03000041.1||full	ADZY03000041.1||full__00012	Ph	-	-	phrog_12312	virion structural protein	-
Paenibacillus larvae	ADZY03000041.1||full	ADZY03000041.1||full__00014	Ph	-	-	phrog_1533	tail length tape measure protein	-
Paenibacillus larvae	ADZY03000041.1||full	ADZY03000041.1||full__00006	0			-	-	-
Paenibacillus larvae	ADZY03000041.1||full	ADZY03000041.1||full__00002	S	30CG0	unknown	-	-	-
Paenibacillus larvae	ADZY03000041.1||full	ADZY03000041.1||full__00030	0			-	-	-
Paenibacillus larvae	ADZY03000041.1||full	ADZY03000041.1||full__00011	S	32KD7	XkdW protein	-	-	-
Paenibacillus larvae	ADZY03000041.1||full	ADZY03000041.1||full__00003	0			-	-	-
Paenibacillus larvae	ADZY03000041.1||full	ADZY03000041.1||full__00007	0			-	-	-
Paenibacillus larvae	ADZY03000041.1||full	ADZY03000041.1||full__00017	S	2ZJA0	unknown	-	-	-
Paenibacillus larvae	ADZY03000041.1||full	ADZY03000041.1||full__00033	0			-	-	-
Paenibacillus larvae	ADZY03000041.1||full	ADZY03000041.1||full__00009	Ph	-	-	phrog_2742	endolysin	-
Paenibacillus larvae	ADZY03000041.1||full	ADZY03000041.1||full__00004	S	33IDB	unknown	-	-	-
Paenibacillus larvae	ADZY03000041.1||full	ADZY03000041.1||full__00016	0			-	-	-
Paenibacillus larvae	ADZY03000041.1||full	ADZY03000041.1||full__00027	Ph	-	-	phrog_533	portal protein	-
Paenibacillus larvae	ADZY03000041.1||full	ADZY03000041.1||full__00036	Ph	-	-	phrog_2331	transposase	-
Paenibacillus larvae	ADZY03000041.1||full	ADZY03000041.1||full__00010	Ph	-	-	phrog_199	holin	-
Paenibacillus larvae	ADZY03000041.1||full	ADZY03000041.1||full__00005	K	334GS	Transcriptional regulator	-	-	-
Paenibacillus larvae	ADZY03000041.1||full	ADZY03000041.1||full__00020	Ph	-	-	phrog_10344	minor head protein	-
Paenibacillus larvae	ADZY03000041.1||full	ADZY03000041.1||full__00023	S	33EYZ	unknown	-	-	-
Paenibacillus larvae	ADZY03000041.1||full	ADZY03000041.1||full__00024	Ph	-	-	phrog_212	major head protein	-
Paenibacillus larvae	ADZY03000041.1||full	ADZY03000041.1||full__00028	Ph	-	-	phrog_38	terminase large subunit	-
Paenibacillus larvae	ADZY03000041.1||full	ADZY03000041.1||full__00029	Ph	-	-	phrog_38	terminase large subunit	-
Paenibacillus larvae	ADZY03000041.1||full	ADZY03000041.1||full__00025	Ph	-	-	phrog_2303	head scaffolding protein	-
Paenibacillus larvae	ADZY03000041.1||full	ADZY03000041.1||full__00032	Ph	-	-	phrog_2538	terminase small subunit	-
Paenibacillus larvae	ADZY03000041.1||full	ADZY03000041.1||full__00026	Ph	-	-	phrog_4611	minor head protein	-
Paenibacillus larvae	ADZY03000041.1||full	ADZY03000041.1||full__00021	S	34B2Z	unknown	-	-	-
Paenibacillus larvae	ADZY03000041.1||full	ADZY03000041.1||full__00019	S	305KB	unknown	-	-	-
Paenibacillus larvae	ADZY03000041.1||full	ADZY03000041.1||full__00013	Ph	-	-	phrog_202	distal tail protein Dit	-
Paenibacillus larvae	ADZY03000041.1||full	ADZY03000041.1||full__00022	S	33IQ1	unknown	-	-	-
Paenibacillus larvae	ADZY03000041.1||full	ADZY03000041.1||full__00001	S	34C4Y	unknown	-	-	-
Paenibacillus larvae	ADZY03000097.1||full	ADZY03000097.1||full__00010	Ph	-	-	phrog_10	major head protein	-
Paenibacillus larvae	ADZY03000097.1||full	ADZY03000097.1||full__00001	Ph	-	-	phrog_538	minor tail protein	-
Paenibacillus larvae	ADZY03000097.1||full	ADZY03000097.1||full__00007	Ph	-	-	phrog_5	tail completion or Neck1 protein	-
Paenibacillus larvae	ADZY03000097.1||full	ADZY03000097.1||full__00003	Ph	-	-	phrog_1272	tail length tape measure protein	-
Paenibacillus larvae	ADZY03000097.1||full	ADZY03000097.1||full__00005	Ph	-	-	phrog_88	major tail protein	-
Paenibacillus larvae	ADZY03000097.1||full	ADZY03000097.1||full__00006	Ph	-	-	phrog_78	tail terminator	-
Paenibacillus larvae	ADZY03000097.1||full	ADZY03000097.1||full__00004	Ph	-	-	phrog_2115	tail protein	-
Paenibacillus larvae	ADZY03000097.1||full	ADZY03000097.1||full__00011	0			-	-	-
Paenibacillus larvae	ADZY03000097.1||full	ADZY03000097.1||full__00002	Ph	-	-	phrog_33	distal tail protein Dit	-
Paenibacillus larvae	ADZY03000097.1||full	ADZY03000097.1||full__00009	Ph	-	-	phrog_40	head-tail adaptor Ad1	-
Paenibacillus larvae	ADZY03000097.1||full	ADZY03000097.1||full__00008	Ph	-	-	phrog_25	head closure Hc1	-
Paenibacillus larvae	ADZY03000110.1||full	ADZY03000110.1||full__00025	S	33P4N	unknown	-	-	-
Paenibacillus larvae	ADZY03000110.1||full	ADZY03000110.1||full__00026	0			-	-	-
Paenibacillus larvae	ADZY03000110.1||full	ADZY03000110.1||full__00024	Ph	-	-	phrog_69	exonuclease	-
Paenibacillus larvae	ADZY03000110.1||full	ADZY03000110.1||full__00010	Ph	-	-	phrog_62	DNA helicase	-
Paenibacillus larvae	ADZY03000110.1||full	ADZY03000110.1||full__00011	Ph	-	-	phrog_93	endonuclease	-
Paenibacillus larvae	ADZY03000110.1||full	ADZY03000110.1||full__00031	S	4QAIJ	C-5 cytosine-specific DNA methylase	-	-	-
Paenibacillus larvae	ADZY03000110.1||full	ADZY03000110.1||full__00028	Ph	-	-	phrog_4681	antitoxin from a toxin-antitoxin system	Unspecified Moron
Paenibacillus larvae	ADZY03000110.1||full	ADZY03000110.1||full__00005	Ph	-	-	phrog_497	toxin-antitoxin system HicB-like	Unspecified Moron
Paenibacillus larvae	ADZY03000110.1||full	ADZY03000110.1||full__00040	S	33J4E	unknown	-	-	-
Paenibacillus larvae	ADZY03000110.1||full	ADZY03000110.1||full__00034	0			-	-	-
Paenibacillus larvae	ADZY03000110.1||full	ADZY03000110.1||full__00014	S	33C23	unknown	-	-	-
Paenibacillus larvae	ADZY03000110.1||full	ADZY03000110.1||full__00036	0			-	-	-
Paenibacillus larvae	ADZY03000110.1||full	ADZY03000110.1||full__00018	S	4QAXV	YopX protein	-	-	-
Paenibacillus larvae	ADZY03000110.1||full	ADZY03000110.1||full__00035	0			-	-	-
Paenibacillus larvae	ADZY03000110.1||full	ADZY03000110.1||full__00037	0			-	-	-
Paenibacillus larvae	ADZY03000110.1||full	ADZY03000110.1||full__00038	0			-	-	-
Paenibacillus larvae	ADZY03000110.1||full	ADZY03000110.1||full__00013	S	32KGP	unknown	-	-	-
Paenibacillus larvae	ADZY03000110.1||full	ADZY03000110.1||full__00009	S	33BW7	Protein of unknwon function (DUF3310)	-	-	-
Paenibacillus larvae	ADZY03000110.1||full	ADZY03000110.1||full__00004	S	33G8I	unknown	-	-	-
Paenibacillus larvae	ADZY03000110.1||full	ADZY03000110.1||full__00003	0			-	-	-
Paenibacillus larvae	ADZY03000110.1||full	ADZY03000110.1||full__00029	0			-	-	-
Paenibacillus larvae	ADZY03000110.1||full	ADZY03000110.1||full__00006	Ph	-	-	phrog_353	toxin	Unspecified Moron
Paenibacillus larvae	ADZY03000110.1||full	ADZY03000110.1||full__00007	S	33BWX	unknown	-	-	-
Paenibacillus larvae	ADZY03000110.1||full	ADZY03000110.1||full__00030	0			-	-	-
Paenibacillus larvae	ADZY03000110.1||full	ADZY03000110.1||full__00039	0			-	-	-
Paenibacillus larvae	ADZY03000110.1||full	ADZY03000110.1||full__00033	0			-	-	-
Paenibacillus larvae	ADZY03000110.1||full	ADZY03000110.1||full__00032	0			-	-	-
Paenibacillus larvae	ADZY03000110.1||full	ADZY03000110.1||full__00027	0			-	-	-
Paenibacillus larvae	ADZY03000110.1||full	ADZY03000110.1||full__00021	0			-	-	-
Paenibacillus larvae	ADZY03000110.1||full	ADZY03000110.1||full__00015	0			-	-	-
Paenibacillus larvae	ADZY03000110.1||full	ADZY03000110.1||full__00001	Ph	-	-	phrog_361	terminase small subunit	-
Paenibacillus larvae	ADZY03000110.1||full	ADZY03000110.1||full__00008	Ph	-	-	phrog_36	transcriptional regulator	-
Paenibacillus larvae	ADZY03000110.1||full	ADZY03000110.1||full__00012	Ph	-	-	phrog_256	DNA helicase	-
Paenibacillus larvae	ADZY03000110.1||full	ADZY03000110.1||full__00023	Ph	-	-	phrog_112	Gp2.5-like ssDNA binding protein and ssDNA annealing protein	-
Paenibacillus larvae	ADZY03000110.1||full	ADZY03000110.1||full__00022	Ph	-	-	phrog_17	DNA polymerase	-
Paenibacillus larvae	ADZY03000110.1||full	ADZY03000110.1||full__00017	0			-	-	-
Paenibacillus larvae	ADZY03000110.1||full	ADZY03000110.1||full__00002	Ph	-	-	phrog_119	HNH endonuclease	-
Paenibacillus larvae	ADZY03000110.1||full	ADZY03000110.1||full__00016	0			-	-	-
Paenibacillus larvae	ADZY03000110.1||full	ADZY03000110.1||full__00019	0			-	-	-
Paenibacillus larvae	ADZY03000110.1||full	ADZY03000110.1||full__00020	S	2ZMF3	unknown	-	-	-
Paenibacillus larvae	ADZY03000119.1||full	ADZY03000119.1||full__00019	S	32XJQ	unknown	-	-	-
Paenibacillus larvae	ADZY03000119.1||full	ADZY03000119.1||full__00008	Ph	-	-	phrog_10250	terminase large subunit	-
Paenibacillus larvae	ADZY03000119.1||full	ADZY03000119.1||full__00006	0			-	-	-
Paenibacillus larvae	ADZY03000119.1||full	ADZY03000119.1||full__00014	S	2ZX3I	unknown	-	-	-
Paenibacillus larvae	ADZY03000119.1||full	ADZY03000119.1||full__00011	Ph	-	-	phrog_172	head scaffolding protein	-
Paenibacillus larvae	ADZY03000119.1||full	ADZY03000119.1||full__00016	Ph	-	-	phrog_176	tail terminator	-
Paenibacillus larvae	ADZY03000119.1||full	ADZY03000119.1||full__00001	S	30BXN	unknown	-	-	-
Paenibacillus larvae	ADZY03000119.1||full	ADZY03000119.1||full__00017	Ph	-	-	phrog_1407	major tail protein	-
Paenibacillus larvae	ADZY03000119.1||full	ADZY03000119.1||full__00002	Ph	-	-	phrog_36	transcriptional regulator	-
Paenibacillus larvae	ADZY03000119.1||full	ADZY03000119.1||full__00023	Ph	-	-	phrog_5339	virion structural protein	-
Paenibacillus larvae	ADZY03000119.1||full	ADZY03000119.1||full__00007	Ph	-	-	phrog_509	terminase small subunit	-
Paenibacillus larvae	ADZY03000119.1||full	ADZY03000119.1||full__00012	Ph	-	-	phrog_544	major head protein	-
Paenibacillus larvae	ADZY03000119.1||full	ADZY03000119.1||full__00026	Ph	-	-	phrog_199	holin	-
Paenibacillus larvae	ADZY03000119.1||full	ADZY03000119.1||full__00004	0			-	-	-
Paenibacillus larvae	ADZY03000119.1||full	ADZY03000119.1||full__00010	Ph	-	-	phrog_115	minor head protein	-
Paenibacillus larvae	ADZY03000119.1||full	ADZY03000119.1||full__00005	S	33670	unknown	-	-	-
Paenibacillus larvae	ADZY03000119.1||full	ADZY03000119.1||full__00003	S	33BWX	unknown	-	-	-
Paenibacillus larvae	ADZY03000119.1||full	ADZY03000119.1||full__00009	Ph	-	-	phrog_64	portal protein	-
Paenibacillus larvae	ADZY03000119.1||full	ADZY03000119.1||full__00020	Ph	-	-	phrog_58	tail length tape measure protein	-
Paenibacillus larvae	ADZY03000119.1||full	ADZY03000119.1||full__00025	S	4QEHA		-	-	-
Paenibacillus larvae	ADZY03000119.1||full	ADZY03000119.1||full__00013	Ph	-	-	phrog_132	head-tail adaptor	-
Paenibacillus larvae	ADZY03000119.1||full	ADZY03000119.1||full__00022	Ph	-	-	phrog_3558	tail protein	-
Paenibacillus larvae	ADZY03000119.1||full	ADZY03000119.1||full__00021	Ph	-	-	phrog_33	distal tail protein Dit	-
Paenibacillus larvae	ADZY03000119.1||full	ADZY03000119.1||full__00018	Ph	-	-	phrog_2115	tail protein	-
Paenibacillus larvae	ADZY03000119.1||full	ADZY03000119.1||full__00024	S	4QCNP		-	-	-
Paenibacillus larvae	ADZY03000119.1||full	ADZY03000119.1||full__00015	S	32YF3	unknown	-	-	-
Paenibacillus larvae	ADZY03000162.1||full	ADZY03000162.1||full__00012	Ph	-	-	phrog_115	minor head protein	-
Paenibacillus larvae	ADZY03000162.1||full	ADZY03000162.1||full__00001	S	349N1	unknown	-	-	-
Paenibacillus larvae	ADZY03000162.1||full	ADZY03000162.1||full__00013	Ph	-	-	phrog_194	head scaffolding protein	-
Paenibacillus larvae	ADZY03000162.1||full	ADZY03000162.1||full__00011	Ph	-	-	phrog_64	portal protein	-
Paenibacillus larvae	ADZY03000162.1||full	ADZY03000162.1||full__00017	Ph	-	-	phrog_615	head-tail adaptor	-
Paenibacillus larvae	ADZY03000162.1||full	ADZY03000162.1||full__00003	S	34A9H	unknown	-	-	-
Paenibacillus larvae	ADZY03000162.1||full	ADZY03000162.1||full__00009	Ph	-	-	phrog_509	terminase small subunit	-
Paenibacillus larvae	ADZY03000162.1||full	ADZY03000162.1||full__00015	Ph	-	-	phrog_29	major head protein	-
Paenibacillus larvae	ADZY03000162.1||full	ADZY03000162.1||full__00010	Ph	-	-	phrog_3717	terminase large subunit	-
Paenibacillus larvae	ADZY03000162.1||full	ADZY03000162.1||full__00007	0			-	-	-
Paenibacillus larvae	ADZY03000162.1||full	ADZY03000162.1||full__00002	L	2SGCR	DNA methylase	-	-	-
Paenibacillus larvae	ADZY03000162.1||full	ADZY03000162.1||full__00006	S	33BWX	unknown	-	-	-
Paenibacillus larvae	ADZY03000162.1||full	ADZY03000162.1||full__00028	Ph	-	-	phrog_400	tail protein	-
Paenibacillus larvae	ADZY03000162.1||full	ADZY03000162.1||full__00014	Ph	-	-	phrog_909	major head protein	-
Paenibacillus larvae	ADZY03000162.1||full	ADZY03000162.1||full__00008	0			-	-	-
Paenibacillus larvae	ADZY03000162.1||full	ADZY03000162.1||full__00029	S	33B66	Protein of unknown function (DUF2577)	-	-	-
Paenibacillus larvae	ADZY03000162.1||full	ADZY03000162.1||full__00004	0			-	-	-
Paenibacillus larvae	ADZY03000162.1||full	ADZY03000162.1||full__00024	Ph	-	-	phrog_389	tail protein XkdN-like	-
Paenibacillus larvae	ADZY03000162.1||full	ADZY03000162.1||full__00027	Ph	-	-	phrog_380	endolysin	-
Paenibacillus larvae	ADZY03000162.1||full	ADZY03000162.1||full__00020	S	32FG6	unknown	-	-	-
Paenibacillus larvae	ADZY03000162.1||full	ADZY03000162.1||full__00025	S	33MIG	unknown	-	-	-
Paenibacillus larvae	ADZY03000162.1||full	ADZY03000162.1||full__00018	Ph	-	-	phrog_5	tail completion or Neck1 protein	-
Paenibacillus larvae	ADZY03000162.1||full	ADZY03000162.1||full__00005	Ph	-	-	phrog_1190	RNA polymerase sigma factor	-
Paenibacillus larvae	ADZY03000162.1||full	ADZY03000162.1||full__00016	Ph	-	-	phrog_132	head-tail adaptor	-
Paenibacillus larvae	ADZY03000162.1||full	ADZY03000162.1||full__00026	Ph	-	-	phrog_1068	tail length tape measure protein	-
Paenibacillus larvae	ADZY03000162.1||full	ADZY03000162.1||full__00021	Ph	-	-	phrog_279	tail sheath	-
Paenibacillus larvae	ADZY03000162.1||full	ADZY03000162.1||full__00019	S	32YNZ	unknown	-	-	-
Paenibacillus larvae	ADZY03000162.1||full	ADZY03000162.1||full__00022	Ph	-	-		NA	-
Paenibacillus larvae	ADZY03000162.1||full	ADZY03000162.1||full__00030	Ph	-	-	phrog_120	baseplate wedge subunit	-
Paenibacillus larvae	ADZY03000162.1||full	ADZY03000162.1||full__00023	Ph	-	-	phrog_365	tail protein	-
Paenibacillus larvae	ADZY03000211.1||full_1	ADZY03000211.1||full_1__00003	Ph	-	-	phrog_18248	transcriptional regulator	-
Paenibacillus larvae	ADZY03000211.1||full_1	ADZY03000211.1||full_1__00009	0			-	-	-
Paenibacillus larvae	ADZY03000211.1||full_1	ADZY03000211.1||full_1__00008	0			-	-	-
Paenibacillus larvae	ADZY03000211.1||full_1	ADZY03000211.1||full_1__00006	S	33M1V	unknown	-	-	-
Paenibacillus larvae	ADZY03000211.1||full_1	ADZY03000211.1||full_1__00001	U	COG4473	ABC transporter	-	-	-
Paenibacillus larvae	ADZY03000211.1||full_1	ADZY03000211.1||full_1__00005	Ph	-	-	phrog_63	anti-repressor Ant	-
Paenibacillus larvae	ADZY03000211.1||full_1	ADZY03000211.1||full_1__00007	Ph	-	-	phrog_373	anti-repressor	-
Paenibacillus larvae	ADZY03000211.1||full_1	ADZY03000211.1||full_1__00002	Ph	-	-	phrog_1	integrase	-
Paenibacillus larvae	ADZY03000211.1||full_1	ADZY03000211.1||full_1__00004	Ph	-	-	phrog_1468	transcriptional repressor	-
Paenibacillus larvae	ADZY03000211.1||full_1	ADZY03000211.1||full_1__00010	0			-	-	-
Paenibacillus larvae	ADZY03000216.1||full	ADZY03000216.1||full__00006	Ph	-	-	phrog_1407	major tail protein	-
Paenibacillus larvae	ADZY03000216.1||full	ADZY03000216.1||full__00003	Ph	-	-	phrog_25	head closure Hc1	-
Paenibacillus larvae	ADZY03000216.1||full	ADZY03000216.1||full__00008	S	32XJQ	unknown	-	-	-
Paenibacillus larvae	ADZY03000216.1||full	ADZY03000216.1||full__00004	Ph	-	-	phrog_5	tail completion or Neck1 protein	-
Paenibacillus larvae	ADZY03000216.1||full	ADZY03000216.1||full__00009	Ph	-	-	phrog_1272	tail length tape measure protein	-
Paenibacillus larvae	ADZY03000216.1||full	ADZY03000216.1||full__00002	Ph	-	-	phrog_40	head-tail adaptor Ad1	-
Paenibacillus larvae	ADZY03000216.1||full	ADZY03000216.1||full__00007	0			-	-	-
Paenibacillus larvae	ADZY03000216.1||full	ADZY03000216.1||full__00005	Ph	-	-	phrog_176	tail terminator	-
Paenibacillus larvae	ADZY03000216.1||full	ADZY03000216.1||full__00001	Ph	-	-	phrog_10	major head protein	-
Paenibacillus larvae	ADZY03000221.1||full	ADZY03000221.1||full__00004	S	30E2J	unknown	-	-	-
Paenibacillus larvae	ADZY03000221.1||full	ADZY03000221.1||full__00003	S	33R24	unknown	-	-	-
Paenibacillus larvae	ADZY03000221.1||full	ADZY03000221.1||full__00002	Ph	-	-	phrog_1299	holin	-
Paenibacillus larvae	ADZY03000221.1||full	ADZY03000221.1||full__00005	0			-	-	-
Paenibacillus larvae	ADZY03000221.1||full	ADZY03000221.1||full__00001	S	4QCCA		-	-	-
Paenibacillus larvae	ADZY03000221.1||full	ADZY03000221.1||full__00006	Ph	-	-	phrog_37443	toxin	Unspecified Moron
Paenibacillus larvae	ADZY03000229.1||full	ADZY03000229.1||full__00002	Ph	-	-	phrog_4691	excisionase	-
Paenibacillus larvae	ADZY03000229.1||full	ADZY03000229.1||full__00003	S	339UU	unknown	-	-	-
Paenibacillus larvae	ADZY03000229.1||full	ADZY03000229.1||full__00005	L	2S3P9	C-5 cytosine-specific DNA methylase	-	-	-
Paenibacillus larvae	ADZY03000229.1||full	ADZY03000229.1||full__00006	L	COG4646	helicase C-terminal domain protein	-	-	-
Paenibacillus larvae	ADZY03000229.1||full	ADZY03000229.1||full__00011	0			-	-	-
Paenibacillus larvae	ADZY03000229.1||full	ADZY03000229.1||full__00009	S	344MR	unknown	-	-	-
Paenibacillus larvae	ADZY03000229.1||full	ADZY03000229.1||full__00004	Ph	-	-	phrog_3512	sigma factor	-
Paenibacillus larvae	ADZY03000229.1||full	ADZY03000229.1||full__00001	S	30DEH	Helix-turn-helix domain	-	-	-
Paenibacillus larvae	ADZY03000229.1||full	ADZY03000229.1||full__00008	S	4QH1I	kinase activity	-	-	-
Paenibacillus larvae	ADZY03000229.1||full	ADZY03000229.1||full__00010	Ph	-	-	phrog_1281	NA	-
Paenibacillus larvae	ADZY03000229.1||full	ADZY03000229.1||full__00007	S	3427Z	unknown	-	-	-
Paenibacillus larvae	ADZY03000229.1||full	ADZY03000229.1||full__00012	S	344MB	unknown	-	-	-
Paenibacillus larvae	ADZY03000285.1||full	ADZY03000285.1||full__00009	0			-	-	-
Paenibacillus larvae	ADZY03000285.1||full	ADZY03000285.1||full__00012	S	4QEW8		-	-	-
Paenibacillus larvae	ADZY03000285.1||full	ADZY03000285.1||full__00015	Ph	-	-	phrog_7370	HNH endonuclease	-
Paenibacillus larvae	ADZY03000285.1||full	ADZY03000285.1||full__00013	S	2ZA3S	unknown	-	-	-
Paenibacillus larvae	ADZY03000285.1||full	ADZY03000285.1||full__00008	0			-	-	-
Paenibacillus larvae	ADZY03000285.1||full	ADZY03000285.1||full__00002	0			-	-	-
Paenibacillus larvae	ADZY03000285.1||full	ADZY03000285.1||full__00010	S	30R40	unknown	-	-	-
Paenibacillus larvae	ADZY03000285.1||full	ADZY03000285.1||full__00004	0			-	-	-
Paenibacillus larvae	ADZY03000285.1||full	ADZY03000285.1||full__00007	0			-	-	-
Paenibacillus larvae	ADZY03000285.1||full	ADZY03000285.1||full__00011	S	313RY	Protein of unknown function (DUF1256)	-	-	-
Paenibacillus larvae	ADZY03000285.1||full	ADZY03000285.1||full__00001	Ph	-	-	phrog_4681	antitoxin from a toxin-antitoxin system	Unspecified Moron
Paenibacillus larvae	ADZY03000285.1||full	ADZY03000285.1||full__00016	Ph	-	-	phrog_9474	replication initiation protein	-
Paenibacillus larvae	ADZY03000285.1||full	ADZY03000285.1||full__00005	0			-	-	-
Paenibacillus larvae	ADZY03000285.1||full	ADZY03000285.1||full__00014	Ph	-	-	phrog_1227	exonuclease	-
Paenibacillus larvae	ADZY03000285.1||full	ADZY03000285.1||full__00003	Ph	-	-	phrog_130	anti-repressor Ant	-
Paenibacillus larvae	ADZY03000285.1||full	ADZY03000285.1||full__00006	Ph	-	-	phrog_1760	anti-repressor	-
Paenibacillus larvae	ADZY03000294.1||full	ADZY03000294.1||full__00001	Ph	-	-	phrog_353	toxin	Unspecified Moron
Paenibacillus larvae	ADZY03000294.1||full	ADZY03000294.1||full__00016	Ph	-	-	phrog_55	head closure	-
Paenibacillus larvae	ADZY03000294.1||full	ADZY03000294.1||full__00012	Ph	-	-	phrog_27	tail completion or Neck1 protein	-
Paenibacillus larvae	ADZY03000294.1||full	ADZY03000294.1||full__00026	Ph	-	-	phrog_7037	tail fiber protein	-
Paenibacillus larvae	ADZY03000294.1||full	ADZY03000294.1||full__00009	Ph	-	-	phrog_29	major head protein	-
Paenibacillus larvae	ADZY03000294.1||full	ADZY03000294.1||full__00011	Ph	-	-	phrog_2551	minor tail protein	-
Paenibacillus larvae	ADZY03000294.1||full	ADZY03000294.1||full__00024	Ph	-	-	phrog_6	baseplate wedge subunit	-
Paenibacillus larvae	ADZY03000294.1||full	ADZY03000294.1||full__00022	Ph	-	-	phrog_76	tail protein	-
Paenibacillus larvae	ADZY03000294.1||full	ADZY03000294.1||full__00017	Ph	-	-	phrog_3140	tail assembly chaperone	-
Paenibacillus larvae	ADZY03000294.1||full	ADZY03000294.1||full__00015	Ph	-	-	phrog_23	tail sheath	-
Paenibacillus larvae	ADZY03000294.1||full	ADZY03000294.1||full__00007	Ph	-	-	phrog_94	head maturation protease	-
Paenibacillus larvae	ADZY03000294.1||full	ADZY03000294.1||full__00018	Ph	-	-	phrog_991	tail length tape measure protein	-
Paenibacillus larvae	ADZY03000294.1||full	ADZY03000294.1||full__00010	0			-	-	-
Paenibacillus larvae	ADZY03000294.1||full	ADZY03000294.1||full__00028	S	4QEHA		-	-	-
Paenibacillus larvae	ADZY03000294.1||full	ADZY03000294.1||full__00013	Ph	-	-	phrog_2581	virion structural protein	-
Paenibacillus larvae	ADZY03000294.1||full	ADZY03000294.1||full__00002	L	COG0863	Belongs to the N(4) N(6)-methyltransferase family	-	-	-
Paenibacillus larvae	ADZY03000294.1||full	ADZY03000294.1||full__00020	Ph	-	-	phrog_52	tail protein	-
Paenibacillus larvae	ADZY03000294.1||full	ADZY03000294.1||full__00027	S	4QCNP		-	-	-
Paenibacillus larvae	ADZY03000294.1||full	ADZY03000294.1||full__00005	Ph	-	-	phrog_118	head-tail adaptor	-
Paenibacillus larvae	ADZY03000294.1||full	ADZY03000294.1||full__00008	Ph	-	-	phrog_49	head decoration	-
Paenibacillus larvae	ADZY03000294.1||full	ADZY03000294.1||full__00004	Ph	-	-	phrog_15	terminase large subunit	-
Paenibacillus larvae	ADZY03000294.1||full	ADZY03000294.1||full__00021	Ph	-	-	phrog_6142	baseplate assembly protein	-
Paenibacillus larvae	ADZY03000294.1||full	ADZY03000294.1||full__00029	Ph	-	-	phrog_2429	involved in bacteriocin production or immunity	Unspecified Moron
Paenibacillus larvae	ADZY03000294.1||full	ADZY03000294.1||full__00014	S	33A8W	unknown	-	-	-
Paenibacillus larvae	ADZY03000294.1||full	ADZY03000294.1||full__00019	Ph	-	-	phrog_46	baseplate hub	-
Paenibacillus larvae	ADZY03000294.1||full	ADZY03000294.1||full__00003	Ph	-	-	phrog_57	terminase small subunit	-
Paenibacillus larvae	ADZY03000294.1||full	ADZY03000294.1||full__00025	Ph	-	-	phrog_14404	baseplate protein	-
Paenibacillus larvae	ADZY03000294.1||full	ADZY03000294.1||full__00006	Ph	-	-	phrog_21	portal protein	-
Paenibacillus larvae	ADZY03000294.1||full	ADZY03000294.1||full__00023	Ph	-	-	phrog_43	baseplate wedge subunit	-
Paenibacillus larvae	ADZY03000319.1||full_1	ADZY03000319.1||full_1__00003	S	33JGF	unknown	-	-	-
Paenibacillus larvae	ADZY03000319.1||full_1	ADZY03000319.1||full_1__00031	Ph	-	-	phrog_192	DNA polymerase exonuclease subunit	-
Paenibacillus larvae	ADZY03000319.1||full_1	ADZY03000319.1||full_1__00019	Ph	-	-	phrog_20486	DNA binding protein	-
Paenibacillus larvae	ADZY03000319.1||full_1	ADZY03000319.1||full_1__00028	0			-	-	-
Paenibacillus larvae	ADZY03000319.1||full_1	ADZY03000319.1||full_1__00033	Ph	-	-	phrog_159	RuvC-like Holliday junction resolvase	-
Paenibacillus larvae	ADZY03000319.1||full_1	ADZY03000319.1||full_1__00010	S	3376A	Protein of unknown function (DUF3102)	-	-	-
Paenibacillus larvae	ADZY03000319.1||full_1	ADZY03000319.1||full_1__00011	0			-	-	-
Paenibacillus larvae	ADZY03000319.1||full_1	ADZY03000319.1||full_1__00036	0			-	-	-
Paenibacillus larvae	ADZY03000319.1||full_1	ADZY03000319.1||full_1__00015	Ph	-	-	phrog_19	DnaB-like replicative helicase	-
Paenibacillus larvae	ADZY03000319.1||full_1	ADZY03000319.1||full_1__00006	Ph	-	-	phrog_12720	DNA binding protein	-
Paenibacillus larvae	ADZY03000319.1||full_1	ADZY03000319.1||full_1__00032	Ph	-	-	phrog_1706	CRISPR/Cas system associated	-
Paenibacillus larvae	ADZY03000319.1||full_1	ADZY03000319.1||full_1__00012	0			-	-	-
Paenibacillus larvae	ADZY03000319.1||full_1	ADZY03000319.1||full_1__00021	S	33BWX	unknown	-	-	-
Paenibacillus larvae	ADZY03000319.1||full_1	ADZY03000319.1||full_1__00014	Ph	-	-	phrog_50	DnaC-like helicase loader	-
Paenibacillus larvae	ADZY03000319.1||full_1	ADZY03000319.1||full_1__00035	Ph	-	-	phrog_135	dUTPase	-
Paenibacillus larvae	ADZY03000319.1||full_1	ADZY03000319.1||full_1__00024	0			-	-	-
Paenibacillus larvae	ADZY03000319.1||full_1	ADZY03000319.1||full_1__00007	S	2ZPT8	unknown	-	-	-
Paenibacillus larvae	ADZY03000319.1||full_1	ADZY03000319.1||full_1__00005	S	30R40	unknown	-	-	-
Paenibacillus larvae	ADZY03000319.1||full_1	ADZY03000319.1||full_1__00001	S	34AHR	Helix-turn-helix domain	-	-	-
Paenibacillus larvae	ADZY03000319.1||full_1	ADZY03000319.1||full_1__00016	Ph	-	-	phrog_47	DNA primase	-
Paenibacillus larvae	ADZY03000319.1||full_1	ADZY03000319.1||full_1__00025	S	2ZHNQ	unknown	-	-	-
Paenibacillus larvae	ADZY03000319.1||full_1	ADZY03000319.1||full_1__00022	0			-	-	-
Paenibacillus larvae	ADZY03000319.1||full_1	ADZY03000319.1||full_1__00017	S	30DQ3	unknown	-	-	-
Paenibacillus larvae	ADZY03000319.1||full_1	ADZY03000319.1||full_1__00030	0			-	-	-
Paenibacillus larvae	ADZY03000319.1||full_1	ADZY03000319.1||full_1__00013	0			-	-	-
Paenibacillus larvae	ADZY03000319.1||full_1	ADZY03000319.1||full_1__00034	0			-	-	-
Paenibacillus larvae	ADZY03000319.1||full_1	ADZY03000319.1||full_1__00008	S	303VI	unknown	-	-	-
Paenibacillus larvae	ADZY03000319.1||full_1	ADZY03000319.1||full_1__00020	0			-	-	-
Paenibacillus larvae	ADZY03000319.1||full_1	ADZY03000319.1||full_1__00002	0			-	-	-
Paenibacillus larvae	ADZY03000319.1||full_1	ADZY03000319.1||full_1__00023	S	340HJ	unknown	-	-	-
Paenibacillus larvae	ADZY03000319.1||full_1	ADZY03000319.1||full_1__00027	Ph	-	-	phrog_12241	DNA polymerase	-
Paenibacillus larvae	ADZY03000319.1||full_1	ADZY03000319.1||full_1__00026	Ph	-	-	phrog_12241	DNA polymerase	-
Paenibacillus larvae	ADZY03000319.1||full_1	ADZY03000319.1||full_1__00009	S	33J00	unknown	-	-	-
Paenibacillus larvae	ADZY03000319.1||full_1	ADZY03000319.1||full_1__00029	Ph	-	-	phrog_10285	DNA polymerase	-
Paenibacillus larvae	ADZY03000319.1||full_1	ADZY03000319.1||full_1__00004	0			-	-	-
Paenibacillus larvae	ADZY03000319.1||full_1	ADZY03000319.1||full_1__00018	S	2ZJSU	unknown	-	-	-
Paenibacillus larvae	ADZY03000321.1||full	ADZY03000321.1||full__00011	S	32FG6	unknown	-	-	-
Paenibacillus larvae	ADZY03000321.1||full	ADZY03000321.1||full__00018	S	33B66	Protein of unknown function (DUF2577)	-	-	-
Paenibacillus larvae	ADZY03000321.1||full	ADZY03000321.1||full__00008	Ph	-	-	phrog_248	transcriptional activator	-
Paenibacillus larvae	ADZY03000321.1||full	ADZY03000321.1||full__00002	0			-	-	-
Paenibacillus larvae	ADZY03000321.1||full	ADZY03000321.1||full__00014	Ph	-	-	phrog_389	tail protein XkdN-like	-
Paenibacillus larvae	ADZY03000321.1||full	ADZY03000321.1||full__00009	S	3375J	unknown	-	-	-
Paenibacillus larvae	ADZY03000321.1||full	ADZY03000321.1||full__00019	Ph	-	-	phrog_120	baseplate wedge subunit	-
Paenibacillus larvae	ADZY03000321.1||full	ADZY03000321.1||full__00022	S	33NU8	unknown	-	-	-
Paenibacillus larvae	ADZY03000321.1||full	ADZY03000321.1||full__00006	S	4QCCB	Pfam:Peptidase_M78	-	-	-
Paenibacillus larvae	ADZY03000321.1||full	ADZY03000321.1||full__00007	Ph	-	-	phrog_8	transcriptional regulator	-
Paenibacillus larvae	ADZY03000321.1||full	ADZY03000321.1||full__00017	Ph	-	-	phrog_400	tail protein	-
Paenibacillus larvae	ADZY03000321.1||full	ADZY03000321.1||full__00001	0			-	-	-
Paenibacillus larvae	ADZY03000321.1||full	ADZY03000321.1||full__00021	Ph	-	-	phrog_521	tail protein	-
Paenibacillus larvae	ADZY03000321.1||full	ADZY03000321.1||full__00010	S	32YNZ	unknown	-	-	-
Paenibacillus larvae	ADZY03000321.1||full	ADZY03000321.1||full__00003	S	COG3081	Nucleoid-associated protein	-	-	-
Paenibacillus larvae	ADZY03000321.1||full	ADZY03000321.1||full__00013	Ph	-	-	phrog_365	tail protein	-
Paenibacillus larvae	ADZY03000321.1||full	ADZY03000321.1||full__00020	Ph	-	-	phrog_6	baseplate wedge subunit	-
Paenibacillus larvae	ADZY03000321.1||full	ADZY03000321.1||full__00015	Ph	-	-	phrog_1068	tail length tape measure protein	-
Paenibacillus larvae	ADZY03000321.1||full	ADZY03000321.1||full__00012	Ph	-	-	phrog_279	tail sheath	-
Paenibacillus larvae	ADZY03000321.1||full	ADZY03000321.1||full__00004	S	2ZAKU	Psort location CytoplasmicMembrane, score	-	-	-
Paenibacillus larvae	ADZY03000321.1||full	ADZY03000321.1||full__00005	S	3375J	unknown	-	-	-
Paenibacillus larvae	ADZY03000321.1||full	ADZY03000321.1||full__00023	Ph	-	-	phrog_26419	tail fiber protein	-
Paenibacillus larvae	ADZY03000321.1||full	ADZY03000321.1||full__00016	Ph	-	-	phrog_380	endolysin	-
Paenibacillus larvae	ADZY03000328.1||full	ADZY03000328.1||full__00003	Ph	-	-	phrog_33	distal tail protein Dit	-
Paenibacillus larvae	ADZY03000328.1||full	ADZY03000328.1||full__00004	Ph	-	-	phrog_1272	tail length tape measure protein	-
Paenibacillus larvae	ADZY03000328.1||full	ADZY03000328.1||full__00001	0			-	-	-
Paenibacillus larvae	ADZY03000328.1||full	ADZY03000328.1||full__00002	Ph	-	-	phrog_538	minor tail protein	-
Paenibacillus larvae	ADZY03000352.1||full	ADZY03000352.1||full__00012	S	33I1I	unknown	-	-	-
Paenibacillus larvae	ADZY03000352.1||full	ADZY03000352.1||full__00003	Ph	-	-	phrog_248	transcriptional activator	-
Paenibacillus larvae	ADZY03000352.1||full	ADZY03000352.1||full__00009	S	33ART	YopX protein	-	-	-
Paenibacillus larvae	ADZY03000352.1||full	ADZY03000352.1||full__00011	0			-	-	-
Paenibacillus larvae	ADZY03000352.1||full	ADZY03000352.1||full__00010	0			-	-	-
Paenibacillus larvae	ADZY03000352.1||full	ADZY03000352.1||full__00014	Ph	-	-	phrog_19	DnaB-like replicative helicase	-
Paenibacillus larvae	ADZY03000352.1||full	ADZY03000352.1||full__00005	Ph	-	-	phrog_154	replication initiation protein	-
Paenibacillus larvae	ADZY03000352.1||full	ADZY03000352.1||full__00007	S	4QBPM		-	-	-
Paenibacillus larvae	ADZY03000352.1||full	ADZY03000352.1||full__00002	S	33BWX	unknown	-	-	-
Paenibacillus larvae	ADZY03000352.1||full	ADZY03000352.1||full__00013	S	4QGFE		-	-	-
Paenibacillus larvae	ADZY03000352.1||full	ADZY03000352.1||full__00004	S	4QDAG		-	-	-
Paenibacillus larvae	ADZY03000352.1||full	ADZY03000352.1||full__00001	Ph	-	-	phrog_497	toxin-antitoxin system HicB-like	Unspecified Moron
Paenibacillus larvae	ADZY03000352.1||full	ADZY03000352.1||full__00006	Ph	-	-	phrog_159	RuvC-like Holliday junction resolvase	-
Paenibacillus larvae	ADZY03000352.1||full	ADZY03000352.1||full__00008	0			-	-	-
Melissococcus plutonius	AP018492.1||0_partial_1	AP018492.1||0_partial_1__00008	0			-	-	-
Melissococcus plutonius	AP018492.1||0_partial_1	AP018492.1||0_partial_1__00004	0			-	-	-
Melissococcus plutonius	AP018492.1||0_partial_1	AP018492.1||0_partial_1__00023	Ph	-	-	phrog_881	holin	-
Melissococcus plutonius	AP018492.1||0_partial_1	AP018492.1||0_partial_1__00002	Ph	-	-	phrog_4	transcriptional repressor	-
Melissococcus plutonius	AP018492.1||0_partial_1	AP018492.1||0_partial_1__00019	S	33GJ2	unknown	-	-	-
Melissococcus plutonius	AP018492.1||0_partial_1	AP018492.1||0_partial_1__00021	S	306QY	unknown	-	-	-
Melissococcus plutonius	AP018492.1||0_partial_1	AP018492.1||0_partial_1__00022	Ph	-	-	phrog_2429	involved in bacteriocin production or immunity	Unspecified Moron
Melissococcus plutonius	AP018492.1||0_partial_1	AP018492.1||0_partial_1__00011	Ph	-	-	phrog_176	tail terminator	-
Melissococcus plutonius	AP018492.1||0_partial_1	AP018492.1||0_partial_1__00015	Ph	-	-	phrog_58	tail length tape measure protein	-
Melissococcus plutonius	AP018492.1||0_partial_1	AP018492.1||0_partial_1__00009	0			-	-	-
Melissococcus plutonius	AP018492.1||0_partial_1	AP018492.1||0_partial_1__00001	S	346VS	unknown	-	-	-
Melissococcus plutonius	AP018492.1||0_partial_1	AP018492.1||0_partial_1__00010	Ph	-	-	phrog_172	head scaffolding protein	-
Melissococcus plutonius	AP018492.1||0_partial_1	AP018492.1||0_partial_1__00013	Ph	-	-	phrog_183	tail chaperone protein	-
Melissococcus plutonius	AP018492.1||0_partial_1	AP018492.1||0_partial_1__00020	S	2ZPVI	unknown	-	-	-
Melissococcus plutonius	AP018492.1||0_partial_1	AP018492.1||0_partial_1__00018	Ph	-	-	phrog_6042	minor head protein	-
Melissococcus plutonius	AP018492.1||0_partial_1	AP018492.1||0_partial_1__00024	Ph	-	-	phrog_998	endolysin	-
Melissococcus plutonius	AP018492.1||0_partial_1	AP018492.1||0_partial_1__00006	Ph	-	-	phrog_36	transcriptional regulator	-
Melissococcus plutonius	AP018492.1||0_partial_1	AP018492.1||0_partial_1__00005	S	306CX	unknown	-	-	-
Melissococcus plutonius	AP018492.1||0_partial_1	AP018492.1||0_partial_1__00003	K	33EHJ	unknown	-	-	-
Melissococcus plutonius	AP018492.1||0_partial_1	AP018492.1||0_partial_1__00017	Ph	-	-	phrog_1067	minor head protein	-
Melissococcus plutonius	AP018492.1||0_partial_1	AP018492.1||0_partial_1__00016	Ph	-	-	phrog_5163	minor tail protein	-
Melissococcus plutonius	AP018492.1||0_partial_1	AP018492.1||0_partial_1__00007	M	2QSUT	Right handed beta helix region	-	-	-
Melissococcus plutonius	AP018492.1||0_partial_1	AP018492.1||0_partial_1__00014	Ph	-	-	phrog_441	tail assembly chaperone	-
Melissococcus plutonius	AP018492.1||0_partial_1	AP018492.1||0_partial_1__00012	Ph	-	-	phrog_238	major tail protein	-
Snodgrassella alvi	AVQL01000428.1||full_1	AVQL01000428.1||full_1__00005	Ph	-	-	phrog_48	tail protein	-
Snodgrassella alvi	AVQL01000428.1||full_1	AVQL01000428.1||full_1__00003	Ph	-	-	phrog_43	baseplate wedge subunit	-
Snodgrassella alvi	AVQL01000428.1||full_1	AVQL01000428.1||full_1__00007	Ph	-	-	phrog_105	tail fiber assembly	-
Snodgrassella alvi	AVQL01000428.1||full_1	AVQL01000428.1||full_1__00004	Ph	-	-	phrog_6	baseplate wedge subunit	-
Snodgrassella alvi	AVQL01000428.1||full_1	AVQL01000428.1||full_1__00006	S	4QGUT		-	-	-
Snodgrassella alvi	AVQL01000428.1||full_1	AVQL01000428.1||full_1__00002	Ph	-	-	phrog_9992	baseplate assembly protein	-
Snodgrassella alvi	AVQL01000428.1||full_1	AVQL01000428.1||full_1__00001	Ph	-	-	phrog_52	tail protein	-
Snodgrassella alvi	AVQL01000451.1||full_1	AVQL01000451.1||full_1__00014	Ph	-	-	phrog_678	replication initiation O-like	-
Snodgrassella alvi	AVQL01000451.1||full_1	AVQL01000451.1||full_1__00011	Ph	-	-	phrog_4	transcriptional repressor	-
Snodgrassella alvi	AVQL01000451.1||full_1	AVQL01000451.1||full_1__00008	Ph	-	-	phrog_659	Sak-like ssDNA annealing protein	-
Snodgrassella alvi	AVQL01000451.1||full_1	AVQL01000451.1||full_1__00038	S	317FK	unknown	-	-	-
Snodgrassella alvi	AVQL01000451.1||full_1	AVQL01000451.1||full_1__00045	S	COG3514	BrnA antitoxin of type II toxin-antitoxin system	-	-	-
Snodgrassella alvi	AVQL01000451.1||full_1	AVQL01000451.1||full_1__00046	Ph	-	-	phrog_1259	baseplate hub subunit and tail lysozyme	-
Snodgrassella alvi	AVQL01000451.1||full_1	AVQL01000451.1||full_1__00028	Ph	-	-	phrog_40	head-tail adaptor Ad1	-
Snodgrassella alvi	AVQL01000451.1||full_1	AVQL01000451.1||full_1__00012	Ph	-	-	phrog_8008	DNA binding protein	-
Snodgrassella alvi	AVQL01000451.1||full_1	AVQL01000451.1||full_1__00006	Ph	-	-	phrog_724	exonuclease recombination-associated	-
Snodgrassella alvi	AVQL01000451.1||full_1	AVQL01000451.1||full_1__00041	0			-	-	-
Snodgrassella alvi	AVQL01000451.1||full_1	AVQL01000451.1||full_1__00003	S	32FQR	unknown	-	-	-
Snodgrassella alvi	AVQL01000451.1||full_1	AVQL01000451.1||full_1__00015	Ph	-	-	phrog_50	DnaC-like helicase loader	-
Snodgrassella alvi	AVQL01000451.1||full_1	AVQL01000451.1||full_1__00001	S	30RJN	unknown	-	-	-
Snodgrassella alvi	AVQL01000451.1||full_1	AVQL01000451.1||full_1__00043	S	33H0Q	unknown	-	-	-
Snodgrassella alvi	AVQL01000451.1||full_1	AVQL01000451.1||full_1__00017	Ph	-	-	phrog_72	NinB/ Orf homologous recombination mediator	-
Snodgrassella alvi	AVQL01000451.1||full_1	AVQL01000451.1||full_1__00007	Ph	-	-	phrog_149	exonuclease	-
Snodgrassella alvi	AVQL01000451.1||full_1	AVQL01000451.1||full_1__00019	0			-	-	-
Snodgrassella alvi	AVQL01000451.1||full_1	AVQL01000451.1||full_1__00005	0			-	-	-
Snodgrassella alvi	AVQL01000451.1||full_1	AVQL01000451.1||full_1__00025	Ph	-	-	phrog_12	portal protein	-
Snodgrassella alvi	AVQL01000451.1||full_1	AVQL01000451.1||full_1__00024	Ph	-	-	phrog_9	terminase large subunit	-
Snodgrassella alvi	AVQL01000451.1||full_1	AVQL01000451.1||full_1__00029	Ph	-	-	phrog_25	head closure Hc1	-
Snodgrassella alvi	AVQL01000451.1||full_1	AVQL01000451.1||full_1__00016	Ph	-	-	phrog_171	NinG/ Rap DNA junction specific endonuclease	-
Snodgrassella alvi	AVQL01000451.1||full_1	AVQL01000451.1||full_1__00044	Ph	-	-	phrog_4399	ribonuclease toxin of AT system	Unspecified Moron
Snodgrassella alvi	AVQL01000451.1||full_1	AVQL01000451.1||full_1__00032	Ph	-	-	phrog_584	major tail protein	-
Snodgrassella alvi	AVQL01000451.1||full_1	AVQL01000451.1||full_1__00040	0			-	-	-
Snodgrassella alvi	AVQL01000451.1||full_1	AVQL01000451.1||full_1__00037	S	34A5Z	unknown	-	-	-
Snodgrassella alvi	AVQL01000451.1||full_1	AVQL01000451.1||full_1__00034	0			-	-	-
Snodgrassella alvi	AVQL01000451.1||full_1	AVQL01000451.1||full_1__00004	S	4QB07		-	-	-
Snodgrassella alvi	AVQL01000451.1||full_1	AVQL01000451.1||full_1__00042	S	32UHQ	unknown	-	-	-
Snodgrassella alvi	AVQL01000451.1||full_1	AVQL01000451.1||full_1__00021	0			-	-	-
Snodgrassella alvi	AVQL01000451.1||full_1	AVQL01000451.1||full_1__00022	Ph	-	-	phrog_589	HNH endonuclease	-
Snodgrassella alvi	AVQL01000451.1||full_1	AVQL01000451.1||full_1__00030	Ph	-	-	phrog_5	tail completion or Neck1 protein	-
Snodgrassella alvi	AVQL01000451.1||full_1	AVQL01000451.1||full_1__00026	Ph	-	-	phrog_80	head maturation protease	-
Snodgrassella alvi	AVQL01000451.1||full_1	AVQL01000451.1||full_1__00027	Ph	-	-	phrog_10	major head protein	-
Snodgrassella alvi	AVQL01000451.1||full_1	AVQL01000451.1||full_1__00039	0			-	-	-
Snodgrassella alvi	AVQL01000451.1||full_1	AVQL01000451.1||full_1__00018	0			-	-	-
Snodgrassella alvi	AVQL01000451.1||full_1	AVQL01000451.1||full_1__00002	0			-	-	-
Snodgrassella alvi	AVQL01000451.1||full_1	AVQL01000451.1||full_1__00013	S	33DHF	Helix-turn-helix domain	-	-	-
Snodgrassella alvi	AVQL01000451.1||full_1	AVQL01000451.1||full_1__00020	L	COG3392	D12 class N6 adenine-specific DNA methyltransferase	-	-	-
Snodgrassella alvi	AVQL01000451.1||full_1	AVQL01000451.1||full_1__00009	0			-	-	-
Snodgrassella alvi	AVQL01000451.1||full_1	AVQL01000451.1||full_1__00048	0			-	-	-
Snodgrassella alvi	AVQL01000451.1||full_1	AVQL01000451.1||full_1__00031	S	32USX	Protein of unknown function (DUF3168)	-	-	-
Snodgrassella alvi	AVQL01000451.1||full_1	AVQL01000451.1||full_1__00035	0			-	-	-
Snodgrassella alvi	AVQL01000451.1||full_1	AVQL01000451.1||full_1__00010	S	337GM	unknown	-	-	-
Snodgrassella alvi	AVQL01000451.1||full_1	AVQL01000451.1||full_1__00033	0			-	-	-
Snodgrassella alvi	AVQL01000451.1||full_1	AVQL01000451.1||full_1__00023	Ph	-	-	phrog_641	terminase small subunit	-
Snodgrassella alvi	AVQL01000451.1||full_1	AVQL01000451.1||full_1__00047	0			-	-	-
Snodgrassella alvi	AVQL01000451.1||full_1	AVQL01000451.1||full_1__00036	Ph	-	-	phrog_339	tail length tape measure protein	-
Lactobacillus kunkeei	AZBY01000020.1||0_partial	AZBY01000020.1||0_partial__00016	Ph	-	-	phrog_2606	terminase small subunit	-
Lactobacillus kunkeei	AZBY01000020.1||0_partial	AZBY01000020.1||0_partial__00011	Ph	-	-	phrog_50	DnaC-like helicase loader	-
Lactobacillus kunkeei	AZBY01000020.1||0_partial	AZBY01000020.1||0_partial__00003	K	COG3655	Transcriptional regulator	-	-	-
Lactobacillus kunkeei	AZBY01000020.1||0_partial	AZBY01000020.1||0_partial__00019	S	COG4990	cell redox homeostasis	-	-	-
Lactobacillus kunkeei	AZBY01000020.1||0_partial	AZBY01000020.1||0_partial__00006	Ph	-	-	phrog_2657	transcriptional regulator	-
Lactobacillus kunkeei	AZBY01000020.1||0_partial	AZBY01000020.1||0_partial__00012	S	30KIR	Domain of unknown function (DUF5067)	-	-	-
Lactobacillus kunkeei	AZBY01000020.1||0_partial	AZBY01000020.1||0_partial__00017	S	32NA3	unknown	-	-	-
Lactobacillus kunkeei	AZBY01000020.1||0_partial	AZBY01000020.1||0_partial__00013	Ph	-	-	phrog_167	tail length tape measure protein	-
Lactobacillus kunkeei	AZBY01000020.1||0_partial	AZBY01000020.1||0_partial__00007	0			-	-	-
Lactobacillus kunkeei	AZBY01000020.1||0_partial	AZBY01000020.1||0_partial__00001	EG	arCOG00271	COG0697 Permeases of the drug metabolite transporter (DMT) superfamily	-	-	-
Lactobacillus kunkeei	AZBY01000020.1||0_partial	AZBY01000020.1||0_partial__00002	Ph	-	-	phrog_1	integrase	-
Lactobacillus kunkeei	AZBY01000020.1||0_partial	AZBY01000020.1||0_partial__00008	S	4QB0K	Protein of unknown function (DUF739)	-	-	-
Lactobacillus kunkeei	AZBY01000020.1||0_partial	AZBY01000020.1||0_partial__00004	S	30C8A	unknown	-	-	-
Lactobacillus kunkeei	AZBY01000020.1||0_partial	AZBY01000020.1||0_partial__00010	Ph	-	-	phrog_186	DnaD-like helicase loader	-
Lactobacillus kunkeei	AZBY01000020.1||0_partial	AZBY01000020.1||0_partial__00015	0			-	-	-
Lactobacillus kunkeei	AZBY01000020.1||0_partial	AZBY01000020.1||0_partial__00009	0			-	-	-
Lactobacillus kunkeei	AZBY01000020.1||0_partial	AZBY01000020.1||0_partial__00005	S	32NA3	unknown	-	-	-
Lactobacillus kunkeei	AZBY01000020.1||0_partial	AZBY01000020.1||0_partial__00014	S	33B6R	unknown	-	-	-
Paenibacillus larvae	CH981373.1||full_1	CH981373.1||full_1__00070	Ph	-	-	phrog_3088	amidase	-
Paenibacillus larvae	CH981373.1||full_1	CH981373.1||full_1__00063	Ph	-	-	phrog_58	tail length tape measure protein	-
Paenibacillus larvae	CH981373.1||full_1	CH981373.1||full_1__00069	Ph	-	-	phrog_199	holin	-
Paenibacillus larvae	CH981373.1||full_1	CH981373.1||full_1__00059	Ph	-	-	phrog_176	tail terminator	-
Paenibacillus larvae	CH981373.1||full_1	CH981373.1||full_1__00065	Ph	-	-	phrog_3558	tail protein	-
Paenibacillus larvae	CH981373.1||full_1	CH981373.1||full_1__00013	S	4QEAN		-	-	-
Paenibacillus larvae	CH981373.1||full_1	CH981373.1||full_1__00064	Ph	-	-	phrog_33	distal tail protein Dit	-
Paenibacillus larvae	CH981373.1||full_1	CH981373.1||full_1__00058	S	32YF3	unknown	-	-	-
Paenibacillus larvae	CH981373.1||full_1	CH981373.1||full_1__00066	Ph	-	-	phrog_5339	virion structural protein	-
Paenibacillus larvae	CH981373.1||full_1	CH981373.1||full_1__00014	S	33J4E	unknown	-	-	-
Paenibacillus larvae	CH981373.1||full_1	CH981373.1||full_1__00053	Ph	-	-	phrog_115	minor head protein	-
Paenibacillus larvae	CH981373.1||full_1	CH981373.1||full_1__00030	S	306F8	unknown	-	-	-
Paenibacillus larvae	CH981373.1||full_1	CH981373.1||full_1__00050	Ph	-	-	phrog_509	terminase small subunit	-
Paenibacillus larvae	CH981373.1||full_1	CH981373.1||full_1__00046	S	33BWX	unknown	-	-	-
Paenibacillus larvae	CH981373.1||full_1	CH981373.1||full_1__00049	0			-	-	-
Paenibacillus larvae	CH981373.1||full_1	CH981373.1||full_1__00057	S	2ZX3I	unknown	-	-	-
Paenibacillus larvae	CH981373.1||full_1	CH981373.1||full_1__00047	0			-	-	-
Paenibacillus larvae	CH981373.1||full_1	CH981373.1||full_1__00052	Ph	-	-	phrog_64	portal protein	-
Paenibacillus larvae	CH981373.1||full_1	CH981373.1||full_1__00042	S	30AXH	unknown	-	-	-
Paenibacillus larvae	CH981373.1||full_1	CH981373.1||full_1__00016	0			-	-	-
Paenibacillus larvae	CH981373.1||full_1	CH981373.1||full_1__00037	S	4QDCH		-	-	-
Paenibacillus larvae	CH981373.1||full_1	CH981373.1||full_1__00045	Ph	-	-	phrog_36	transcriptional regulator	-
Paenibacillus larvae	CH981373.1||full_1	CH981373.1||full_1__00086	Ph	-	-	phrog_1	integrase	-
Paenibacillus larvae	CH981373.1||full_1	CH981373.1||full_1__00067	S	4QCNP		-	-	-
Paenibacillus larvae	CH981373.1||full_1	CH981373.1||full_1__00011	0			-	-	-
Paenibacillus larvae	CH981373.1||full_1	CH981373.1||full_1__00079	G	KOG2653	D-gluconate metabolic process	-	-	Potential AMG
Paenibacillus larvae	CH981373.1||full_1	CH981373.1||full_1__00062	S	32XJQ	unknown	-	-	-
Paenibacillus larvae	CH981373.1||full_1	CH981373.1||full_1__00076	S	2SQ9V	Bacillus/Clostridium GerA spore germination protein	-	-	-
Paenibacillus larvae	CH981373.1||full_1	CH981373.1||full_1__00061	Ph	-	-	phrog_2115	tail protein	-
Paenibacillus larvae	CH981373.1||full_1	CH981373.1||full_1__00088	Ph	-	-	phrog_1468	transcriptional repressor	-
Paenibacillus larvae	CH981373.1||full_1	CH981373.1||full_1__00072	Ph	-	-	phrog_1299	holin	-
Paenibacillus larvae	CH981373.1||full_1	CH981373.1||full_1__00075	S	30J7K	Helix-turn-helix domain	-	-	-
Paenibacillus larvae	CH981373.1||full_1	CH981373.1||full_1__00010	0			-	-	-
Paenibacillus larvae	CH981373.1||full_1	CH981373.1||full_1__00081	0			-	-	-
Paenibacillus larvae	CH981373.1||full_1	CH981373.1||full_1__00039	Ph	-	-	phrog_2597	DNA primase	-
Paenibacillus larvae	CH981373.1||full_1	CH981373.1||full_1__00054	Ph	-	-	phrog_172	head scaffolding protein	-
Paenibacillus larvae	CH981373.1||full_1	CH981373.1||full_1__00060	Ph	-	-	phrog_1407	major tail protein	-
Paenibacillus larvae	CH981373.1||full_1	CH981373.1||full_1__00023	S	4QAIJ	C-5 cytosine-specific DNA methylase	-	-	-
Paenibacillus larvae	CH981373.1||full_1	CH981373.1||full_1__00084	Ph	-	-	phrog_293	ABC transporter	Unspecified Moron
Paenibacillus larvae	CH981373.1||full_1	CH981373.1||full_1__00040	0			-	-	-
Paenibacillus larvae	CH981373.1||full_1	CH981373.1||full_1__00036	Ph	-	-	phrog_124	Sak4-like ssDNA annealing protein	-
Paenibacillus larvae	CH981373.1||full_1	CH981373.1||full_1__00012	S	4QC3C		-	-	-
Paenibacillus larvae	CH981373.1||full_1	CH981373.1||full_1__00083	0			-	-	-
Paenibacillus larvae	CH981373.1||full_1	CH981373.1||full_1__00019	0			-	-	-
Paenibacillus larvae	CH981373.1||full_1	CH981373.1||full_1__00043	Ph	-	-	phrog_351	RNA polymerase sigma factor	-
Paenibacillus larvae	CH981373.1||full_1	CH981373.1||full_1__00032	Ph	-	-	phrog_4681	antitoxin from a toxin-antitoxin system	Unspecified Moron
Paenibacillus larvae	CH981373.1||full_1	CH981373.1||full_1__00085	U	COG4473	ABC transporter	-	-	-
Paenibacillus larvae	CH981373.1||full_1	CH981373.1||full_1__00078	M	arCOG01391	PFAM Glycosyl transferase family 2	-	-	-
Paenibacillus larvae	CH981373.1||full_1	CH981373.1||full_1__00020	0			-	-	-
Paenibacillus larvae	CH981373.1||full_1	CH981373.1||full_1__00092	0			-	-	-
Paenibacillus larvae	CH981373.1||full_1	CH981373.1||full_1__00001	Ph	-	-	phrog_1	integrase	-
Paenibacillus larvae	CH981373.1||full_1	CH981373.1||full_1__00009	S	4QEX6		-	-	-
Paenibacillus larvae	CH981373.1||full_1	CH981373.1||full_1__00077	E	2SUPZ	Thermolysin metallopeptidase, alpha-helical domain	-	-	Potential AMG
Paenibacillus larvae	CH981373.1||full_1	CH981373.1||full_1__00008	S	34AHR	Helix-turn-helix domain	-	-	-
Paenibacillus larvae	CH981373.1||full_1	CH981373.1||full_1__00026	Ph	-	-	phrog_4681	antitoxin from a toxin-antitoxin system	Unspecified Moron
Paenibacillus larvae	CH981373.1||full_1	CH981373.1||full_1__00034	S	2ZCCB	unknown	-	-	-
Paenibacillus larvae	CH981373.1||full_1	CH981373.1||full_1__00004	Ph	-	-	phrog_8	transcriptional regulator	-
Paenibacillus larvae	CH981373.1||full_1	CH981373.1||full_1__00033	Ph	-	-	phrog_997	replication terminator	-
Paenibacillus larvae	CH981373.1||full_1	CH981373.1||full_1__00031	0			-	-	-
Paenibacillus larvae	CH981373.1||full_1	CH981373.1||full_1__00027	Ph	-	-	phrog_997	replication terminator	-
Paenibacillus larvae	CH981373.1||full_1	CH981373.1||full_1__00090	S	33M1V	unknown	-	-	-
Paenibacillus larvae	CH981373.1||full_1	CH981373.1||full_1__00074	Ph	-	-	phrog_157	transposase	-
Paenibacillus larvae	CH981373.1||full_1	CH981373.1||full_1__00068	S	4QEHA		-	-	-
Paenibacillus larvae	CH981373.1||full_1	CH981373.1||full_1__00006	S	348UT	unknown	-	-	-
Paenibacillus larvae	CH981373.1||full_1	CH981373.1||full_1__00048	S	33670	unknown	-	-	-
Paenibacillus larvae	CH981373.1||full_1	CH981373.1||full_1__00029	0			-	-	-
Paenibacillus larvae	CH981373.1||full_1	CH981373.1||full_1__00044	S	30BXN	unknown	-	-	-
Paenibacillus larvae	CH981373.1||full_1	CH981373.1||full_1__00051	Ph	-	-	phrog_10250	terminase large subunit	-
Paenibacillus larvae	CH981373.1||full_1	CH981373.1||full_1__00025	0			-	-	-
Paenibacillus larvae	CH981373.1||full_1	CH981373.1||full_1__00035	S	4QEW8		-	-	-
Paenibacillus larvae	CH981373.1||full_1	CH981373.1||full_1__00041	Ph	-	-	phrog_140	RusA-like Holliday junction resolvase	-
Paenibacillus larvae	CH981373.1||full_1	CH981373.1||full_1__00056	Ph	-	-	phrog_132	head-tail adaptor	-
Paenibacillus larvae	CH981373.1||full_1	CH981373.1||full_1__00024	0			-	-	-
Paenibacillus larvae	CH981373.1||full_1	CH981373.1||full_1__00055	Ph	-	-	phrog_544	major head protein	-
Paenibacillus larvae	CH981373.1||full_1	CH981373.1||full_1__00002	S	4QCCB	Pfam:Peptidase_M78	-	-	-
Paenibacillus larvae	CH981373.1||full_1	CH981373.1||full_1__00007	Ph	-	-	phrog_373	anti-repressor	-
Paenibacillus larvae	CH981373.1||full_1	CH981373.1||full_1__00022	0			-	-	-
Paenibacillus larvae	CH981373.1||full_1	CH981373.1||full_1__00003	Ph	-	-	phrog_8	transcriptional regulator	-
Paenibacillus larvae	CH981373.1||full_1	CH981373.1||full_1__00021	0			-	-	-
Paenibacillus larvae	CH981373.1||full_1	CH981373.1||full_1__00028	S	33M1V	unknown	-	-	-
Paenibacillus larvae	CH981373.1||full_1	CH981373.1||full_1__00082	S	2Z8P5	Lantibiotic dehydratase, C terminus	-	-	-
Paenibacillus larvae	CH981373.1||full_1	CH981373.1||full_1__00089	Ph	-	-	phrog_63	anti-repressor Ant	-
Paenibacillus larvae	CH981373.1||full_1	CH981373.1||full_1__00073	Ph	-	-	phrog_151	transposase	-
Paenibacillus larvae	CH981373.1||full_1	CH981373.1||full_1__00017	0			-	-	-
Paenibacillus larvae	CH981373.1||full_1	CH981373.1||full_1__00018	0			-	-	-
Paenibacillus larvae	CH981373.1||full_1	CH981373.1||full_1__00071	S	32SVK	unknown	-	-	-
Paenibacillus larvae	CH981373.1||full_1	CH981373.1||full_1__00087	Ph	-	-	phrog_18248	transcriptional regulator	-
Paenibacillus larvae	CH981373.1||full_1	CH981373.1||full_1__00038	Ph	-	-	phrog_16	DNA helicase	-
Paenibacillus larvae	CH981373.1||full_1	CH981373.1||full_1__00005	0			-	-	-
Paenibacillus larvae	CH981373.1||full_1	CH981373.1||full_1__00091	Ph	-	-	phrog_373	anti-repressor	-
Paenibacillus larvae	CH981373.1||full_1	CH981373.1||full_1__00015	0			-	-	-
Paenibacillus larvae	CH981373.1||full_1	CH981373.1||full_1__00093	0			-	-	-
Paenibacillus larvae	CH981373.1||full_1	CH981373.1||full_1__00094	0			-	-	-
Paenibacillus larvae	CH981373.1||full_1	CH981373.1||full_1__00080	S	33MFV	unknown	-	-	-
Paenibacillus larvae	CH981374.1||full_1	CH981374.1||full_1__00001	0			-	-	-
Paenibacillus larvae	CH981374.1||full_1	CH981374.1||full_1__00010	Ph	-	-	phrog_37443	toxin	Unspecified Moron
Paenibacillus larvae	CH981374.1||full_1	CH981374.1||full_1__00005	KOT	COG4512	PFAM Accessory gene regulator B	-	-	-
Paenibacillus larvae	CH981374.1||full_1	CH981374.1||full_1__00002	0			-	-	-
Paenibacillus larvae	CH981374.1||full_1	CH981374.1||full_1__00009	0			-	-	-
Paenibacillus larvae	CH981374.1||full_1	CH981374.1||full_1__00013	S	33R24	unknown	-	-	-
Paenibacillus larvae	CH981374.1||full_1	CH981374.1||full_1__00011	0			-	-	-
Paenibacillus larvae	CH981374.1||full_1	CH981374.1||full_1__00006	Ph	-	-	phrog_15604	membrane protein	Unspecified Moron
Paenibacillus larvae	CH981374.1||full_1	CH981374.1||full_1__00022	Ph	-	-	phrog_33	distal tail protein Dit	-
Paenibacillus larvae	CH981374.1||full_1	CH981374.1||full_1__00007	S	4QBTR	Domain of unknown function (DUF4352)	-	-	-
Paenibacillus larvae	CH981374.1||full_1	CH981374.1||full_1__00019	S	4QCNP		-	-	-
Paenibacillus larvae	CH981374.1||full_1	CH981374.1||full_1__00015	S	4QCCA		-	-	-
Paenibacillus larvae	CH981374.1||full_1	CH981374.1||full_1__00020	Ph	-	-	phrog_5339	virion structural protein	-
Paenibacillus larvae	CH981374.1||full_1	CH981374.1||full_1__00003	S	3072E	unknown	-	-	-
Paenibacillus larvae	CH981374.1||full_1	CH981374.1||full_1__00017	Ph	-	-	phrog_2429	involved in bacteriocin production or immunity	Unspecified Moron
Paenibacillus larvae	CH981374.1||full_1	CH981374.1||full_1__00021	Ph	-	-	phrog_538	minor tail protein	-
Paenibacillus larvae	CH981374.1||full_1	CH981374.1||full_1__00004	0			-	-	-
Paenibacillus larvae	CH981374.1||full_1	CH981374.1||full_1__00018	S	4QEHA		-	-	-
Paenibacillus larvae	CH981374.1||full_1	CH981374.1||full_1__00023	Ph	-	-	phrog_5493	tail length tape measure protein	-
Paenibacillus larvae	CH981374.1||full_1	CH981374.1||full_1__00008	S	3067S	Cro/C1-type HTH DNA-binding domain	-	-	-
Paenibacillus larvae	CH981374.1||full_1	CH981374.1||full_1__00016	Ph	-	-	phrog_3088	amidase	-
Paenibacillus larvae	CH981374.1||full_1	CH981374.1||full_1__00014	Ph	-	-	phrog_1299	holin	-
Paenibacillus larvae	CH981374.1||full_1	CH981374.1||full_1__00012	S	30E2J	unknown	-	-	-
Paenibacillus larvae	CH981386.1||full_1	CH981386.1||full_1__00008	S	349N1	unknown	-	-	-
Paenibacillus larvae	CH981386.1||full_1	CH981386.1||full_1__00024	0			-	-	-
Paenibacillus larvae	CH981386.1||full_1	CH981386.1||full_1__00002	0			-	-	-
Paenibacillus larvae	CH981386.1||full_1	CH981386.1||full_1__00009	0			-	-	-
Paenibacillus larvae	CH981386.1||full_1	CH981386.1||full_1__00006	S	34A9H	unknown	-	-	-
Paenibacillus larvae	CH981386.1||full_1	CH981386.1||full_1__00022	0			-	-	-
Paenibacillus larvae	CH981386.1||full_1	CH981386.1||full_1__00026	0			-	-	-
Paenibacillus larvae	CH981386.1||full_1	CH981386.1||full_1__00005	0			-	-	-
Paenibacillus larvae	CH981386.1||full_1	CH981386.1||full_1__00010	0			-	-	-
Paenibacillus larvae	CH981386.1||full_1	CH981386.1||full_1__00016	Ph	-	-	phrog_7370	HNH endonuclease	-
Paenibacillus larvae	CH981386.1||full_1	CH981386.1||full_1__00012	Ph	-	-	phrog_3356	transposase	-
Paenibacillus larvae	CH981386.1||full_1	CH981386.1||full_1__00036	Ph	-	-	phrog_63	anti-repressor Ant	-
Paenibacillus larvae	CH981386.1||full_1	CH981386.1||full_1__00038	Ph	-	-	phrog_1	integrase	-
Paenibacillus larvae	CH981386.1||full_1	CH981386.1||full_1__00007	L	2SGCR	DNA methylase	-	-	-
Paenibacillus larvae	CH981386.1||full_1	CH981386.1||full_1__00033	0			-	-	-
Paenibacillus larvae	CH981386.1||full_1	CH981386.1||full_1__00039	S	COG0658	competence protein	-	-	-
Paenibacillus larvae	CH981386.1||full_1	CH981386.1||full_1__00034	0			-	-	-
Paenibacillus larvae	CH981386.1||full_1	CH981386.1||full_1__00017	Ph	-	-	phrog_1227	exonuclease	-
Paenibacillus larvae	CH981386.1||full_1	CH981386.1||full_1__00014	Ph	-	-	phrog_50	DnaC-like helicase loader	-
Paenibacillus larvae	CH981386.1||full_1	CH981386.1||full_1__00037	Ph	-	-	phrog_8	transcriptional regulator	-
Paenibacillus larvae	CH981386.1||full_1	CH981386.1||full_1__00032	S	4QC3C		-	-	-
Paenibacillus larvae	CH981386.1||full_1	CH981386.1||full_1__00018	S	2ZA3S	unknown	-	-	-
Paenibacillus larvae	CH981386.1||full_1	CH981386.1||full_1__00028	Ph	-	-	phrog_130	anti-repressor Ant	-
Paenibacillus larvae	CH981386.1||full_1	CH981386.1||full_1__00019	S	4QEW8		-	-	-
Paenibacillus larvae	CH981386.1||full_1	CH981386.1||full_1__00023	0			-	-	-
Paenibacillus larvae	CH981386.1||full_1	CH981386.1||full_1__00029	0			-	-	-
Paenibacillus larvae	CH981386.1||full_1	CH981386.1||full_1__00031	0			-	-	-
Paenibacillus larvae	CH981386.1||full_1	CH981386.1||full_1__00003	S	33BWX	unknown	-	-	-
Paenibacillus larvae	CH981386.1||full_1	CH981386.1||full_1__00027	0			-	-	-
Paenibacillus larvae	CH981386.1||full_1	CH981386.1||full_1__00011	Ph	-	-	phrog_34	RusA-like Holliday junction resolvase	-
Paenibacillus larvae	CH981386.1||full_1	CH981386.1||full_1__00013	0			-	-	-
Paenibacillus larvae	CH981386.1||full_1	CH981386.1||full_1__00021	S	30R40	unknown	-	-	-
Paenibacillus larvae	CH981386.1||full_1	CH981386.1||full_1__00015	Ph	-	-	phrog_9474	replication initiation protein	-
Paenibacillus larvae	CH981386.1||full_1	CH981386.1||full_1__00030	Ph	-	-	phrog_4681	antitoxin from a toxin-antitoxin system	Unspecified Moron
Paenibacillus larvae	CH981386.1||full_1	CH981386.1||full_1__00025	Ph	-	-	phrog_1760	anti-repressor	-
Paenibacillus larvae	CH981386.1||full_1	CH981386.1||full_1__00020	S	313RY	Protein of unknown function (DUF1256)	-	-	-
Paenibacillus larvae	CH981386.1||full_1	CH981386.1||full_1__00004	Ph	-	-	phrog_1190	RNA polymerase sigma factor	-
Paenibacillus larvae	CH981386.1||full_1	CH981386.1||full_1__00035	0			-	-	-
Paenibacillus larvae	CH981386.1||full_1	CH981386.1||full_1__00001	0			-	-	-
Paenibacillus larvae	CH981396.1||full	CH981396.1||full__00021	S	4QGFE		-	-	-
Paenibacillus larvae	CH981396.1||full	CH981396.1||full__00009	S	4QAXV	YopX protein	-	-	-
Paenibacillus larvae	CH981396.1||full	CH981396.1||full__00026	S	4QAWG	DnaB-like helicase C terminal domain	-	-	-
Paenibacillus larvae	CH981396.1||full	CH981396.1||full__00005	Ph	-	-	phrog_19	DnaB-like replicative helicase	-
Paenibacillus larvae	CH981396.1||full	CH981396.1||full__00002	S	4QD9Q		-	-	-
Paenibacillus larvae	CH981396.1||full	CH981396.1||full__00033	0			-	-	-
Paenibacillus larvae	CH981396.1||full	CH981396.1||full__00015	S	4QDAG		-	-	-
Paenibacillus larvae	CH981396.1||full	CH981396.1||full__00027	S	4QGFE		-	-	-
Paenibacillus larvae	CH981396.1||full	CH981396.1||full__00014	Ph	-	-	phrog_159	RuvC-like Holliday junction resolvase	-
Paenibacillus larvae	CH981396.1||full	CH981396.1||full__00003	Ph	-	-	phrog_2780	RecT-like ssDNA annealing protein	-
Paenibacillus larvae	CH981396.1||full	CH981396.1||full__00035	0			-	-	-
Paenibacillus larvae	CH981396.1||full	CH981396.1||full__00010	Ph	-	-	phrog_8	transcriptional regulator	-
Paenibacillus larvae	CH981396.1||full	CH981396.1||full__00017	Ph	-	-	phrog_497	toxin-antitoxin system HicB-like	Unspecified Moron
Paenibacillus larvae	CH981396.1||full	CH981396.1||full__00020	Ph	-	-	phrog_19	DnaB-like replicative helicase	-
Paenibacillus larvae	CH981396.1||full	CH981396.1||full__00029	0			-	-	-
Paenibacillus larvae	CH981396.1||full	CH981396.1||full__00024	S	4QBPM		-	-	-
Paenibacillus larvae	CH981396.1||full	CH981396.1||full__00004	Ph	-	-	phrog_2514	DnaD-like helicase loader	-
Paenibacillus larvae	CH981396.1||full	CH981396.1||full__00008	0			-	-	-
Paenibacillus larvae	CH981396.1||full	CH981396.1||full__00028	0			-	-	-
Paenibacillus larvae	CH981396.1||full	CH981396.1||full__00001	S	4QG2D		-	-	-
Paenibacillus larvae	CH981396.1||full	CH981396.1||full__00036	S	4QBPM		-	-	-
Paenibacillus larvae	CH981396.1||full	CH981396.1||full__00023	0			-	-	-
Paenibacillus larvae	CH981396.1||full	CH981396.1||full__00031	0			-	-	-
Paenibacillus larvae	CH981396.1||full	CH981396.1||full__00034	0			-	-	-
Paenibacillus larvae	CH981396.1||full	CH981396.1||full__00016	Ph	-	-	phrog_248	transcriptional activator	-
Paenibacillus larvae	CH981396.1||full	CH981396.1||full__00025	Ph	-	-	phrog_159	RuvC-like Holliday junction resolvase	-
Paenibacillus larvae	CH981396.1||full	CH981396.1||full__00007	0			-	-	-
Paenibacillus larvae	CH981396.1||full	CH981396.1||full__00019	Ph	-	-	phrog_2514	DnaD-like helicase loader	-
Paenibacillus larvae	CH981396.1||full	CH981396.1||full__00022	S	4QAIJ	C-5 cytosine-specific DNA methylase	-	-	-
Paenibacillus larvae	CH981396.1||full	CH981396.1||full__00012	0			-	-	-
Paenibacillus larvae	CH981396.1||full	CH981396.1||full__00030	S	4QAXV	YopX protein	-	-	-
Paenibacillus larvae	CH981396.1||full	CH981396.1||full__00032	S	33EXP	unknown	-	-	-
Paenibacillus larvae	CH981396.1||full	CH981396.1||full__00013	S	4QBPM		-	-	-
Paenibacillus larvae	CH981396.1||full	CH981396.1||full__00006	S	4QGFE		-	-	-
Paenibacillus larvae	CH981396.1||full	CH981396.1||full__00037	Ph	-	-	phrog_159	RuvC-like Holliday junction resolvase	-
Paenibacillus larvae	CH981396.1||full	CH981396.1||full__00018	Ph	-	-	phrog_353	toxin	Unspecified Moron
Paenibacillus larvae	CH981396.1||full	CH981396.1||full__00011	0			-	-	-
Paenibacillus larvae	CH981397.1||full	CH981397.1||full__00013	0			-	-	-
Paenibacillus larvae	CH981397.1||full	CH981397.1||full__00012	Ph	-	-	phrog_135	dUTPase	-
Paenibacillus larvae	CH981397.1||full	CH981397.1||full__00002	S	2ZHNQ	unknown	-	-	-
Paenibacillus larvae	CH981397.1||full	CH981397.1||full__00014	0			-	-	-
Paenibacillus larvae	CH981397.1||full	CH981397.1||full__00009	Ph	-	-	phrog_1706	CRISPR/Cas system associated	-
Paenibacillus larvae	CH981397.1||full	CH981397.1||full__00006	Ph	-	-	phrog_10285	DNA polymerase	-
Paenibacillus larvae	CH981397.1||full	CH981397.1||full__00011	0			-	-	-
Paenibacillus larvae	CH981397.1||full	CH981397.1||full__00004	Ph	-	-	phrog_12241	DNA polymerase	-
Paenibacillus larvae	CH981397.1||full	CH981397.1||full__00007	0			-	-	-
Paenibacillus larvae	CH981397.1||full	CH981397.1||full__00008	Ph	-	-	phrog_192	DNA polymerase exonuclease subunit	-
Paenibacillus larvae	CH981397.1||full	CH981397.1||full__00010	Ph	-	-	phrog_159	RuvC-like Holliday junction resolvase	-
Paenibacillus larvae	CH981397.1||full	CH981397.1||full__00001	0			-	-	-
Paenibacillus larvae	CH981397.1||full	CH981397.1||full__00005	0			-	-	-
Paenibacillus larvae	CH981397.1||full	CH981397.1||full__00003	Ph	-	-	phrog_12241	DNA polymerase	-
Paenibacillus larvae	CH981398.1||0_partial_1	CH981398.1||0_partial_1__00002	S	32423	unknown	-	-	-
Paenibacillus larvae	CH981398.1||0_partial_1	CH981398.1||0_partial_1__00010	S	327FB	CENP-B N-terminal DNA-binding domain	-	-	-
Paenibacillus larvae	CH981398.1||0_partial_1	CH981398.1||0_partial_1__00011	Ph	-	-	phrog_157	transposase	-
Paenibacillus larvae	CH981398.1||0_partial_1	CH981398.1||0_partial_1__00015	Ph	-	-	phrog_18811	toxin	Unspecified Moron
Paenibacillus larvae	CH981398.1||0_partial_1	CH981398.1||0_partial_1__00004	0			-	-	-
Paenibacillus larvae	CH981398.1||0_partial_1	CH981398.1||0_partial_1__00013	0			-	-	-
Paenibacillus larvae	CH981398.1||0_partial_1	CH981398.1||0_partial_1__00018	0			-	-	-
Paenibacillus larvae	CH981398.1||0_partial_1	CH981398.1||0_partial_1__00020	0			-	-	-
Paenibacillus larvae	CH981398.1||0_partial_1	CH981398.1||0_partial_1__00006	0			-	-	-
Paenibacillus larvae	CH981398.1||0_partial_1	CH981398.1||0_partial_1__00007	Ph	-	-	phrog_1220	head protein	-
Paenibacillus larvae	CH981398.1||0_partial_1	CH981398.1||0_partial_1__00008	Ph	-	-	phrog_3088	amidase	-
Paenibacillus larvae	CH981398.1||0_partial_1	CH981398.1||0_partial_1__00009	Ph	-	-	phrog_1299	holin	-
Paenibacillus larvae	CH981398.1||0_partial_1	CH981398.1||0_partial_1__00001	Ph	-	-		NA	-
Paenibacillus larvae	CH981398.1||0_partial_1	CH981398.1||0_partial_1__00012	S	301EI	STAS-like domain of unknown function (DUF4325)	-	-	-
Paenibacillus larvae	CH981398.1||0_partial_1	CH981398.1||0_partial_1__00019	0			-	-	-
Paenibacillus larvae	CH981398.1||0_partial_1	CH981398.1||0_partial_1__00003	S	33VJF	unknown	-	-	-
Paenibacillus larvae	CH981398.1||0_partial_1	CH981398.1||0_partial_1__00014	Ph	-	-	phrog_18811	toxin	Unspecified Moron
Paenibacillus larvae	CH981398.1||0_partial_1	CH981398.1||0_partial_1__00005	0			-	-	-
Paenibacillus larvae	CH981398.1||0_partial_1	CH981398.1||0_partial_1__00017	Ph	-	-	phrog_151	transposase	-
Paenibacillus larvae	CH981398.1||0_partial_1	CH981398.1||0_partial_1__00016	S	32UIX	unknown	-	-	-
Paenibacillus larvae	CH981398.1||0_partial_1	CH981398.1||0_partial_1__00021	S	33XAK	unknown	-	-	-
Paenibacillus larvae	CH981405.1||full_1	CH981405.1||full_1__00011	S	4QG2D		-	-	-
Paenibacillus larvae	CH981405.1||full_1	CH981405.1||full_1__00004	0			-	-	-
Paenibacillus larvae	CH981405.1||full_1	CH981405.1||full_1__00008	S	4QDB9		-	-	-
Paenibacillus larvae	CH981405.1||full_1	CH981405.1||full_1__00001	Ph	-	-	phrog_95	integrase	-
Paenibacillus larvae	CH981405.1||full_1	CH981405.1||full_1__00010	S	4QEAN		-	-	-
Paenibacillus larvae	CH981405.1||full_1	CH981405.1||full_1__00009	S	4QC3C		-	-	-
Paenibacillus larvae	CH981405.1||full_1	CH981405.1||full_1__00006	0			-	-	-
Paenibacillus larvae	CH981405.1||full_1	CH981405.1||full_1__00007	0			-	-	-
Paenibacillus larvae	CH981405.1||full_1	CH981405.1||full_1__00012	S	4QD9Q		-	-	-
Paenibacillus larvae	CH981405.1||full_1	CH981405.1||full_1__00003	K	COG3800	Transcriptional regulator	-	-	-
Paenibacillus larvae	CH981405.1||full_1	CH981405.1||full_1__00002	Ph	-	-	phrog_8	transcriptional regulator	-
Paenibacillus larvae	CH981405.1||full_1	CH981405.1||full_1__00005	Ph	-	-	phrog_373	anti-repressor	-
Paenibacillus larvae	CH981409.1||full	CH981409.1||full__00022	Ph	-	-	phrog_5339	virion structural protein	-
Paenibacillus larvae	CH981409.1||full	CH981409.1||full__00015	0			-	-	-
Paenibacillus larvae	CH981409.1||full	CH981409.1||full__00013	0			-	-	-
Paenibacillus larvae	CH981409.1||full	CH981409.1||full__00007	0			-	-	-
Paenibacillus larvae	CH981409.1||full	CH981409.1||full__00008	0			-	-	-
Paenibacillus larvae	CH981409.1||full	CH981409.1||full__00021	S	4QCNP		-	-	-
Paenibacillus larvae	CH981409.1||full	CH981409.1||full__00020	S	4QEHA		-	-	-
Paenibacillus larvae	CH981409.1||full	CH981409.1||full__00016	0			-	-	-
Paenibacillus larvae	CH981409.1||full	CH981409.1||full__00014	0			-	-	-
Paenibacillus larvae	CH981409.1||full	CH981409.1||full__00005	K	334GS	Transcriptional regulator	-	-	-
Paenibacillus larvae	CH981409.1||full	CH981409.1||full__00003	Ph	-	-	phrog_1271	HNH endonuclease	-
Paenibacillus larvae	CH981409.1||full	CH981409.1||full__00012	0			-	-	-
Paenibacillus larvae	CH981409.1||full	CH981409.1||full__00001	0			-	-	-
Paenibacillus larvae	CH981409.1||full	CH981409.1||full__00002	S	33IDB	unknown	-	-	-
Paenibacillus larvae	CH981409.1||full	CH981409.1||full__00019	Ph	-	-	phrog_2429	involved in bacteriocin production or immunity	Unspecified Moron
Paenibacillus larvae	CH981409.1||full	CH981409.1||full__00024	Ph	-	-	phrog_33	distal tail protein Dit	-
Paenibacillus larvae	CH981409.1||full	CH981409.1||full__00023	Ph	-	-	phrog_538	minor tail protein	-
Paenibacillus larvae	CH981409.1||full	CH981409.1||full__00004	0			-	-	-
Paenibacillus larvae	CH981409.1||full	CH981409.1||full__00010	S	33CP1	unknown	-	-	-
Paenibacillus larvae	CH981409.1||full	CH981409.1||full__00009	S	2ZMR5	unknown	-	-	-
Paenibacillus larvae	CH981409.1||full	CH981409.1||full__00018	Ph	-	-	phrog_3088	amidase	-
Paenibacillus larvae	CH981409.1||full	CH981409.1||full__00011	0			-	-	-
Paenibacillus larvae	CH981409.1||full	CH981409.1||full__00006	0			-	-	-
Paenibacillus larvae	CH981409.1||full	CH981409.1||full__00025	Ph	-	-	phrog_58	tail length tape measure protein	-
Paenibacillus larvae	CH981409.1||full	CH981409.1||full__00017	Ph	-	-	phrog_1299	holin	-
Paenibacillus larvae	CH981423.1||full_1	CH981423.1||full_1__00002	Ph	-	-	phrog_4	transcriptional repressor	-
Paenibacillus larvae	CH981423.1||full_1	CH981423.1||full_1__00003	Ph	-	-	phrog_8	transcriptional regulator	-
Paenibacillus larvae	CH981423.1||full_1	CH981423.1||full_1__00010	0			-	-	-
Paenibacillus larvae	CH981423.1||full_1	CH981423.1||full_1__00008	0			-	-	-
Paenibacillus larvae	CH981423.1||full_1	CH981423.1||full_1__00006	S	348UT	unknown	-	-	-
Paenibacillus larvae	CH981423.1||full_1	CH981423.1||full_1__00004	0			-	-	-
Paenibacillus larvae	CH981423.1||full_1	CH981423.1||full_1__00009	0			-	-	-
Paenibacillus larvae	CH981423.1||full_1	CH981423.1||full_1__00001	Ph	-	-	phrog_95	integrase	-
Paenibacillus larvae	CH981423.1||full_1	CH981423.1||full_1__00007	Ph	-	-	phrog_373	anti-repressor	-
Paenibacillus larvae	CH981423.1||full_1	CH981423.1||full_1__00005	S	331QR	unknown	-	-	-
Paenibacillus larvae	CH981423.1||full_1	CH981423.1||full_1__00011	S	331M4	Hypothetical protein (DUF2513)	-	-	-
Paenibacillus larvae	CH981432.1||full	CH981432.1||full__00011	Ph	-	-	phrog_124	Sak4-like ssDNA annealing protein	-
Paenibacillus larvae	CH981432.1||full	CH981432.1||full__00002	Ph	-	-	phrog_63	anti-repressor Ant	-
Paenibacillus larvae	CH981432.1||full	CH981432.1||full__00017	S	4QEW8		-	-	-
Paenibacillus larvae	CH981432.1||full	CH981432.1||full__00007	0			-	-	-
Paenibacillus larvae	CH981432.1||full	CH981432.1||full__00014	Ph	-	-	phrog_16	DNA helicase	-
Paenibacillus larvae	CH981432.1||full	CH981432.1||full__00005	0			-	-	-
Paenibacillus larvae	CH981432.1||full	CH981432.1||full__00006	0			-	-	-
Paenibacillus larvae	CH981432.1||full	CH981432.1||full__00013	S	4QDCH		-	-	-
Paenibacillus larvae	CH981432.1||full	CH981432.1||full__00008	Ph	-	-	phrog_4681	antitoxin from a toxin-antitoxin system	Unspecified Moron
Paenibacillus larvae	CH981432.1||full	CH981432.1||full__00012	S	4QEX6		-	-	-
Paenibacillus larvae	CH981432.1||full	CH981432.1||full__00003	S	34AHR	Helix-turn-helix domain	-	-	-
Paenibacillus larvae	CH981432.1||full	CH981432.1||full__00016	Ph	-	-	phrog_2597	DNA primase	-
Paenibacillus larvae	CH981432.1||full	CH981432.1||full__00001	S	2ZPV7	unknown	-	-	-
Paenibacillus larvae	CH981432.1||full	CH981432.1||full__00004	S	4QC3C		-	-	-
Paenibacillus larvae	CH981432.1||full	CH981432.1||full__00010	S	2ZCCB	unknown	-	-	-
Paenibacillus larvae	CH981432.1||full	CH981432.1||full__00015	0			-	-	-
Paenibacillus larvae	CH981432.1||full	CH981432.1||full__00009	Ph	-	-	phrog_997	replication terminator	-
Paenibacillus larvae	CH981455.1||full	CH981455.1||full__00008	S	331B9	unknown	-	-	-
Paenibacillus larvae	CH981455.1||full	CH981455.1||full__00012	Ph	-	-	phrog_88	major tail protein	-
Paenibacillus larvae	CH981455.1||full	CH981455.1||full__00014	Ph	-	-	phrog_1533	tail length tape measure protein	-
Paenibacillus larvae	CH981455.1||full	CH981455.1||full__00004	Ph	-	-	phrog_9	terminase large subunit	-
Paenibacillus larvae	CH981455.1||full	CH981455.1||full__00002	Ph	-	-	phrog_119	HNH endonuclease	-
Paenibacillus larvae	CH981455.1||full	CH981455.1||full__00013	S	32J4N	unknown	-	-	-
Paenibacillus larvae	CH981455.1||full	CH981455.1||full__00001	S	33MWH	unknown	-	-	-
Paenibacillus larvae	CH981455.1||full	CH981455.1||full__00006	Ph	-	-	phrog_80	head maturation protease	-
Paenibacillus larvae	CH981455.1||full	CH981455.1||full__00009	Ph	-	-	phrog_1951	head-tail adaptor	-
Paenibacillus larvae	CH981455.1||full	CH981455.1||full__00011	Ph	-	-	phrog_78	tail terminator	-
Paenibacillus larvae	CH981455.1||full	CH981455.1||full__00015	Ph	-	-	phrog_33	distal tail protein Dit	-
Paenibacillus larvae	CH981455.1||full	CH981455.1||full__00003	Ph	-	-	phrog_361	terminase small subunit	-
Paenibacillus larvae	CH981455.1||full	CH981455.1||full__00007	Ph	-	-	phrog_10	major head protein	-
Paenibacillus larvae	CH981455.1||full	CH981455.1||full__00005	Ph	-	-	phrog_12	portal protein	-
Paenibacillus larvae	CH981455.1||full	CH981455.1||full__00016	Ph	-	-	phrog_538	minor tail protein	-
Paenibacillus larvae	CH981455.1||full	CH981455.1||full__00010	Ph	-	-	phrog_5	tail completion or Neck1 protein	-
Paenibacillus larvae	CH981467.1||full	CH981467.1||full__00023	0			-	-	-
Paenibacillus larvae	CH981467.1||full	CH981467.1||full__00008	Ph	-	-	phrog_1252	DNA polymerase	-
Paenibacillus larvae	CH981467.1||full	CH981467.1||full__00027	0			-	-	-
Paenibacillus larvae	CH981467.1||full	CH981467.1||full__00026	0			-	-	-
Paenibacillus larvae	CH981467.1||full	CH981467.1||full__00024	0			-	-	-
Paenibacillus larvae	CH981467.1||full	CH981467.1||full__00003	S	33BW7	Protein of unknwon function (DUF3310)	-	-	-
Paenibacillus larvae	CH981467.1||full	CH981467.1||full__00018	S	32RH5	unknown	-	-	-
Paenibacillus larvae	CH981467.1||full	CH981467.1||full__00001	S	33BWX	unknown	-	-	-
Paenibacillus larvae	CH981467.1||full	CH981467.1||full__00007	S	2Z8BH	DNA N-6-adenine-methyltransferase	-	-	-
Paenibacillus larvae	CH981467.1||full	CH981467.1||full__00022	0			-	-	-
Paenibacillus larvae	CH981467.1||full	CH981467.1||full__00037	0			-	-	-
Paenibacillus larvae	CH981467.1||full	CH981467.1||full__00031	S	33HHF	unknown	-	-	-
Paenibacillus larvae	CH981467.1||full	CH981467.1||full__00014	0			-	-	-
Paenibacillus larvae	CH981467.1||full	CH981467.1||full__00005	0			-	-	-
Paenibacillus larvae	CH981467.1||full	CH981467.1||full__00016	Ph	-	-	phrog_8097	exonuclease	-
Paenibacillus larvae	CH981467.1||full	CH981467.1||full__00021	Ph	-	-	phrog_4681	antitoxin from a toxin-antitoxin system	Unspecified Moron
Paenibacillus larvae	CH981467.1||full	CH981467.1||full__00032	0			-	-	-
Paenibacillus larvae	CH981467.1||full	CH981467.1||full__00020	Ph	-	-	phrog_62	DNA helicase	-
Paenibacillus larvae	CH981467.1||full	CH981467.1||full__00035	S	34AHR	Helix-turn-helix domain	-	-	-
Paenibacillus larvae	CH981467.1||full	CH981467.1||full__00029	0			-	-	-
Paenibacillus larvae	CH981467.1||full	CH981467.1||full__00038	K	33B2D	Helix-turn-helix XRE-family like proteins	-	-	-
Paenibacillus larvae	CH981467.1||full	CH981467.1||full__00004	S	33C23	unknown	-	-	-
Paenibacillus larvae	CH981467.1||full	CH981467.1||full__00010	S	4QAXV	YopX protein	-	-	-
Paenibacillus larvae	CH981467.1||full	CH981467.1||full__00006	0			-	-	-
Paenibacillus larvae	CH981467.1||full	CH981467.1||full__00013	S	34A9H	unknown	-	-	-
Paenibacillus larvae	CH981467.1||full	CH981467.1||full__00030	0			-	-	-
Paenibacillus larvae	CH981467.1||full	CH981467.1||full__00034	0			-	-	-
Paenibacillus larvae	CH981467.1||full	CH981467.1||full__00002	Ph	-	-	phrog_36	transcriptional regulator	-
Paenibacillus larvae	CH981467.1||full	CH981467.1||full__00012	0			-	-	-
Paenibacillus larvae	CH981467.1||full	CH981467.1||full__00017	Ph	-	-	phrog_93	endonuclease	-
Paenibacillus larvae	CH981467.1||full	CH981467.1||full__00025	S	4QAIJ	C-5 cytosine-specific DNA methylase	-	-	-
Paenibacillus larvae	CH981467.1||full	CH981467.1||full__00011	0			-	-	-
Paenibacillus larvae	CH981467.1||full	CH981467.1||full__00009	0			-	-	-
Paenibacillus larvae	CH981467.1||full	CH981467.1||full__00033	S	4QC3C		-	-	-
Paenibacillus larvae	CH981467.1||full	CH981467.1||full__00028	0			-	-	-
Paenibacillus larvae	CH981467.1||full	CH981467.1||full__00036	Ph	-	-	phrog_373	anti-repressor	-
Paenibacillus larvae	CH981467.1||full	CH981467.1||full__00015	Ph	-	-	phrog_7778	single strand DNA binding protein	-
Paenibacillus larvae	CH981467.1||full	CH981467.1||full__00019	S	4QFWZ	Pfam:DUF5406	-	-	-
Paenibacillus larvae	CH981474.1||full_1	CH981474.1||full_1__00005	Ph	-	-	phrog_497	toxin-antitoxin system HicB-like	Unspecified Moron
Paenibacillus larvae	CH981474.1||full_1	CH981474.1||full_1__00012	S	4QAIJ	C-5 cytosine-specific DNA methylase	-	-	-
Paenibacillus larvae	CH981474.1||full_1	CH981474.1||full_1__00025	S	4QE9S		-	-	-
Paenibacillus larvae	CH981474.1||full_1	CH981474.1||full_1__00004	Ph	-	-	phrog_353	toxin	Unspecified Moron
Paenibacillus larvae	CH981474.1||full_1	CH981474.1||full_1__00011	0			-	-	-
Paenibacillus larvae	CH981474.1||full_1	CH981474.1||full_1__00008	0			-	-	-
Paenibacillus larvae	CH981474.1||full_1	CH981474.1||full_1__00032	S	4QC3C		-	-	-
Paenibacillus larvae	CH981474.1||full_1	CH981474.1||full_1__00015	Ph	-	-	phrog_3356	transposase	-
Paenibacillus larvae	CH981474.1||full_1	CH981474.1||full_1__00024	0			-	-	-
Paenibacillus larvae	CH981474.1||full_1	CH981474.1||full_1__00007	Ph	-	-	phrog_248	transcriptional activator	-
Paenibacillus larvae	CH981474.1||full_1	CH981474.1||full_1__00021	Ph	-	-	phrog_44	single strand DNA binding protein	-
Paenibacillus larvae	CH981474.1||full_1	CH981474.1||full_1__00036	0			-	-	-
Paenibacillus larvae	CH981474.1||full_1	CH981474.1||full_1__00037	K	COG1813	peptidyl-tyrosine sulfation	-	-	-
Paenibacillus larvae	CH981474.1||full_1	CH981474.1||full_1__00028	0			-	-	-
Paenibacillus larvae	CH981474.1||full_1	CH981474.1||full_1__00017	Ph	-	-	phrog_50	DnaC-like helicase loader	-
Paenibacillus larvae	CH981474.1||full_1	CH981474.1||full_1__00018	Ph	-	-	phrog_186	DnaD-like helicase loader	-
Paenibacillus larvae	CH981474.1||full_1	CH981474.1||full_1__00014	Ph	-	-	phrog_34	RusA-like Holliday junction resolvase	-
Paenibacillus larvae	CH981474.1||full_1	CH981474.1||full_1__00022	Ph	-	-	phrog_155	Erf-like ssDNA annealing protein	-
Paenibacillus larvae	CH981474.1||full_1	CH981474.1||full_1__00019	Ph	-	-	phrog_7370	HNH endonuclease	-
Paenibacillus larvae	CH981474.1||full_1	CH981474.1||full_1__00031	S	4QEAN		-	-	-
Paenibacillus larvae	CH981474.1||full_1	CH981474.1||full_1__00029	0			-	-	-
Paenibacillus larvae	CH981474.1||full_1	CH981474.1||full_1__00001	Ph	-	-	phrog_144	HNH endonuclease	-
Paenibacillus larvae	CH981474.1||full_1	CH981474.1||full_1__00009	0			-	-	-
Paenibacillus larvae	CH981474.1||full_1	CH981474.1||full_1__00026	S	4QE9S		-	-	-
Paenibacillus larvae	CH981474.1||full_1	CH981474.1||full_1__00023	Ph	-	-	phrog_2205	Mu Gam-like end protection	-
Paenibacillus larvae	CH981474.1||full_1	CH981474.1||full_1__00002	S	33G8I	unknown	-	-	-
Paenibacillus larvae	CH981474.1||full_1	CH981474.1||full_1__00034	S	4QDB9		-	-	-
Paenibacillus larvae	CH981474.1||full_1	CH981474.1||full_1__00035	S	306F8	unknown	-	-	-
Paenibacillus larvae	CH981474.1||full_1	CH981474.1||full_1__00039	Ph	-	-	phrog_95	integrase	-
Paenibacillus larvae	CH981474.1||full_1	CH981474.1||full_1__00038	Ph	-	-	phrog_8	transcriptional regulator	-
Paenibacillus larvae	CH981474.1||full_1	CH981474.1||full_1__00006	S	COG5294	Protein conserved in bacteria	-	-	-
Paenibacillus larvae	CH981474.1||full_1	CH981474.1||full_1__00033	0			-	-	-
Paenibacillus larvae	CH981474.1||full_1	CH981474.1||full_1__00020	S	306HY	unknown	-	-	-
Paenibacillus larvae	CH981474.1||full_1	CH981474.1||full_1__00013	0			-	-	-
Paenibacillus larvae	CH981474.1||full_1	CH981474.1||full_1__00016	0			-	-	-
Paenibacillus larvae	CH981474.1||full_1	CH981474.1||full_1__00010	0			-	-	-
Paenibacillus larvae	CH981474.1||full_1	CH981474.1||full_1__00027	S	33HHF	unknown	-	-	-
Paenibacillus larvae	CH981474.1||full_1	CH981474.1||full_1__00003	0			-	-	-
Paenibacillus larvae	CH981474.1||full_1	CH981474.1||full_1__00030	Ph	-	-	phrog_130	anti-repressor Ant	-
Paenibacillus larvae	CH981502.1||full	CH981502.1||full__00015	0			-	-	-
Paenibacillus larvae	CH981502.1||full	CH981502.1||full__00011	S	2Z99R	unknown	-	-	-
Paenibacillus larvae	CH981502.1||full	CH981502.1||full__00020	Ph	-	-	phrog_353	toxin	Unspecified Moron
Paenibacillus larvae	CH981502.1||full	CH981502.1||full__00017	0			-	-	-
Paenibacillus larvae	CH981502.1||full	CH981502.1||full__00024	L	COG4646	helicase C-terminal domain protein	-	-	-
Paenibacillus larvae	CH981502.1||full	CH981502.1||full__00010	Ph	-	-	phrog_4611	minor head protein	-
Paenibacillus larvae	CH981502.1||full	CH981502.1||full__00018	S	307CN	unknown	-	-	-
Paenibacillus larvae	CH981502.1||full	CH981502.1||full__00005	S	34B2Z	unknown	-	-	-
Paenibacillus larvae	CH981502.1||full	CH981502.1||full__00004	Ph	-	-	phrog_10344	minor head protein	-
Paenibacillus larvae	CH981502.1||full	CH981502.1||full__00023	L	2S3P9	C-5 cytosine-specific DNA methylase	-	-	-
Paenibacillus larvae	CH981502.1||full	CH981502.1||full__00007	S	33EYZ	unknown	-	-	-
Paenibacillus larvae	CH981502.1||full	CH981502.1||full__00022	Ph	-	-	phrog_3512	sigma factor	-
Paenibacillus larvae	CH981502.1||full	CH981502.1||full__00001	0			-	-	-
Paenibacillus larvae	CH981502.1||full	CH981502.1||full__00021	S	339UU	unknown	-	-	-
Paenibacillus larvae	CH981502.1||full	CH981502.1||full__00016	Ph	-	-	phrog_2538	terminase small subunit	-
Paenibacillus larvae	CH981502.1||full	CH981502.1||full__00003	S	305KB	unknown	-	-	-
Paenibacillus larvae	CH981502.1||full	CH981502.1||full__00014	Ph	-	-	phrog_38	terminase large subunit	-
Paenibacillus larvae	CH981502.1||full	CH981502.1||full__00008	Ph	-	-	phrog_212	major head protein	-
Paenibacillus larvae	CH981502.1||full	CH981502.1||full__00006	S	33IQ1	unknown	-	-	-
Paenibacillus larvae	CH981502.1||full	CH981502.1||full__00013	Ph	-	-	phrog_533	portal protein	-
Paenibacillus larvae	CH981502.1||full	CH981502.1||full__00002	S	2ZJA0	unknown	-	-	-
Paenibacillus larvae	CH981502.1||full	CH981502.1||full__00009	Ph	-	-	phrog_2303	head scaffolding protein	-
Paenibacillus larvae	CH981502.1||full	CH981502.1||full__00019	Ph	-	-	phrog_497	toxin-antitoxin system HicB-like	Unspecified Moron
Paenibacillus larvae	CH981502.1||full	CH981502.1||full__00012	Ph	-	-	phrog_4611	minor head protein	-
Paenibacillus larvae	CH981511.1||full	CH981511.1||full__00013	Ph	-	-	phrog_19	DnaB-like replicative helicase	-
Paenibacillus larvae	CH981511.1||full	CH981511.1||full__00004	K	COG3561	AntA/AntB antirepressor	-	-	-
Paenibacillus larvae	CH981511.1||full	CH981511.1||full__00014	Ph	-	-	phrog_47	DNA primase	-
Paenibacillus larvae	CH981511.1||full	CH981511.1||full__00012	Ph	-	-	phrog_50	DnaC-like helicase loader	-
Paenibacillus larvae	CH981511.1||full	CH981511.1||full__00008	S	2ZPT8	unknown	-	-	-
Paenibacillus larvae	CH981511.1||full	CH981511.1||full__00007	Ph	-	-	phrog_12720	DNA binding protein	-
Paenibacillus larvae	CH981511.1||full	CH981511.1||full__00005	0			-	-	-
Paenibacillus larvae	CH981511.1||full	CH981511.1||full__00006	S	30R40	unknown	-	-	-
Paenibacillus larvae	CH981511.1||full	CH981511.1||full__00015	S	30DQ3	unknown	-	-	-
Paenibacillus larvae	CH981511.1||full	CH981511.1||full__00003	0			-	-	-
Paenibacillus larvae	CH981511.1||full	CH981511.1||full__00010	S	33J00	unknown	-	-	-
Paenibacillus larvae	CH981511.1||full	CH981511.1||full__00009	Ph	-	-	phrog_154	replication initiation protein	-
Paenibacillus larvae	CH981511.1||full	CH981511.1||full__00002	0			-	-	-
Paenibacillus larvae	CH981511.1||full	CH981511.1||full__00001	Ph	-	-	phrog_15534	HTH DNA binding protein	-
Paenibacillus larvae	CH981511.1||full	CH981511.1||full__00011	0			-	-	-
Paenibacillus larvae	CH981519.1||full	CH981519.1||full__00007	S	33EYZ	unknown	-	-	-
Paenibacillus larvae	CH981519.1||full	CH981519.1||full__00003	Ph	-	-	phrog_533	portal protein	-
Paenibacillus larvae	CH981519.1||full	CH981519.1||full__00012	0			-	-	-
Paenibacillus larvae	CH981519.1||full	CH981519.1||full__00009	S	34B2Z	unknown	-	-	-
Paenibacillus larvae	CH981519.1||full	CH981519.1||full__00013	S	2ZJA0	unknown	-	-	-
Paenibacillus larvae	CH981519.1||full	CH981519.1||full__00011	S	305KB	unknown	-	-	-
Paenibacillus larvae	CH981519.1||full	CH981519.1||full__00016	Ph	-	-	phrog_1533	tail length tape measure protein	-
Paenibacillus larvae	CH981519.1||full	CH981519.1||full__00002	Ph	-	-	phrog_38	terminase large subunit	-
Paenibacillus larvae	CH981519.1||full	CH981519.1||full__00008	S	33IQ1	unknown	-	-	-
Paenibacillus larvae	CH981519.1||full	CH981519.1||full__00006	Ph	-	-	phrog_212	major head protein	-
Paenibacillus larvae	CH981519.1||full	CH981519.1||full__00001	Ph	-	-	phrog_38	terminase large subunit	-
Paenibacillus larvae	CH981519.1||full	CH981519.1||full__00010	Ph	-	-	phrog_10344	minor head protein	-
Paenibacillus larvae	CH981519.1||full	CH981519.1||full__00017	0			-	-	-
Paenibacillus larvae	CH981519.1||full	CH981519.1||full__00014	0			-	-	-
Paenibacillus larvae	CH981519.1||full	CH981519.1||full__00015	Ph	-	-	phrog_1533	tail length tape measure protein	-
Paenibacillus larvae	CH981519.1||full	CH981519.1||full__00004	Ph	-	-	phrog_4611	minor head protein	-
Paenibacillus larvae	CH981519.1||full	CH981519.1||full__00005	Ph	-	-	phrog_2303	head scaffolding protein	-
Melissococcus plutonius	CM003359.1||full	CM003359.1||full__00025	Ph	-	-	phrog_88	major tail protein	-
Melissococcus plutonius	CM003359.1||full	CM003359.1||full__00019	Ph	-	-	phrog_33	distal tail protein Dit	-
Melissococcus plutonius	CM003359.1||full	CM003359.1||full__00061	S	3076P	unknown	-	-	-
Melissococcus plutonius	CM003359.1||full	CM003359.1||full__00026	Ph	-	-	phrog_1217	tail protein	-
Melissococcus plutonius	CM003359.1||full	CM003359.1||full__00049	S	32SWP	Putative HNHc nuclease	-	-	-
Melissococcus plutonius	CM003359.1||full	CM003359.1||full__00020	Ph	-	-	phrog_167	tail length tape measure protein	-
Melissococcus plutonius	CM003359.1||full	CM003359.1||full__00021	Ph	-	-	phrog_21157	minor tail protein	-
Melissococcus plutonius	CM003359.1||full	CM003359.1||full__00007	0			-	-	-
Melissococcus plutonius	CM003359.1||full	CM003359.1||full__00051	Ph	-	-	phrog_253	Mu Gam-like end protection	-
Melissococcus plutonius	CM003359.1||full	CM003359.1||full__00054	0			-	-	-
Melissococcus plutonius	CM003359.1||full	CM003359.1||full__00028	Ph	-	-		NA	-
Melissococcus plutonius	CM003359.1||full	CM003359.1||full__00013	S	32Q2N	unknown	-	-	-
Melissococcus plutonius	CM003359.1||full	CM003359.1||full__00029	Ph	-	-	phrog_40	head-tail adaptor Ad1	-
Melissococcus plutonius	CM003359.1||full	CM003359.1||full__00003	S	335I5	unknown	-	-	-
Melissococcus plutonius	CM003359.1||full	CM003359.1||full__00023	Ph	-	-		NA	-
Melissococcus plutonius	CM003359.1||full	CM003359.1||full__00063	Ph	-	-	phrog_130	anti-repressor Ant	-
Melissococcus plutonius	CM003359.1||full	CM003359.1||full__00032	Ph	-	-	phrog_12	portal protein	-
Melissococcus plutonius	CM003359.1||full	CM003359.1||full__00042	0			-	-	-
Melissococcus plutonius	CM003359.1||full	CM003359.1||full__00043	0			-	-	-
Melissococcus plutonius	CM003359.1||full	CM003359.1||full__00008	0			-	-	-
Melissococcus plutonius	CM003359.1||full	CM003359.1||full__00031	Ph	-	-	phrog_80	head maturation protease	-
Melissococcus plutonius	CM003359.1||full	CM003359.1||full__00027	Ph	-	-	phrog_5	tail completion or Neck1 protein	-
Melissococcus plutonius	CM003359.1||full	CM003359.1||full__00015	Ph	-	-	phrog_6183	minor tail protein	-
Melissococcus plutonius	CM003359.1||full	CM003359.1||full__00016	0			-	-	-
Melissococcus plutonius	CM003359.1||full	CM003359.1||full__00062	0			-	-	-
Melissococcus plutonius	CM003359.1||full	CM003359.1||full__00004	S	32XSW	unknown	-	-	-
Melissococcus plutonius	CM003359.1||full	CM003359.1||full__00038	S	30JP1	unknown	-	-	-
Melissococcus plutonius	CM003359.1||full	CM003359.1||full__00018	Ph	-	-	phrog_326	tail protein with endopeptidase domain	-
Melissococcus plutonius	CM003359.1||full	CM003359.1||full__00036	Ph	-	-	phrog_144	HNH endonuclease	-
Melissococcus plutonius	CM003359.1||full	CM003359.1||full__00048	Ph	-	-	phrog_4880	replisome organizer	-
Melissococcus plutonius	CM003359.1||full	CM003359.1||full__00039	0			-	-	-
Melissococcus plutonius	CM003359.1||full	CM003359.1||full__00068	Ph	-	-	phrog_373	anti-repressor	-
Melissococcus plutonius	CM003359.1||full	CM003359.1||full__00067	Ph	-	-	phrog_643	transcriptional regulator	-
Melissococcus plutonius	CM003359.1||full	CM003359.1||full__00014	Ph	-	-	phrog_7389	tail fiber protein	-
Melissococcus plutonius	CM003359.1||full	CM003359.1||full__00009	Ph	-	-	phrog_291	endolysin	-
Melissococcus plutonius	CM003359.1||full	CM003359.1||full__00010	Ph	-	-	phrog_881	holin	-
Melissococcus plutonius	CM003359.1||full	CM003359.1||full__00011	Ph	-	-	phrog_2429	involved in bacteriocin production or immunity	Unspecified Moron
Melissococcus plutonius	CM003359.1||full	CM003359.1||full__00064	S	33KKC	unknown	-	-	-
Melissococcus plutonius	CM003359.1||full	CM003359.1||full__00024	Ph	-	-	phrog_34916	tail fiber protein	-
Melissococcus plutonius	CM003359.1||full	CM003359.1||full__00001	Ph	-	-	phrog_8	transcriptional regulator	-
Melissococcus plutonius	CM003359.1||full	CM003359.1||full__00002	Ph	-	-	phrog_1	integrase	-
Melissococcus plutonius	CM003359.1||full	CM003359.1||full__00012	Ph	-	-	phrog_134	NA	-
Melissococcus plutonius	CM003359.1||full	CM003359.1||full__00050	Ph	-	-	phrog_155	Erf-like ssDNA annealing protein	-
Melissococcus plutonius	CM003359.1||full	CM003359.1||full__00056	S	32UWV	unknown	-	-	-
Melissococcus plutonius	CM003359.1||full	CM003359.1||full__00041	S	33670	unknown	-	-	-
Melissococcus plutonius	CM003359.1||full	CM003359.1||full__00040	Ph	-	-	phrog_36	transcriptional regulator	-
Melissococcus plutonius	CM003359.1||full	CM003359.1||full__00022	0			-	-	-
Melissococcus plutonius	CM003359.1||full	CM003359.1||full__00006	0			-	-	-
Melissococcus plutonius	CM003359.1||full	CM003359.1||full__00030	Ph	-	-	phrog_10	major head protein	-
Melissococcus plutonius	CM003359.1||full	CM003359.1||full__00053	0			-	-	-
Melissococcus plutonius	CM003359.1||full	CM003359.1||full__00035	Ph	-	-	phrog_83	terminase small subunit	-
Melissococcus plutonius	CM003359.1||full	CM003359.1||full__00017	0			-	-	-
Melissococcus plutonius	CM003359.1||full	CM003359.1||full__00034	Ph	-	-	phrog_4914	terminase large subunit	-
Melissococcus plutonius	CM003359.1||full	CM003359.1||full__00037	0			-	-	-
Melissococcus plutonius	CM003359.1||full	CM003359.1||full__00005	Ph	-	-	phrog_3996	membrane protein	Unspecified Moron
Melissococcus plutonius	CM003359.1||full	CM003359.1||full__00059	Ph	-	-	phrog_5817	anti-repressor Ant	-
Melissococcus plutonius	CM003359.1||full	CM003359.1||full__00055	0			-	-	-
Melissococcus plutonius	CM003359.1||full	CM003359.1||full__00070	S	324BD	unknown	-	-	-
Melissococcus plutonius	CM003359.1||full	CM003359.1||full__00066	S	331IF	unknown	-	-	-
Melissococcus plutonius	CM003359.1||full	CM003359.1||full__00058	0			-	-	-
Melissococcus plutonius	CM003359.1||full	CM003359.1||full__00069	S	30BSH	unknown	-	-	-
Melissococcus plutonius	CM003359.1||full	CM003359.1||full__00044	0			-	-	-
Melissococcus plutonius	CM003359.1||full	CM003359.1||full__00045	Ph	-	-	phrog_140	RusA-like Holliday junction resolvase	-
Melissococcus plutonius	CM003359.1||full	CM003359.1||full__00033	Ph	-	-	phrog_9	terminase large subunit	-
Melissococcus plutonius	CM003359.1||full	CM003359.1||full__00065	Ph	-	-	phrog_4	transcriptional repressor	-
Melissococcus plutonius	CM003359.1||full	CM003359.1||full__00060	S	303VE	unknown	-	-	-
Melissococcus plutonius	CM003359.1||full	CM003359.1||full__00057	0			-	-	-
Melissococcus plutonius	CM003359.1||full	CM003359.1||full__00046	Ph	-	-	phrog_44	single strand DNA binding protein	-
Melissococcus plutonius	CM003359.1||full	CM003359.1||full__00047	0			-	-	-
Melissococcus plutonius	CM003359.1||full	CM003359.1||full__00052	0			-	-	-
Gilliamella apicola	CM004509.1||0_partial_1	CM004509.1||0_partial_1__00043	0			-	-	-
Gilliamella apicola	CM004509.1||0_partial_1	CM004509.1||0_partial_1__00041	0			-	-	-
Gilliamella apicola	CM004509.1||0_partial_1	CM004509.1||0_partial_1__00007	Ph	-	-	phrog_6416	tail protein	-
Gilliamella apicola	CM004509.1||0_partial_1	CM004509.1||0_partial_1__00010	Ph	-	-	phrog_23	tail sheath	-
Gilliamella apicola	CM004509.1||0_partial_1	CM004509.1||0_partial_1__00005	Ph	-	-	phrog_76	tail protein	-
Gilliamella apicola	CM004509.1||0_partial_1	CM004509.1||0_partial_1__00001	S	316V4	cellular response to DNA damage stimulus	-	-	-
Gilliamella apicola	CM004509.1||0_partial_1	CM004509.1||0_partial_1__00045	Ph	-	-	phrog_9710	NA	-
Gilliamella apicola	CM004509.1||0_partial_1	CM004509.1||0_partial_1__00009	Ph	-	-	phrog_55	head closure	-
Gilliamella apicola	CM004509.1||0_partial_1	CM004509.1||0_partial_1__00008	Ph	-	-	phrog_103	tail protein	-
Gilliamella apicola	CM004509.1||0_partial_1	CM004509.1||0_partial_1__00004	Ph	-	-	phrog_52	tail protein	-
Gilliamella apicola	CM004509.1||0_partial_1	CM004509.1||0_partial_1__00011	Ph	-	-	phrog_105	tail fiber assembly	-
Gilliamella apicola	CM004509.1||0_partial_1	CM004509.1||0_partial_1__00026	Ph	-	-	phrog_105	tail fiber assembly	-
Gilliamella apicola	CM004509.1||0_partial_1	CM004509.1||0_partial_1__00016	Ph	-	-	phrog_381	tail fiber protein	-
Gilliamella apicola	CM004509.1||0_partial_1	CM004509.1||0_partial_1__00044	Ph	-	-	phrog_575	Cox-like excisionase and repressor	-
Gilliamella apicola	CM004509.1||0_partial_1	CM004509.1||0_partial_1__00019	Ph	-	-	phrog_381	tail fiber protein	-
Gilliamella apicola	CM004509.1||0_partial_1	CM004509.1||0_partial_1__00022	Ph	-	-	phrog_327	tail protein	-
Gilliamella apicola	CM004509.1||0_partial_1	CM004509.1||0_partial_1__00038	0			-	-	-
Gilliamella apicola	CM004509.1||0_partial_1	CM004509.1||0_partial_1__00020	Ph	-	-	phrog_381	tail fiber protein	-
Gilliamella apicola	CM004509.1||0_partial_1	CM004509.1||0_partial_1__00023	Ph	-	-	phrog_381	tail fiber protein	-
Gilliamella apicola	CM004509.1||0_partial_1	CM004509.1||0_partial_1__00029	Ph	-	-	phrog_4226	baseplate protein	-
Gilliamella apicola	CM004509.1||0_partial_1	CM004509.1||0_partial_1__00042	0			-	-	-
Gilliamella apicola	CM004509.1||0_partial_1	CM004509.1||0_partial_1__00018	Ph	-	-	phrog_327	tail protein	-
Gilliamella apicola	CM004509.1||0_partial_1	CM004509.1||0_partial_1__00012	Ph	-	-	phrog_381	tail fiber protein	-
Gilliamella apicola	CM004509.1||0_partial_1	CM004509.1||0_partial_1__00028	Ph	-	-	phrog_48	tail protein	-
Gilliamella apicola	CM004509.1||0_partial_1	CM004509.1||0_partial_1__00024	Ph	-	-	phrog_105	tail fiber assembly	-
Gilliamella apicola	CM004509.1||0_partial_1	CM004509.1||0_partial_1__00025	Ph	-	-	phrog_381	tail fiber protein	-
Gilliamella apicola	CM004509.1||0_partial_1	CM004509.1||0_partial_1__00036	Ph	-	-	phrog_214	Rz-like spanin	-
Gilliamella apicola	CM004509.1||0_partial_1	CM004509.1||0_partial_1__00035	Ph	-	-	phrog_46	baseplate hub	-
Gilliamella apicola	CM004509.1||0_partial_1	CM004509.1||0_partial_1__00046	Ph	-	-	phrog_1	integrase	-
Gilliamella apicola	CM004509.1||0_partial_1	CM004509.1||0_partial_1__00015	Ph	-	-	phrog_105	tail fiber assembly	-
Gilliamella apicola	CM004509.1||0_partial_1	CM004509.1||0_partial_1__00030	Ph	-	-	phrog_43	baseplate wedge subunit	-
Gilliamella apicola	CM004509.1||0_partial_1	CM004509.1||0_partial_1__00017	Ph	-	-	phrog_105	tail fiber assembly	-
Gilliamella apicola	CM004509.1||0_partial_1	CM004509.1||0_partial_1__00032	Ph	-	-	phrog_65	tail terminator	-
Gilliamella apicola	CM004509.1||0_partial_1	CM004509.1||0_partial_1__00013	Ph	-	-	phrog_105	tail fiber assembly	-
[truncated: 9,968 more rows]
