# Supplementary material for: Characterization of prophages in bacterial genomes from the honey bee (Apis mellifera) gut microbiome
Source: PeerJ. 2023 Jun 9;11:e15383. doi: 10.7717/peerj.15383 (PMC10259446; doi:10.7717/peerj.15383)
Supplement: Table S8 — The vConTACT2 cluster assigned to each phage. [file peerj-11-15383-s009.xlsx]

## Sheet: TableS8
name	hb_or_ref	FinalGroup	Description	vContact_Cluster	Fig4_Num	Adjusted.P.value	Family	Genus	Genus.Confidence.Score	preVC	Quality	selected	Sub.family	Topology.Confidence.Score	VC	VC.Avg.Distance	VC.Size	VC.Status
VMHM01000003.1||0_partial_1_	from_hb	Gilliamella apicola	NA	VC_982_0	44	0.999817	hb_hits	NA	1	preVC_982	0.7984	TRUE	NA	0.7982	VC_982_0	2.53455	5	Clustered
VMHM01000008.1||0_partial_1_	from_hb	Gilliamella apicola	NA	VC_982_0	44	0.999817	hb_hits	NA	1	preVC_982	0.7984	TRUE	NA	0.7982	VC_982_0	2.53455	5	Clustered
JAIM01000024.1||full_1_	from_hb	Gilliamella apicola	NA	VC_982_0	44	0.999817	hb_hits	NA	1	preVC_982	0.7984	TRUE	NA	0.7982	VC_982_0	2.53455	5	Clustered
MZNI01000010.1||0_partial_1_	from_hb	Gilliamella apicola	NA	VC_982_0	44	0.999817	hb_hits	NA	1	preVC_982	0.7984	TRUE	NA	0.7982	VC_982_0	2.53455	5	Clustered
NARR01000049.1||full_	from_hb	Gilliamella apicola	NA	VC_982_0	44	0.999817	hb_hits	NA	1	preVC_982	0.7984	TRUE	NA	0.7982	VC_982_0	2.53455	5	Clustered
NXEN01000063.1||0_partial_1_	from_hb	Snodgrassella alvi	NA	VC_981_0	43	0.934523	hb_hits	NA	1	preVC_981	0.1329	TRUE	NA	0.1242	VC_981_0	4.15694	4	Clustered
NAHF01000049.1||full_	from_hb	Snodgrassella alvi	NA	VC_981_0	43	0.934523	hb_hits	NA	1	preVC_981	0.1329	TRUE	NA	0.1242	VC_981_0	4.15694	4	Clustered
NAHB01000016.1||full_	from_hb	Snodgrassella alvi	NA	VC_981_0	43	0.934523	hb_hits	NA	1	preVC_981	0.1329	TRUE	NA	0.1242	VC_981_0	4.15694	4	Clustered
NAGY01000049.1||0_partial_1_	from_hb	Snodgrassella alvi	NA	VC_981_0	43	0.934523	hb_hits	NA	1	preVC_981	0.1329	TRUE	NA	0.1242	VC_981_0	4.15694	4	Clustered
NASC01000102.1||full_	from_hb	Gilliamella apicola	NA	VC_946_0	42	0	hb_hits	NA	1	preVC_946	0	TRUE	NA	0	VC_946_0	0	1	Clustered/Singleton
U24159	inphared	NA	NA	VC_90_0	11	1	NA	NA	1	preVC_90	0.9015	TRUE	NA	0.9015	VC_90_0	5.75411	27	Clustered
MT662115	inphared	NA	Vibrio phage ValB1MD-2	VC_90_0	11	1	Peduoviridae	Valbvirus	1	preVC_90	0.9015	TRUE	Unclassified	0.9015	VC_90_0	5.75411	27	Clustered
MN563793	inphared	NA	Vibrio phage Valm-yong1	VC_90_0	11	1	Peduoviridae	Yongunavirus	1	preVC_90	0.9015	TRUE	Unclassified	0.9015	VC_90_0	5.75411	27	Clustered
OP484843	inphared	NA	Aeromonas phage A051	VC_90_0	11	1	Peduoviridae	Bielevirus	1	preVC_90	0.9015	TRUE	Unclassified	0.9015	VC_90_0	5.75411	27	Clustered
OM095401	inphared	NA	Yersinia phage vB_YenM_324	VC_90_0	11	1	Peduoviridae	Unclassified	1	preVC_90	0.9015	TRUE	Unclassified	0.9015	VC_90_0	5.75411	27	Clustered
MK972712	inphared	NA	Salmonella phage SI7	VC_90_0	11	1	Peduoviridae	Irrigatiovirus	1	preVC_90	0.9015	TRUE	Unclassified	0.9015	VC_90_0	5.75411	27	Clustered
MG592573	inphared	NA	Vibrio phage 1.202.O._10N.222.45.E8	VC_90_0	11	1	Peduoviridae	Canoevirus	1	preVC_90	0.9015	TRUE	Unclassified	0.9015	VC_90_0	5.75411	27	Clustered
MK972714	inphared	NA	Salmonella phage SW3	VC_90_0	11	1	Peduoviridae	Irrigatiovirus	1	preVC_90	0.9015	TRUE	Unclassified	0.9015	VC_90_0	5.75411	27	Clustered
MK972713	inphared	NA	Salmonella phage SW5	VC_90_0	11	1	Peduoviridae	Irrigatiovirus	1	preVC_90	0.9015	TRUE	Unclassified	0.9015	VC_90_0	5.75411	27	Clustered
LR597640	inphared	NA	Escherichia phage ESSI2_ev129	VC_90_0	11	1	Peduoviridae	Quadragintavirus	1	preVC_90	0.9015	TRUE	Unclassified	0.9015	VC_90_0	5.75411	27	Clustered
LR597638	inphared	NA	Escherichia phage ESSI2_ev040	VC_90_0	11	1	Peduoviridae	Quadragintavirus	1	preVC_90	0.9015	TRUE	Unclassified	0.9015	VC_90_0	5.75411	27	Clustered
LZGJ01000046.1||full_	from_hb	Gilliamella apicola	NA	VC_90_0	11	1	hb_hits	NA	1	preVC_90	0.9015	TRUE	NA	0.9015	VC_90_0	5.75411	27	Clustered
LR597649	inphared	NA	Escherichia phage ESSI2_ev015	VC_90_0	11	1	Peduoviridae	Quadragintavirus	1	preVC_90	0.9015	TRUE	Unclassified	0.9015	VC_90_0	5.75411	27	Clustered
KX774374	inphared	NA	Salinivibrio phage SMHB1	VC_90_0	11	1	Peduoviridae	Playavirus	1	preVC_90	0.9015	TRUE	Unclassified	0.9015	VC_90_0	5.75411	27	Clustered
KX058879	inphared	NA	Vibrio phage VcP032	VC_90_0	11	1	Peduoviridae	Longwoodvirus	1	preVC_90	0.9015	TRUE	Unclassified	0.9015	VC_90_0	5.75411	27	Clustered
LR597637	inphared	NA	Escherichia phage ESSI2_ev239	VC_90_0	11	1	Peduoviridae	Evevirus	1	preVC_90	0.9015	TRUE	Unclassified	0.9015	VC_90_0	5.75411	27	Clustered
KY045851	inphared	NA	Pseudoalteromonas phage C5a	VC_90_0	11	1	Peduoviridae	Catalunyavirus	1	preVC_90	0.9015	TRUE	Unclassified	0.9015	VC_90_0	5.75411	27	Clustered
KF361475	inphared	NA	Vibrio phage VPUSM 8	VC_90_0	11	1	Peduoviridae	Longwoodvirus	1	preVC_90	0.9015	TRUE	Unclassified	0.9015	VC_90_0	5.75411	27	Clustered
HQ110083	inphared	NA	Cronobacter phage ESSI-2	VC_90_0	11	1	Peduoviridae	Seongnamvirus	1	preVC_90	0.9015	TRUE	Unclassified	0.9015	VC_90_0	5.75411	27	Clustered
KU504502	inphared	NA	Vibrio phage 919TP	VC_90_0	11	1	Peduoviridae	Longwoodvirus	1	preVC_90	0.9015	TRUE	Unclassified	0.9015	VC_90_0	5.75411	27	Clustered
KT887559	inphared	NA	Pseudomonas phage phi3	VC_90_0	11	1	Peduoviridae	Phitrevirus	1	preVC_90	0.9015	TRUE	Unclassified	0.9015	VC_90_0	5.75411	27	Clustered
DQ114220	inphared	NA	Pasteurella phage F108	VC_90_0	11	1	Peduoviridae	Irtavirus	1	preVC_90	0.9015	TRUE	Unclassified	0.9015	VC_90_0	5.75411	27	Clustered
AY027935	inphared	NA	Haemophilus phage HP2	VC_90_0	11	1	Peduoviridae	Hpunavirus	1	preVC_90	0.9015	TRUE	Unclassified	0.9015	VC_90_0	5.75411	27	Clustered
HG803181	inphared	NA	Vibrio phage PV94	VC_90_0	11	1	Peduoviridae	Vulnificusvirus	1	preVC_90	0.9015	TRUE	Unclassified	0.9015	VC_90_0	5.75411	27	Clustered
DQ674738	inphared	NA	Aeromonas phage phiO18P	VC_90_0	11	1	Peduoviridae	Bielevirus	1	preVC_90	0.9015	TRUE	Unclassified	0.9015	VC_90_0	5.75411	27	Clustered
AB374228	inphared	NA	Vibrio phage Kappa	VC_90_0	11	1	Peduoviridae	Longwoodvirus	1	preVC_90	0.9015	TRUE	Unclassified	0.9015	VC_90_0	5.75411	27	Clustered
AF125163	inphared	NA	Bacteriophage K139	VC_90_0	11	1	Peduoviridae	Longwoodvirus	1	preVC_90	0.9015	TRUE	Unclassified	0.9015	VC_90_0	5.75411	27	Clustered
MH460825	inphared	NA	Paenibacillus phage Scottie	VC_9_0	9	1	Unclassified	Halcyonevirus	1	preVC_9	0.5058	TRUE	Unclassified	0.5058	VC_9_0	5.72201	13	Clustered
MH460824	inphared	NA	Paenibacillus phage Unity	VC_9_0	9	1	Unclassified	Halcyonevirus	1	preVC_9	0.5058	TRUE	Unclassified	0.5058	VC_9_0	5.72201	13	Clustered
MH460827	inphared	NA	Paenibacillus phage Halcyone	VC_9_0	9	1	Unclassified	Halcyonevirus	1	preVC_9	0.5058	TRUE	Unclassified	0.5058	VC_9_0	5.72201	13	Clustered
MH460826	inphared	NA	Paenibacillus phage Heath	VC_9_0	9	1	Unclassified	Halcyonevirus	1	preVC_9	0.5058	TRUE	Unclassified	0.5058	VC_9_0	5.72201	13	Clustered
MH431938	inphared	NA	Paenibacillus phage C7Cdelta	VC_9_0	9	1	Unclassified	Halcyonevirus	1	preVC_9	0.5058	TRUE	Unclassified	0.5058	VC_9_0	5.72201	13	Clustered
KT755656	inphared	NA	Paenibacillus phage Tripp	VC_9_0	9	1	Unclassified	Halcyonevirus	1	preVC_9	0.5058	TRUE	Unclassified	0.5058	VC_9_0	5.72201	13	Clustered
MH454080	inphared	NA	Paenibacillus phage Ley	VC_9_0	9	1	Unclassified	Halcyonevirus	1	preVC_9	0.5058	TRUE	Unclassified	0.5058	VC_9_0	5.72201	13	Clustered
MH454076	inphared	NA	Paenibacillus phage Ash	VC_9_0	9	1	Unclassified	Halcyonevirus	1	preVC_9	0.5058	TRUE	Unclassified	0.5058	VC_9_0	5.72201	13	Clustered
CP019717.1||1_partial_1_	from_hb	Paenibacillus larvae	NA	VC_9_0	9	1	hb_hits	NA	1	preVC_9	0.5058	TRUE	NA	0.5058	VC_9_0	5.72201	13	Clustered
CP019687.1||3_partial_1_	from_hb	Paenibacillus larvae	NA	VC_9_0	9	1	hb_hits	NA	1	preVC_9	0.5058	TRUE	NA	0.5058	VC_9_0	5.72201	13	Clustered
CP019794.1||0_partial_1_	from_hb	Paenibacillus larvae	NA	VC_9_0	9	1	hb_hits	NA	1	preVC_9	0.5058	TRUE	NA	0.5058	VC_9_0	5.72201	13	Clustered
CP019652.1||0_partial_1_	from_hb	Paenibacillus larvae	NA	VC_9_0	9	1	hb_hits	NA	1	preVC_9	0.5058	TRUE	NA	0.5058	VC_9_0	5.72201	13	Clustered
ADFW01000001.1||2_partial_1_	from_hb	Paenibacillus larvae	NA	VC_9_0	9	1	hb_hits	NA	1	preVC_9	0.5058	TRUE	NA	0.5058	VC_9_0	5.72201	13	Clustered
NAHD01000043.1||full_	from_hb	Snodgrassella alvi	NA	VC_881_0	41	0.888349	hb_hits	NA	1	preVC_881	0.3563	TRUE	NA	0.3165	VC_881_0	4.12311	2	Clustered
NAHB01000035.1||full_	from_hb	Snodgrassella alvi	NA	VC_881_0	41	0.888349	hb_hits	NA	1	preVC_881	0.3563	TRUE	NA	0.3165	VC_881_0	4.12311	2	Clustered
LXYS01000002.1||0_partial_1_	from_hb	Bartonella apis	NA	VC_777_0	40	0.999964	hb_hits	NA	1	preVC_777	0.861	TRUE	NA	0.8609	VC_777_0	2.92777	5	Clustered
LXYU01000003.1||0_partial_1_	from_hb	Bartonella apis	NA	VC_777_0	40	0.999964	hb_hits	NA	1	preVC_777	0.861	TRUE	NA	0.8609	VC_777_0	2.92777	5	Clustered
CP015820.1||0_partial_1_	from_hb	Bartonella apis	NA	VC_777_0	40	0.999964	hb_hits	NA	1	preVC_777	0.861	TRUE	NA	0.8609	VC_777_0	2.92777	5	Clustered
CP015821.1||0_partial_1_	from_hb	Bartonella apis	NA	VC_777_0	40	0.999964	hb_hits	NA	1	preVC_777	0.861	TRUE	NA	0.8609	VC_777_0	2.92777	5	Clustered
CP015625.1||0_partial_1_	from_hb	Bartonella apis	NA	VC_777_0	40	0.999964	hb_hits	NA	1	preVC_777	0.861	TRUE	NA	0.8609	VC_777_0	2.92777	5	Clustered
CP009056.1||1_partial_1_	from_hb	Frischella perrara	NA	VC_775_0	39	0.905834	hb_hits	NA	1	preVC_775	0.0846	TRUE	NA	0.0766	VC_775_0	3	2	Clustered
QGLM01000017.1||0_partial_1_	from_hb	Frischella perrara	NA	VC_775_0	39	0.905834	hb_hits	NA	1	preVC_775	0.0846	TRUE	NA	0.0766	VC_775_0	3	2	Clustered
NASJ01000006.1||0_partial_1_	from_hb	Gilliamella apis	NA	VC_774_0	38	0.999997	hb_hits	NA	1	preVC_774	0.4725	TRUE	NA	0.4725	VC_774_0	3.24369	5	Clustered
NASF01000035.1||full_1_	from_hb	Gilliamella apis	NA	VC_774_0	38	0.999997	hb_hits	NA	1	preVC_774	0.4725	TRUE	NA	0.4725	VC_774_0	3.24369	5	Clustered
NASI01000055.1||full_	from_hb	Gilliamella apis	NA	VC_774_0	38	0.999997	hb_hits	NA	1	preVC_774	0.4725	TRUE	NA	0.4725	VC_774_0	3.24369	5	Clustered
NASK01000078.1||full_1_	from_hb	Gilliamella apis	NA	VC_774_0	38	0.999997	hb_hits	NA	1	preVC_774	0.4725	TRUE	NA	0.4725	VC_774_0	3.24369	5	Clustered
NASM01000083.1||full_1_	from_hb	Gilliamella apis	NA	VC_774_0	38	0.999997	hb_hits	NA	1	preVC_774	0.4725	TRUE	NA	0.4725	VC_774_0	3.24369	5	Clustered
VMHJ01000002.1||0_partial_1_	from_hb	Bifidobacterium asteroides	NA	VC_772_0	37	0.885333	hb_hits	NA	1	preVC_772	0.183	TRUE	NA	0.162	VC_772_0	6.85565	2	Clustered
GQ141189	inphared	NA	Bifidobacterium phage Bbif-1	VC_772_0	37	0.885333	Siphoviridae	Unclassified	1	preVC_772	0.183	TRUE	Unclassified	0.162	VC_772_0	6.85565	2	Clustered
WKKW01000001.1||0_partial_1_	from_hb	Bifidobacterium asteroides	NA	VC_771_0	36	0.998871	hb_hits	NA	1	preVC_771	0.5503	TRUE	NA	0.5497	VC_771_0	6.25075	3	Clustered
QGLH01000003.1||0_partial_1_	from_hb	Bifidobacterium asteroides	NA	VC_771_0	36	0.998871	hb_hits	NA	1	preVC_771	0.5503	TRUE	NA	0.5497	VC_771_0	6.25075	3	Clustered
MT006237	inphared	NA	Bifidobacterium phage BigBern1	VC_771_0	36	0.998871	Siphoviridae	Unclassified	1	preVC_771	0.5503	TRUE	Unclassified	0.5497	VC_771_0	6.25075	3	Clustered
MZNG01000103.1||full_	from_hb	Gilliamella apicola	NA	VC_767_0	35	0.993734	hb_hits	NA	1	preVC_767	0.0699	TRUE	NA	0.0694	VC_767_0	1.13807	3	Clustered
MZNE01000088.1||full_	from_hb	Gilliamella apicola	NA	VC_767_0	35	0.993734	hb_hits	NA	1	preVC_767	0.0699	TRUE	NA	0.0694	VC_767_0	1.13807	3	Clustered
NAHR01000040.1||full_1_	from_hb	Gilliamella apicola	NA	VC_767_0	35	0.993734	hb_hits	NA	1	preVC_767	0.0699	TRUE	NA	0.0694	VC_767_0	1.13807	3	Clustered
MZNH01000051.1||full_	from_hb	Gilliamella apicola	NA	VC_766_0	34	0.998774	hb_hits	NA	1	preVC_766	0.2607	TRUE	NA	0.2604	VC_766_0	1.63539	7	Clustered
MZNI01000033.1||full_1_	from_hb	Gilliamella apicola	NA	VC_766_0	34	0.998774	hb_hits	NA	1	preVC_766	0.2607	TRUE	NA	0.2604	VC_766_0	1.63539	7	Clustered
JAIM01000015.1||full_1_	from_hb	Gilliamella apicola	NA	VC_766_0	34	0.998774	hb_hits	NA	1	preVC_766	0.2607	TRUE	NA	0.2604	VC_766_0	1.63539	7	Clustered
JAIN01000055.1||full_	from_hb	Gilliamella apicola	NA	VC_766_0	34	0.998774	hb_hits	NA	1	preVC_766	0.2607	TRUE	NA	0.2604	VC_766_0	1.63539	7	Clustered
NARV01000043.1||full_1_	from_hb	Gilliamella apicola	NA	VC_766_0	34	0.998774	hb_hits	NA	1	preVC_766	0.2607	TRUE	NA	0.2604	VC_766_0	1.63539	7	Clustered
NARN01000040.1||full_1_	from_hb	Gilliamella apicola	NA	VC_766_0	34	0.998774	hb_hits	NA	1	preVC_766	0.2607	TRUE	NA	0.2604	VC_766_0	1.63539	7	Clustered
NARO01000026.1||full_1_	from_hb	Gilliamella apicola	NA	VC_766_0	34	0.998774	hb_hits	NA	1	preVC_766	0.2607	TRUE	NA	0.2604	VC_766_0	1.63539	7	Clustered
AZBY01000020.1||0_partial_	from_hb	Lactobacillus kunkeei	NA	VC_730_0	33	0.714286	hb_hits	NA	1	preVC_730	0.5553	TRUE	NA	0.3967	VC_730_0	1.41421	2	Clustered
QUBN01000015.1||0_partial_	from_hb	Lactobacillus kunkeei	NA	VC_730_0	33	0.714286	hb_hits	NA	1	preVC_730	0.5553	TRUE	NA	0.3967	VC_730_0	1.41421	2	Clustered
KQ440388.1||0_partial_1_	from_hb	Lactobacillus kunkeei	NA	VC_729_0	32	0.99403	hb_hits	NA	1	preVC_729	0.736	TRUE	NA	0.7316	VC_729_0	5.09102	3	Clustered
QUBO01000010.1||full_	from_hb	Lactobacillus kunkeei	NA	VC_729_0	32	0.99403	hb_hits	NA	1	preVC_729	0.736	TRUE	NA	0.7316	VC_729_0	5.09102	3	Clustered
CP012920.1||0_partial_1_	from_hb	Lactobacillus kunkeei	NA	VC_729_0	32	0.99403	hb_hits	NA	1	preVC_729	0.736	TRUE	NA	0.7316	VC_729_0	5.09102	3	Clustered
NAHO01000019.1||full_1_	from_hb	Snodgrassella alvi	NA	VC_608_0	31	0.876071	hb_hits	NA	1	preVC_608	0.238	TRUE	NA	0.2085	VC_608_0	0	2	Clustered
NAHM01000052.1||full_1_	from_hb	Snodgrassella alvi	NA	VC_608_0	31	0.876071	hb_hits	NA	1	preVC_608	0.238	TRUE	NA	0.2085	VC_608_0	0	2	Clustered
QGLS01000008.1||full_1_	from_hb	Snodgrassella alvi	NA	VC_607_0	30	1	hb_hits	NA	1	preVC_607	0.5191	TRUE	NA	0.5191	VC_607_0	6.25253	13	Clustered
NAHJ01000054.1||full_	from_hb	Snodgrassella alvi	NA	VC_607_0	30	1	hb_hits	NA	1	preVC_607	0.5191	TRUE	NA	0.5191	VC_607_0	6.25253	13	Clustered
NAGZ01000117.1||full_1_	from_hb	Snodgrassella alvi	NA	VC_607_0	30	1	hb_hits	NA	1	preVC_607	0.5191	TRUE	NA	0.5191	VC_607_0	6.25253	13	Clustered
NAHF01000117.1||full_1_	from_hb	Snodgrassella alvi	NA	VC_607_0	30	1	hb_hits	NA	1	preVC_607	0.5191	TRUE	NA	0.5191	VC_607_0	6.25253	13	Clustered
MEIX01000067.1||full_	from_hb	Snodgrassella alvi	NA	VC_607_0	30	1	hb_hits	NA	1	preVC_607	0.5191	TRUE	NA	0.5191	VC_607_0	6.25253	13	Clustered
MEIV01000053.1||full_1_	from_hb	Snodgrassella alvi	NA	VC_607_0	30	1	hb_hits	NA	1	preVC_607	0.5191	TRUE	NA	0.5191	VC_607_0	6.25253	13	Clustered
MEIN01000013.1||full_	from_hb	Snodgrassella alvi	NA	VC_607_0	30	1	hb_hits	NA	1	preVC_607	0.5191	TRUE	NA	0.5191	VC_607_0	6.25253	13	Clustered
NAHG01000135.1||full_	from_hb	Snodgrassella alvi	NA	VC_607_0	30	1	hb_hits	NA	1	preVC_607	0.5191	TRUE	NA	0.5191	VC_607_0	6.25253	13	Clustered
NAHD01000052.1||full_	from_hb	Snodgrassella alvi	NA	VC_607_0	30	1	hb_hits	NA	1	preVC_607	0.5191	TRUE	NA	0.5191	VC_607_0	6.25253	13	Clustered
NAHN01000070.1||full_1_	from_hb	Snodgrassella alvi	NA	VC_607_0	30	1	hb_hits	NA	1	preVC_607	0.5191	TRUE	NA	0.5191	VC_607_0	6.25253	13	Clustered
NAGW01000077.1||full_1_	from_hb	Snodgrassella alvi	NA	VC_607_0	30	1	hb_hits	NA	1	preVC_607	0.5191	TRUE	NA	0.5191	VC_607_0	6.25253	13	Clustered
NAGY01000035.1||full_	from_hb	Snodgrassella alvi	NA	VC_607_0	30	1	hb_hits	NA	1	preVC_607	0.5191	TRUE	NA	0.5191	VC_607_0	6.25253	13	Clustered
MEIJ01000002.1||0_partial_1_	from_hb	Snodgrassella alvi	NA	VC_607_0	30	1	hb_hits	NA	1	preVC_607	0.5191	TRUE	NA	0.5191	VC_607_0	6.25253	13	Clustered
MEIX01000091.1||full_1_	from_hb	Snodgrassella alvi	NA	VC_606_0	29	0	hb_hits	NA	1	preVC_606	0	TRUE	NA	0	VC_606_0	0	1	Clustered/Singleton
NAHG01000084.1||full_	from_hb	Snodgrassella alvi	NA	VC_605_0	28	0.994806	hb_hits	NA	1	preVC_605	0.2612	TRUE	NA	0.2599	VC_605_0	2.10819	3	Clustered
NAHH01000025.1||full_	from_hb	Snodgrassella alvi	NA	VC_605_0	28	0.994806	hb_hits	NA	1	preVC_605	0.2612	TRUE	NA	0.2599	VC_605_0	2.10819	3	Clustered
NAGY01000016.1||full_	from_hb	Snodgrassella alvi	NA	VC_605_0	28	0.994806	hb_hits	NA	1	preVC_605	0.2612	TRUE	NA	0.2599	VC_605_0	2.10819	3	Clustered
NAHK01000076.1||full_	from_hb	Snodgrassella alvi	NA	VC_603_0	27	0.854899	hb_hits	NA	1	preVC_603	0.0831	TRUE	NA	0.071	VC_603_0	3.83516	4	Clustered
JACG01000027.1||full_	from_hb	Snodgrassella alvi	NA	VC_603_0	27	0.854899	hb_hits	NA	1	preVC_603	0.0831	TRUE	NA	0.071	VC_603_0	3.83516	4	Clustered
NAHG01000075.1||full_	from_hb	Snodgrassella alvi	NA	VC_603_0	27	0.854899	hb_hits	NA	1	preVC_603	0.0831	TRUE	NA	0.071	VC_603_0	3.83516	4	Clustered
JAIL01000227.1||full_	from_hb	Snodgrassella alvi	NA	VC_603_0	27	0.854899	hb_hits	NA	1	preVC_603	0.0831	TRUE	NA	0.071	VC_603_0	3.83516	4	Clustered
LAWY01000015.1||full_1_	from_hb	Paenibacillus larvae	NA	VC_6_0	6	1	hb_hits	NA	1	preVC_6	0.2214	TRUE	NA	0.2214	VC_6_0	2.71831	7	Clustered
CP020557.1||6_partial_1_	from_hb	Paenibacillus larvae	NA	VC_6_0	6	1	hb_hits	NA	1	preVC_6	0.2214	TRUE	NA	0.2214	VC_6_0	2.71831	7	Clustered
CP020327.1||3_partial_1_	from_hb	Paenibacillus larvae	NA	VC_6_0	6	1	hb_hits	NA	1	preVC_6	0.2214	TRUE	NA	0.2214	VC_6_0	2.71831	7	Clustered
CP019717.1||5_partial_1_	from_hb	Paenibacillus larvae	NA	VC_6_0	6	1	hb_hits	NA	1	preVC_6	0.2214	TRUE	NA	0.2214	VC_6_0	2.71831	7	Clustered
CP019655.1||4_partial_1_	from_hb	Paenibacillus larvae	NA	VC_6_0	6	1	hb_hits	NA	1	preVC_6	0.2214	TRUE	NA	0.2214	VC_6_0	2.71831	7	Clustered
ADFW01000001.1||6_partial_1_	from_hb	Paenibacillus larvae	NA	VC_6_0	6	1	hb_hits	NA	1	preVC_6	0.2214	TRUE	NA	0.2214	VC_6_0	2.71831	7	Clustered
ADZY03000321.1||full_	from_hb	Paenibacillus larvae	NA	VC_6_0	6	1	hb_hits	NA	1	preVC_6	0.2214	TRUE	NA	0.2214	VC_6_0	2.71831	7	Clustered
WHNS01000006.1||0_partial_1_	from_hb	Bombella apis	NA	VC_549_0	26	0.996225	hb_hits	NA	1	preVC_549	0.2024	TRUE	NA	0.2017	VC_549_0	5.35666	3	Clustered
MEJG01000001.1||0_partial_1_	from_hb	Bombella apis	NA	VC_549_0	26	0.996225	hb_hits	NA	1	preVC_549	0.2024	TRUE	NA	0.2017	VC_549_0	5.35666	3	Clustered
LMYI01000002.1||0_partial_1_	from_hb	Bombella apis	NA	VC_549_0	26	0.996225	hb_hits	NA	1	preVC_549	0.2024	TRUE	NA	0.2017	VC_549_0	5.35666	3	Clustered
NART01000007.1||full_1_	from_hb	Gilliamella apicola	NA	VC_482_0	25	1	hb_hits	NA	1	preVC_482	0.2816	TRUE	NA	0.2816	VC_482_0	7.49627	5	Clustered
MZ424863	inphared	NA	Proteus phage vB_PmiM_ZX7	VC_482_0	25	1	Myoviridae	Unclassified	1	preVC_482	0.2816	TRUE	Unclassified	0.2816	VC_482_0	7.49627	5	Clustered
MG575421	inphared	NA	Proteus phage vB_PmiP_RS51pmB	VC_482_0	25	1	Myoviridae	Unclassified	1	preVC_482	0.2816	TRUE	Unclassified	0.2816	VC_482_0	7.49627	5	Clustered
CP013974	inphared	NA	Erwinia phage LS-2018a	VC_482_0	25	1	Myoviridae	Unclassified	1	preVC_482	0.2816	TRUE	Unclassified	0.2816	VC_482_0	7.49627	5	Clustered
CP009056.1||0_partial_1_	from_hb	Frischella perrara	NA	VC_482_0	25	1	hb_hits	NA	1	preVC_482	0.2816	TRUE	NA	0.2816	VC_482_0	7.49627	5	Clustered
MN830257	inphared	NA	Lactobacillus phage JNU_P11	VC_437_0	24	0.999591	Siphoviridae	Unclassified	1	preVC_437	0.3052	TRUE	Unclassified	0.3051	VC_437_0	6.28077	4	Clustered
QGLG01000002.1||1_partial_1_	from_hb	Lactobacillus melliventris	NA	VC_437_0	24	0.999591	hb_hits	NA	1	preVC_437	0.3052	TRUE	NA	0.3051	VC_437_0	6.28077	4	Clustered
KQ034021.1||0_partial_1_	from_hb	Lactobacillus melliventris	NA	VC_437_0	24	0.999591	hb_hits	NA	1	preVC_437	0.3052	TRUE	NA	0.3051	VC_437_0	6.28077	4	Clustered
JAAEEB010000013.1||full_	from_hb	Lactobacillus melliventris	NA	VC_437_0	24	0.999591	hb_hits	NA	1	preVC_437	0.3052	TRUE	NA	0.3051	VC_437_0	6.28077	4	Clustered
NASC01000090.1||full_1_	from_hb	Gilliamella apicola	NA	VC_387_0	23	0.869961	hb_hits	NA	1	preVC_387	0.2078	TRUE	NA	0.1808	VC_387_0	0	2	Clustered
NASB01000025.1||0_partial_1_	from_hb	Gilliamella apicola	NA	VC_387_0	23	0.869961	hb_hits	NA	1	preVC_387	0.2078	TRUE	NA	0.1808	VC_387_0	0	2	Clustered
JAAEDZ010000007.1||full_	from_hb	Lactobacillus mellis	NA	VC_309_0	22	0.967487	hb_hits	NA	0.6667	preVC_309	0.1175	TRUE	NA	0.1137	VC_309_0	8.22512	3	Clustered
JAAEDX010000001.1||0_partial_1_	from_hb	Lactobacillus mellis	NA	VC_309_0	22	0.967487	hb_hits	NA	0.6667	preVC_309	0.1175	TRUE	NA	0.1137	VC_309_0	8.22512	3	Clustered
JAAEDX010000004.1||full_	from_hb	Lactobacillus mellis	NA	VC_309_0	22	0.967487	hb_hits	NA	0.6667	preVC_309	0.1175	TRUE	NA	0.1137	VC_309_0	8.22512	3	Clustered
JSAZ01000002.1||0_partial_1_	from_hb	Melissococcus plutonius	NA	VC_307_0	21	0.999316	hb_hits	NA	1	preVC_307	0.5557	TRUE	NA	0.5553	VC_307_0	5.52842	3	Clustered
CM003359.1||full_	from_hb	Melissococcus plutonius	NA	VC_307_0	21	0.999316	hb_hits	NA	1	preVC_307	0.5557	TRUE	NA	0.5553	VC_307_0	5.52842	3	Clustered
JSAY01000004.1||0_partial_1_	from_hb	Melissococcus plutonius	NA	VC_307_0	21	0.999316	hb_hits	NA	1	preVC_307	0.5557	TRUE	NA	0.5553	VC_307_0	5.52842	3	Clustered
QGLP01000005.1||0_partial_1_	from_hb	Gilliamella apicola	NA	VC_288_2	20	0	hb_hits	NA	1	preVC_288	0	TRUE	NA	0	VC_288_2	0	1	Clustered/Singleton
NARX01000016.1||full_	from_hb	Gilliamella apicola	NA	VC_288_1	19	0	hb_hits	NA	1	preVC_288	0	TRUE	NA	0	VC_288_1	0	1	Clustered/Singleton
NARV01000002.1||full_1_	from_hb	Gilliamella apicola	NA	VC_288_0	18	0	hb_hits	NA	1	preVC_288	0	TRUE	NA	0	VC_288_0	0	1	Clustered/Singleton
LZGJ01000030.1||0_partial_1_	from_hb	Gilliamella apicola	NA	VC_23_0	10	1	hb_hits	NA	1	preVC_23	0.7281	TRUE	NA	0.7281	VC_23_0	3.84668	25	Clustered
JAIN01000001.1||0_partial_	from_hb	Gilliamella apicola	NA	VC_23_0	10	1	hb_hits	NA	1	preVC_23	0.7281	TRUE	NA	0.7281	VC_23_0	3.84668	25	Clustered
CM004509.1||0_partial_1_	from_hb	Gilliamella apicola	NA	VC_23_0	10	1	hb_hits	NA	1	preVC_23	0.7281	TRUE	NA	0.7281	VC_23_0	3.84668	25	Clustered
LZGH01000009.1||0_partial_1_	from_hb	Gilliamella apis	NA	VC_23_0	10	1	hb_hits	NA	1	preVC_23	0.7281	TRUE	NA	0.7281	VC_23_0	3.84668	25	Clustered
VMHM01000015.1||full_1_	from_hb	Gilliamella apicola	NA	VC_23_0	10	1	hb_hits	NA	1	preVC_23	0.7281	TRUE	NA	0.7281	VC_23_0	3.84668	25	Clustered
QGLR01000009.1||0_partial_1_	from_hb	Gilliamella apicola	NA	VC_23_0	10	1	hb_hits	NA	1	preVC_23	0.7281	TRUE	NA	0.7281	VC_23_0	3.84668	25	Clustered
QGLQ01000008.1||0_partial_1_	from_hb	Gilliamella apicola	NA	VC_23_0	10	1	hb_hits	NA	1	preVC_23	0.7281	TRUE	NA	0.7281	VC_23_0	3.84668	25	Clustered
VMHM01000017.1||full_1_	from_hb	Gilliamella apicola	NA	VC_23_0	10	1	hb_hits	NA	1	preVC_23	0.7281	TRUE	NA	0.7281	VC_23_0	3.84668	25	Clustered
NASU01000020.1||full_1_	from_hb	Gilliamella apis	NA	VC_23_0	10	1	hb_hits	NA	1	preVC_23	0.7281	TRUE	NA	0.7281	VC_23_0	3.84668	25	Clustered
NASB01000047.1||full_	from_hb	Gilliamella apicola	NA	VC_23_0	10	1	hb_hits	NA	1	preVC_23	0.7281	TRUE	NA	0.7281	VC_23_0	3.84668	25	Clustered
QGLP01000005.1||1_partial_1_	from_hb	Gilliamella apicola	NA	VC_23_0	10	1	hb_hits	NA	1	preVC_23	0.7281	TRUE	NA	0.7281	VC_23_0	3.84668	25	Clustered
QGLN01000004.1||0_partial_1_	from_hb	Gilliamella apis	NA	VC_23_0	10	1	hb_hits	NA	1	preVC_23	0.7281	TRUE	NA	0.7281	VC_23_0	3.84668	25	Clustered
NARY01000126.1||full_	from_hb	Gilliamella apicola	NA	VC_23_0	10	1	hb_hits	NA	1	preVC_23	0.7281	TRUE	NA	0.7281	VC_23_0	3.84668	25	Clustered
NARX01000099.1||full_	from_hb	Gilliamella apicola	NA	VC_23_0	10	1	hb_hits	NA	1	preVC_23	0.7281	TRUE	NA	0.7281	VC_23_0	3.84668	25	Clustered
NASA01000012.1||0_partial_1_	from_hb	Gilliamella apicola	NA	VC_23_0	10	1	hb_hits	NA	1	preVC_23	0.7281	TRUE	NA	0.7281	VC_23_0	3.84668	25	Clustered
NARZ01000046.1||full_	from_hb	Gilliamella apicola	NA	VC_23_0	10	1	hb_hits	NA	1	preVC_23	0.7281	TRUE	NA	0.7281	VC_23_0	3.84668	25	Clustered
NARV01000062.1||full_	from_hb	Gilliamella apicola	NA	VC_23_0	10	1	hb_hits	NA	1	preVC_23	0.7281	TRUE	NA	0.7281	VC_23_0	3.84668	25	Clustered
NARW01000044.1||full_	from_hb	Gilliamella apicola	NA	VC_23_0	10	1	hb_hits	NA	1	preVC_23	0.7281	TRUE	NA	0.7281	VC_23_0	3.84668	25	Clustered
NARP01000053.1||full_	from_hb	Gilliamella apicola	NA	VC_23_0	10	1	hb_hits	NA	1	preVC_23	0.7281	TRUE	NA	0.7281	VC_23_0	3.84668	25	Clustered
NARR01000021.1||full_1_	from_hb	Gilliamella apicola	NA	VC_23_0	10	1	hb_hits	NA	1	preVC_23	0.7281	TRUE	NA	0.7281	VC_23_0	3.84668	25	Clustered
NAHW01000044.1||full_	from_hb	Gilliamella apicola	NA	VC_23_0	10	1	hb_hits	NA	1	preVC_23	0.7281	TRUE	NA	0.7281	VC_23_0	3.84668	25	Clustered
NARO01000048.1||full_	from_hb	Gilliamella apicola	NA	VC_23_0	10	1	hb_hits	NA	1	preVC_23	0.7281	TRUE	NA	0.7281	VC_23_0	3.84668	25	Clustered
MZNI01000057.1||full_	from_hb	Gilliamella apicola	NA	VC_23_0	10	1	hb_hits	NA	1	preVC_23	0.7281	TRUE	NA	0.7281	VC_23_0	3.84668	25	Clustered
NAHU01000050.1||full_	from_hb	Gilliamella apicola	NA	VC_23_0	10	1	hb_hits	NA	1	preVC_23	0.7281	TRUE	NA	0.7281	VC_23_0	3.84668	25	Clustered
NAHT01000036.1||full_1_	from_hb	Gilliamella apicola	NA	VC_23_0	10	1	hb_hits	NA	1	preVC_23	0.7281	TRUE	NA	0.7281	VC_23_0	3.84668	25	Clustered
CH981455.1||full_	from_hb	Paenibacillus larvae	NA	VC_223_0	17	0.903512	hb_hits	NA	1	preVC_223	0.1131	TRUE	NA	0.1022	VC_223_0	1	2	Clustered
ADZY03000008.1||full_	from_hb	Paenibacillus larvae	NA	VC_223_0	17	0.903512	hb_hits	NA	1	preVC_223	0.1131	TRUE	NA	0.1022	VC_223_0	1	2	Clustered
CP020328.1||0_partial_	from_hb	Paenibacillus larvae	NA	VC_216_0	16	0	hb_hits	NA	1	preVC_216	0.1083	TRUE	NA	0	VC_216_0	8.48528	2	Clustered
CP019656.1||full_	from_hb	Paenibacillus larvae	NA	VC_216_0	16	0	hb_hits	NA	1	preVC_216	0.1083	TRUE	NA	0	VC_216_0	8.48528	2	Clustered
LAWY01000089.1||full_	from_hb	Paenibacillus larvae	NA	VC_215_0	15	0.899784	hb_hits	NA	1	preVC_215	0.0743	TRUE	NA	0.0669	VC_215_0	3	2	Clustered
CH981423.1||full_1_	from_hb	Paenibacillus larvae	NA	VC_215_0	15	0.899784	hb_hits	NA	1	preVC_215	0.0743	TRUE	NA	0.0669	VC_215_0	3	2	Clustered
LAWY01000028.1||0_partial_1_	from_hb	Paenibacillus larvae	NA	VC_214_0	14	0.989004	hb_hits	NA	1	preVC_214	0.348	TRUE	NA	0.3442	VC_214_0	2.57959	3	Clustered
CP019652.1||3_partial_1_	from_hb	Paenibacillus larvae	NA	VC_214_0	14	0.989004	hb_hits	NA	1	preVC_214	0.348	TRUE	NA	0.3442	VC_214_0	2.57959	3	Clustered
CH981398.1||0_partial_1_	from_hb	Paenibacillus larvae	NA	VC_214_0	14	0.989004	hb_hits	NA	1	preVC_214	0.348	TRUE	NA	0.3442	VC_214_0	2.57959	3	Clustered
CP019652.1||1_partial_1_	from_hb	Paenibacillus larvae	NA	VC_213_0	13	0.973347	hb_hits	NA	1	preVC_213	0.0825	TRUE	NA	0.0803	VC_213_0	4.60923	3	Clustered
CH981386.1||full_1_	from_hb	Paenibacillus larvae	NA	VC_213_0	13	0.973347	hb_hits	NA	1	preVC_213	0.0825	TRUE	NA	0.0803	VC_213_0	4.60923	3	Clustered
ADZY03000285.1||full_	from_hb	Paenibacillus larvae	NA	VC_213_0	13	0.973347	hb_hits	NA	1	preVC_213	0.0825	TRUE	NA	0.0803	VC_213_0	4.60923	3	Clustered
MG727697	inphared	NA	Paenibacillus phage Dragolir	VC_211_0	12	0.914674	Unclassified	Dragolirvirus	1	preVC_211	0.0308	TRUE	Gochnauervirinae	0.0282	VC_211_0	5.38516	2	Clustered
ADFW01000001.1||3_partial_1_	from_hb	Paenibacillus larvae	NA	VC_211_0	12	0.914674	hb_hits	NA	1	preVC_211	0.0308	TRUE	NA	0.0282	VC_211_0	5.38516	2	Clustered
CP019717.1||0_partial_2_	from_hb	Paenibacillus larvae	NA	VC_2_1	5	0	hb_hits	NA	1	preVC_2	0	TRUE	NA	0	VC_2_1	0	1	Clustered/Singleton
ADFW01000001.1||4_partial_1_	from_hb	Paenibacillus larvae	NA	VC_2_0	4	1	hb_hits	NA	0.825	preVC_2	0.341	TRUE	NA	0.341	VC_2_0	7.766	16	Clustered
CP020557.1||4_partial_1_	from_hb	Paenibacillus larvae	NA	VC_2_0	4	1	hb_hits	NA	0.825	preVC_2	0.341	TRUE	NA	0.341	VC_2_0	7.766	16	Clustered
CP020557.1||0_partial_1_	from_hb	Paenibacillus larvae	NA	VC_2_0	4	1	hb_hits	NA	0.825	preVC_2	0.341	TRUE	NA	0.341	VC_2_0	7.766	16	Clustered
CP020557.1||3_partial_1_	from_hb	Paenibacillus larvae	NA	VC_2_0	4	1	hb_hits	NA	0.825	preVC_2	0.341	TRUE	NA	0.341	VC_2_0	7.766	16	Clustered
CP020557.1||1_partial_1_	from_hb	Paenibacillus larvae	NA	VC_2_0	4	1	hb_hits	NA	0.825	preVC_2	0.341	TRUE	NA	0.341	VC_2_0	7.766	16	Clustered
CP019717.1||3_partial_1_	from_hb	Paenibacillus larvae	NA	VC_2_0	4	1	hb_hits	NA	0.825	preVC_2	0.341	TRUE	NA	0.341	VC_2_0	7.766	16	Clustered
CP020327.1||1_partial_1_	from_hb	Paenibacillus larvae	NA	VC_2_0	4	1	hb_hits	NA	0.825	preVC_2	0.341	TRUE	NA	0.341	VC_2_0	7.766	16	Clustered
CP019717.1||0_partial_3_	from_hb	Paenibacillus larvae	NA	VC_2_0	4	1	hb_hits	NA	0.825	preVC_2	0.341	TRUE	NA	0.341	VC_2_0	7.766	16	Clustered
CP019717.1||1_partial_2_	from_hb	Paenibacillus larvae	NA	VC_2_0	4	1	hb_hits	NA	0.825	preVC_2	0.341	TRUE	NA	0.341	VC_2_0	7.766	16	Clustered
CP019717.1||0_partial_1_	from_hb	Paenibacillus larvae	NA	VC_2_0	4	1	hb_hits	NA	0.825	preVC_2	0.341	TRUE	NA	0.341	VC_2_0	7.766	16	Clustered
CP019687.1||1_partial_1_	from_hb	Paenibacillus larvae	NA	VC_2_0	4	1	hb_hits	NA	0.825	preVC_2	0.341	TRUE	NA	0.341	VC_2_0	7.766	16	Clustered
CP019651.1||0_partial_1_	from_hb	Paenibacillus larvae	NA	VC_2_0	4	1	hb_hits	NA	0.825	preVC_2	0.341	TRUE	NA	0.341	VC_2_0	7.766	16	Clustered
CP019655.1||1_partial_1_	from_hb	Paenibacillus larvae	NA	VC_2_0	4	1	hb_hits	NA	0.825	preVC_2	0.341	TRUE	NA	0.341	VC_2_0	7.766	16	Clustered
CP019652.1||2_partial_1_	from_hb	Paenibacillus larvae	NA	VC_2_0	4	1	hb_hits	NA	0.825	preVC_2	0.341	TRUE	NA	0.341	VC_2_0	7.766	16	Clustered
ADZY03000162.1||full_	from_hb	Paenibacillus larvae	NA	VC_2_0	4	1	hb_hits	NA	0.825	preVC_2	0.341	TRUE	NA	0.341	VC_2_0	7.766	16	Clustered
AARF01000119.1||full_	from_hb	Paenibacillus larvae	NA	VC_2_0	4	1	hb_hits	NA	0.825	preVC_2	0.341	TRUE	NA	0.341	VC_2_0	7.766	16	Clustered
CH981374.1||full_1_	from_hb	Paenibacillus larvae	NA	VC_16_0	9	0.977088	hb_hits	NA	1	preVC_16	0.0712	TRUE	NA	0.0696	VC_16_0	3.24289	3	Clustered
ADFW01000007.1||full_	from_hb	Paenibacillus larvae	NA	VC_16_0	9	0.977088	hb_hits	NA	1	preVC_16	0.0712	TRUE	NA	0.0696	VC_16_0	3.24289	3	Clustered
ADZY03000221.1||full_	from_hb	Paenibacillus larvae	NA	VC_16_0	9	0.977088	hb_hits	NA	1	preVC_16	0.0712	TRUE	NA	0.0696	VC_16_0	3.24289	3	Clustered
NAHU01000086.1||full_	from_hb	Gilliamella apicola	NA	VC_1500_0	45	0	hb_hits	NA	1	preVC_1500	1	TRUE	NA	0	VC_1500_0	2.23607	2	Clustered
NAHS01000162.1||full_	from_hb	Gilliamella apicola	NA	VC_1500_0	45	0	hb_hits	NA	1	preVC_1500	1	TRUE	NA	0	VC_1500_0	2.23607	2	Clustered
MK533143	inphared	NA	Paenibacillus phage vB_PlaP_API480	VC_15_0	8	0.912164	Podoviridae	Unclassified	1	preVC_15	0.3047	TRUE	Unclassified	0.2779	VC_15_0	3	2	Clustered
CP019718.1||full_	from_hb	Paenibacillus larvae	NA	VC_15_0	8	0.912164	hb_hits	NA	1	preVC_15	0.3047	TRUE	NA	0.2779	VC_15_0	3	2	Clustered
MG711467	inphared	NA	Faecalibacterium phage FP_Taranis	VC_1_0	3	0.996828	Unclassified	Taranisvirus	1	preVC_1	0.1931	TRUE	Unclassified	0.1925	VC_1_0	6.50696	7	Clustered
MG711466	inphared	NA	Faecalibacterium phage FP_Toutatis	VC_1_0	3	0.996828	Unclassified	Toutatisvirus	1	preVC_1	0.1931	TRUE	Unclassified	0.1925	VC_1_0	6.50696	7	Clustered
KR131710	inphared	NA	Fusobacterium phage Funu1	VC_1_0	3	0.996828	Myoviridae	Unclassified	1	preVC_1	0.1931	TRUE	Unclassified	0.1925	VC_1_0	6.50696	7	Clustered
ADZY03000294.1||full_	from_hb	Paenibacillus larvae	NA	VC_1_0	3	0.996828	hb_hits	NA	1	preVC_1	0.1931	TRUE	NA	0.1925	VC_1_0	6.50696	7	Clustered
ON470610	inphared	NA	Escherichia phage vB_EcoM-473R2	VC_1_0	3	0.996828	Unclassified	Unclassified	1	preVC_1	0.1931	TRUE	Unclassified	0.1925	VC_1_0	6.50696	7	Clustered
ON470591	inphared	NA	Escherichia phage vB_EcoM-613R2	VC_1_0	3	0.996828	Myoviridae	Unclassified	1	preVC_1	0.1931	TRUE	Unclassified	0.1925	VC_1_0	6.50696	7	Clustered
MH884510	inphared	NA	Exiguobacterium phage vB_EalM-137	VC_1_0	3	0.996828	Myoviridae	Unclassified	1	preVC_1	0.1931	TRUE	Unclassified	0.1925	VC_1_0	6.50696	7	Clustered
ADFW01000001.1||0_partial_1_	from_hb	Paenibacillus larvae	NA	VC_0_1	2	0	hb_hits	NA	1	preVC_0	0	TRUE	NA	0	VC_0_1	0	1	Clustered/Singleton
LAWY01000049.1||full_1_	from_hb	Paenibacillus larvae	NA	VC_0_0	1	1	hb_hits	NA	1	preVC_0	0.7633	TRUE	NA	0.7633	VC_0_0	3.17279	31	Clustered
KT361655	inphared	NA	Paenibacillus phage Hayley	VC_0_0	1	1	Unclassified	Vegasvirus	1	preVC_0	0.7633	TRUE	Gochnauervirinae	0.7633	VC_0_0	3.17279	31	Clustered
KT361654	inphared	NA	Paenibacillus phage Vegas	VC_0_0	1	1	Unclassified	Vegasvirus	1	preVC_0	0.7633	TRUE	Gochnauervirinae	0.7633	VC_0_0	3.17279	31	Clustered
KT361657	inphared	NA	Paenibacillus phage Diane	VC_0_0	1	1	Unclassified	Vegasvirus	1	preVC_0	0.7633	TRUE	Gochnauervirinae	0.7633	VC_0_0	3.17279	31	Clustered
KT361656	inphared	NA	Paenibacillus phage Vadim	VC_0_0	1	1	Unclassified	Vegasvirus	1	preVC_0	0.7633	TRUE	Gochnauervirinae	0.7633	VC_0_0	3.17279	31	Clustered
CP019687.1||0_partial_1_	from_hb	Paenibacillus larvae	NA	VC_0_0	1	1	hb_hits	NA	1	preVC_0	0.7633	TRUE	NA	0.7633	VC_0_0	3.17279	31	Clustered
CP019651.1||2_partial_1_	from_hb	Paenibacillus larvae	NA	VC_0_0	1	1	hb_hits	NA	1	preVC_0	0.7633	TRUE	NA	0.7633	VC_0_0	3.17279	31	Clustered
CP020557.1||2_partial_1_	from_hb	Paenibacillus larvae	NA	VC_0_0	1	1	hb_hits	NA	1	preVC_0	0.7633	TRUE	NA	0.7633	VC_0_0	3.17279	31	Clustered
OP503988	inphared	NA	Paenibacillus phage WildCape	VC_0_0	1	1	Unclassified	Unclassified	1	preVC_0	0.7633	TRUE	Gochnauervirinae	0.7633	VC_0_0	3.17279	31	Clustered
OP503987	inphared	NA	Paenibacillus phage UtuhinaGold_Zacery	VC_0_0	1	1	Unclassified	Unclassified	1	preVC_0	0.7633	TRUE	Gochnauervirinae	0.7633	VC_0_0	3.17279	31	Clustered
OP503984	inphared	NA	Paenibacillus phage Rosalind	VC_0_0	1	1	Unclassified	Unclassified	1	preVC_0	0.7633	TRUE	Gochnauervirinae	0.7633	VC_0_0	3.17279	31	Clustered
OP503983	inphared	NA	Paenibacillus phage Rae2Bee1	VC_0_0	1	1	Unclassified	Unclassified	1	preVC_0	0.7633	TRUE	Gochnauervirinae	0.7633	VC_0_0	3.17279	31	Clustered
OP503986	inphared	NA	Paenibacillus phage TonyLawson77	VC_0_0	1	1	Unclassified	Unclassified	1	preVC_0	0.7633	TRUE	Gochnauervirinae	0.7633	VC_0_0	3.17279	31	Clustered
OP503985	inphared	NA	Paenibacillus phage Ted	VC_0_0	1	1	Unclassified	Unclassified	1	preVC_0	0.7633	TRUE	Gochnauervirinae	0.7633	VC_0_0	3.17279	31	Clustered
OP503980	inphared	NA	Paenibacillus phage Logan	VC_0_0	1	1	Unclassified	Unclassified	1	preVC_0	0.7633	TRUE	Gochnauervirinae	0.7633	VC_0_0	3.17279	31	Clustered
OP503979	inphared	NA	Paenibacillus phage Lena	VC_0_0	1	1	Unclassified	Unclassified	1	preVC_0	0.7633	TRUE	Gochnauervirinae	0.7633	VC_0_0	3.17279	31	Clustered
OP503982	inphared	NA	Paenibacillus phage Ollie	VC_0_0	1	1	Unclassified	Unclassified	1	preVC_0	0.7633	TRUE	Gochnauervirinae	0.7633	VC_0_0	3.17279	31	Clustered
OP503981	inphared	NA	Paenibacillus phage NHScienceFair	VC_0_0	1	1	Unclassified	Unclassified	1	preVC_0	0.7633	TRUE	Gochnauervirinae	0.7633	VC_0_0	3.17279	31	Clustered
OP503976	inphared	NA	Paenibacillus phage GaryLarson	VC_0_0	1	1	Unclassified	Unclassified	1	preVC_0	0.7633	TRUE	Gochnauervirinae	0.7633	VC_0_0	3.17279	31	Clustered
OP503975	inphared	NA	Paenibacillus phage FutureBee	VC_0_0	1	1	Unclassified	Unclassified	1	preVC_0	0.7633	TRUE	Gochnauervirinae	0.7633	VC_0_0	3.17279	31	Clustered
OP503978	inphared	NA	Paenibacillus phage Jacinda	VC_0_0	1	1	Unclassified	Unclassified	1	preVC_0	0.7633	TRUE	Gochnauervirinae	0.7633	VC_0_0	3.17279	31	Clustered
OP503977	inphared	NA	Paenibacillus phage GIW2016	VC_0_0	1	1	Unclassified	Unclassified	1	preVC_0	0.7633	TRUE	Gochnauervirinae	0.7633	VC_0_0	3.17279	31	Clustered
OP503972	inphared	NA	Paenibacillus phage Bob	VC_0_0	1	1	Unclassified	Unclassified	1	preVC_0	0.7633	TRUE	Gochnauervirinae	0.7633	VC_0_0	3.17279	31	Clustered
OP503971	inphared	NA	Paenibacillus phage Bloomfield	VC_0_0	1	1	Unclassified	Unclassified	1	preVC_0	0.7633	TRUE	Gochnauervirinae	0.7633	VC_0_0	3.17279	31	Clustered
OP503974	inphared	NA	Paenibacillus phage Dante	VC_0_0	1	1	Unclassified	Unclassified	1	preVC_0	0.7633	TRUE	Gochnauervirinae	0.7633	VC_0_0	3.17279	31	Clustered
OP503973	inphared	NA	Paenibacillus phage Carlos	VC_0_0	1	1	Unclassified	Unclassified	1	preVC_0	0.7633	TRUE	Gochnauervirinae	0.7633	VC_0_0	3.17279	31	Clustered
OP503968	inphared	NA	Paenibacillus phage ABAtENZ	VC_0_0	1	1	Unclassified	Unclassified	1	preVC_0	0.7633	TRUE	Gochnauervirinae	0.7633	VC_0_0	3.17279	31	Clustered
OP503543	inphared	NA	Paenibacillus phage BarryFoster_Benicio	VC_0_0	1	1	Unclassified	Unclassified	1	preVC_0	0.7633	TRUE	Gochnauervirinae	0.7633	VC_0_0	3.17279	31	Clustered
OP503970	inphared	NA	Paenibacillus phage ApiWellbeing	VC_0_0	1	1	Unclassified	Unclassified	1	preVC_0	0.7633	TRUE	Gochnauervirinae	0.7633	VC_0_0	3.17279	31	Clustered
OP503969	inphared	NA	Paenibacillus phage AJG77	VC_0_0	1	1	Unclassified	Unclassified	1	preVC_0	0.7633	TRUE	Gochnauervirinae	0.7633	VC_0_0	3.17279	31	Clustered
OP494865	inphared	NA	Paenibacillus phage LunBun	VC_0_0	1	1	Unclassified	Unclassified	1	preVC_0	0.7633	TRUE	Gochnauervirinae	0.7633	VC_0_0	3.17279	31	Clustered
CP019794.1||1_partial_1_	from_hb	Paenibacillus larvae	NA	Overlap (VC_9/VC_220)	O11		hb_hits	NA				TRUE	NA					Overlap (VC_9/VC_220)
CP019655.1||3_partial_1_	from_hb	Paenibacillus larvae	NA	Overlap (VC_9/VC_220)	O11		hb_hits	NA				TRUE	NA					Overlap (VC_9/VC_220)
QGLO01000004.1||1_partial_1_	from_hb	Gilliamella apis	NA	Overlap (VC_77/VC_289/VC_774)	O10		hb_hits	NA				TRUE	NA					Overlap (VC_77/VC_289/VC_774)
VMHL01000001.1||1_partial_1_	from_hb	Gilliamella apicola	NA	Overlap (VC_77/VC_289/VC_774)	O10		hb_hits	NA				TRUE	NA					Overlap (VC_77/VC_289/VC_774)
MCIU01000040.1||0_partial_1_	from_hb	Gilliamella apicola	NA	Overlap (VC_77/VC_289/VC_774)	O10		hb_hits	NA				TRUE	NA					Overlap (VC_77/VC_289/VC_774)
QGLO01000004.1||0_partial_1_	from_hb	Gilliamella apis	NA	Overlap (VC_77/VC_289)	O9		hb_hits	NA				TRUE	NA					Overlap (VC_77/VC_289)
NARR01000013.1||full_1_	from_hb	Gilliamella apicola	NA	Overlap (VC_77/VC_289)	O9		hb_hits	NA				TRUE	NA					Overlap (VC_77/VC_289)
LZGJ01000021.1||full_1_	from_hb	Gilliamella apicola	NA	Overlap (VC_77/VC_289)	O9		hb_hits	NA				TRUE	NA					Overlap (VC_77/VC_289)
LZGI01000018.1||0_partial_1_	from_hb	Gilliamella apis	NA	Overlap (VC_77/VC_289)	O9		hb_hits	NA				TRUE	NA					Overlap (VC_77/VC_289)
NARX01000029.1||full_	from_hb	Gilliamella apicola	NA	Overlap (VC_77/VC_289)	O9		hb_hits	NA				TRUE	NA					Overlap (VC_77/VC_289)
NXEN01000041.1||full_	from_hb	Snodgrassella alvi	NA	Overlap (VC_607/VC_608)	O8		hb_hits	NA				TRUE	NA					Overlap (VC_607/VC_608)
NAHB01000047.1||full_1_	from_hb	Snodgrassella alvi	NA	Overlap (VC_607/VC_608)	O8		hb_hits	NA				TRUE	NA					Overlap (VC_607/VC_608)
NAHD01000067.1||full_1_	from_hb	Snodgrassella alvi	NA	Overlap (VC_607/VC_608)	O8		hb_hits	NA				TRUE	NA					Overlap (VC_607/VC_608)
NAGY01000056.1||full_1_	from_hb	Snodgrassella alvi	NA	Overlap (VC_607/VC_608)	O8		hb_hits	NA				TRUE	NA					Overlap (VC_607/VC_608)
MVDP01000053.1||full_1_	from_hb	Snodgrassella alvi	NA	Overlap (VC_607/VC_608)	O8		hb_hits	NA				TRUE	NA					Overlap (VC_607/VC_608)
MEIN01000006.1||0_partial_1_	from_hb	Snodgrassella alvi	NA	Overlap (VC_607/VC_608)	O8		hb_hits	NA				TRUE	NA					Overlap (VC_607/VC_608)
NAHQ01000093.1||full_	from_hb	Snodgrassella alvi	NA	Overlap (VC_605/VC_607)	O7		hb_hits	NA				TRUE	NA					Overlap (VC_605/VC_607)
NAHP01000076.1||full_1_	from_hb	Snodgrassella alvi	NA	Overlap (VC_605/VC_607)	O7		hb_hits	NA				TRUE	NA					Overlap (VC_605/VC_607)
MEIJ01000027.1||0_partial_1_	from_hb	Snodgrassella alvi	NA	Overlap (VC_605/VC_607)	O7		hb_hits	NA				TRUE	NA					Overlap (VC_605/VC_607)
AVQL01000451.1||full_1_	from_hb	Snodgrassella alvi	NA	Overlap (VC_605/VC_607)	O7		hb_hits	NA				TRUE	NA					Overlap (VC_605/VC_607)
KT361651	inphared	NA	Paenibacillus phage Harrison	Overlap (VC_5/VC_220)	O6		Unclassified	Harrisonvirus				TRUE	Gochnauervirinae					Overlap (VC_5/VC_220)
KT361653	inphared	NA	Paenibacillus phage Paisley	Overlap (VC_5/VC_220)	O6		Unclassified	Harrisonvirus				TRUE	Gochnauervirinae					Overlap (VC_5/VC_220)
CP019687.1||2_partial_1_	from_hb	Paenibacillus larvae	NA	Overlap (VC_5/VC_220)	O6		hb_hits	NA				TRUE	NA					Overlap (VC_5/VC_220)
ADFW01000003.1||full_1_	from_hb	Paenibacillus larvae	NA	Overlap (VC_5/VC_220)	O6		hb_hits	NA				TRUE	NA					Overlap (VC_5/VC_220)
OP503990	inphared	NA	Paenibacillus phage Dash	Overlap (VC_5/VC_220)	O6		Unclassified	Fernvirus				TRUE	Unclassified					Overlap (VC_5/VC_220)
OP503989	inphared	NA	Paenibacillus phage Callan	Overlap (VC_5/VC_220)	O6		Unclassified	Fernvirus				TRUE	Unclassified					Overlap (VC_5/VC_220)
CH981474.1||full_1_	from_hb	Paenibacillus larvae	NA	Overlap (VC_5/VC_220)	O6		hb_hits	NA				TRUE	NA					Overlap (VC_5/VC_220)
OP503991	inphared	NA	Paenibacillus phage Lilo	Overlap (VC_5/VC_220)	O6		Unclassified	Harrisonvirus				TRUE	Gochnauervirinae					Overlap (VC_5/VC_220)
NAHM01000034.1||full_	from_hb	Snodgrassella alvi	NA	Overlap (VC_293/VC_422)	O5		hb_hits	NA				TRUE	NA					Overlap (VC_293/VC_422)
NAHL01000055.1||full_	from_hb	Snodgrassella alvi	NA	Overlap (VC_293/VC_422)	O5		hb_hits	NA				TRUE	NA					Overlap (VC_293/VC_422)
NAHP01000036.1||full_	from_hb	Snodgrassella alvi	NA	Overlap (VC_293/VC_422)	O5		hb_hits	NA				TRUE	NA					Overlap (VC_293/VC_422)
NAHD01000066.1||0_partial_1_	from_hb	Snodgrassella alvi	NA	Overlap (VC_293/VC_422)	O5		hb_hits	NA				TRUE	NA					Overlap (VC_293/VC_422)
NAHC01000040.1||full_	from_hb	Snodgrassella alvi	NA	Overlap (VC_293/VC_422)	O5		hb_hits	NA				TRUE	NA					Overlap (VC_293/VC_422)
NAHJ01000056.1||0_partial_1_	from_hb	Snodgrassella alvi	NA	Overlap (VC_293/VC_422)	O5		hb_hits	NA				TRUE	NA					Overlap (VC_293/VC_422)
NAHI01000068.1||0_partial_1_	from_hb	Snodgrassella alvi	NA	Overlap (VC_293/VC_422)	O5		hb_hits	NA				TRUE	NA					Overlap (VC_293/VC_422)
NAGW01000084.1||full_1_	from_hb	Snodgrassella alvi	NA	Overlap (VC_293/VC_422)	O5		hb_hits	NA				TRUE	NA					Overlap (VC_293/VC_422)
MVDP01000055.1||0_partial_1_	from_hb	Snodgrassella alvi	NA	Overlap (VC_293/VC_422)	O5		hb_hits	NA				TRUE	NA					Overlap (VC_293/VC_422)
NAGY01000055.1||0_partial_1_	from_hb	Snodgrassella alvi	NA	Overlap (VC_293/VC_422)	O5		hb_hits	NA				TRUE	NA					Overlap (VC_293/VC_422)
NAGX01000178.1||full_	from_hb	Snodgrassella alvi	NA	Overlap (VC_293/VC_422)	O5		hb_hits	NA				TRUE	NA					Overlap (VC_293/VC_422)
MEII01000018.1||0_partial_1_	from_hb	Snodgrassella alvi	NA	Overlap (VC_293/VC_422)	O5		hb_hits	NA				TRUE	NA					Overlap (VC_293/VC_422)
MEIN01000004.1||0_partial_1_	from_hb	Snodgrassella alvi	NA	Overlap (VC_293/VC_422)	O5		hb_hits	NA				TRUE	NA					Overlap (VC_293/VC_422)
JAIK01000388.1||full_	from_hb	Snodgrassella alvi	NA	Overlap (VC_293/VC_422)	O5		hb_hits	NA				TRUE	NA					Overlap (VC_293/VC_422)
NASB01000027.1||full_	from_hb	Gilliamella apicola	NA	Overlap (VC_289/VC_947)	O4		hb_hits	NA				TRUE	NA					Overlap (VC_289/VC_947)
MZNF01000033.1||full_1_	from_hb	Gilliamella apicola	NA	Overlap (VC_289/VC_947)	O4		hb_hits	NA				TRUE	NA					Overlap (VC_289/VC_947)
NART01000042.1||full_	from_hb	Gilliamella apicola	NA	Overlap (VC_289/VC_947)	O4		hb_hits	NA				TRUE	NA					Overlap (VC_289/VC_947)
NARU01000096.1||full_	from_hb	Gilliamella apicola	NA	Overlap (VC_289/VC_947)	O4		hb_hits	NA				TRUE	NA					Overlap (VC_289/VC_947)
NARU01000006.1||full_1_	from_hb	Gilliamella apicola	NA	Overlap (VC_289/VC_1267)	O3		hb_hits	NA				TRUE	NA					Overlap (VC_289/VC_1267)
MZNE01000010.1||full_1_	from_hb	Gilliamella apicola	NA	Overlap (VC_289/VC_1267)	O3		hb_hits	NA				TRUE	NA					Overlap (VC_289/VC_1267)
MZNF01000031.1||full_1_	from_hb	Gilliamella apicola	NA	Overlap (VC_289/VC_1267)	O3		hb_hits	NA				TRUE	NA					Overlap (VC_289/VC_1267)
LAWY01000036.1||full_1_	from_hb	Paenibacillus larvae	NA	Overlap (VC_212/VC_213)	O2		hb_hits	NA				TRUE	NA					Overlap (VC_212/VC_213)
CP020327.1||0_partial_2_	from_hb	Paenibacillus larvae	NA	Overlap (VC_212/VC_213)	O2		hb_hits	NA				TRUE	NA					Overlap (VC_212/VC_213)
CH981373.1||full_1_	from_hb	Paenibacillus larvae	NA	Overlap (VC_212/VC_213)	O2		hb_hits	NA				TRUE	NA					Overlap (VC_212/VC_213)
ADFW01000002.1||0_partial_1_	from_hb	Paenibacillus larvae	NA	Overlap (VC_212/VC_213)	O2		hb_hits	NA				TRUE	NA					Overlap (VC_212/VC_213)
ADZY03000119.1||full_	from_hb	Paenibacillus larvae	NA	Overlap (VC_212/VC_213)	O2		hb_hits	NA				TRUE	NA					Overlap (VC_212/VC_213)
AF195902	inphared	NA	Lactobacillus prophage Lj771	Overlap (VC_11/VC_438)	O1		Myoviridae	Unclassified				TRUE	Unclassified					Overlap (VC_11/VC_438)
QGLG01000002.1||0_partial_1_	from_hb	Lactobacillus melliventris	NA	Overlap (VC_11/VC_438)	O1		hb_hits	NA				TRUE	NA					Overlap (VC_11/VC_438)
KQ033871.1||0_partial_1_	from_hb	Lactobacillus kullabergensis	NA	Overlap (VC_11/VC_438)	O1		hb_hits	NA				TRUE	NA					Overlap (VC_11/VC_438)
KF767351	inphared	NA	Lactobacillus phage phi jlb1	Overlap (VC_11/VC_438)	O1		Myoviridae	Unclassified				TRUE	Unclassified					Overlap (VC_11/VC_438)
HE956704	inphared	NA	Lactobacillus phage phiAQ113	Overlap (VC_11/VC_438)	O1		Myoviridae	Unclassified				TRUE	Unclassified					Overlap (VC_11/VC_438)
DQ320509	inphared	NA	Lactobacillus phage KC5a	Overlap (VC_11/VC_438)	O1		Myoviridae	Unclassified				TRUE	Unclassified					Overlap (VC_11/VC_438)
MZNH01000124.1||full_	from_hb	Gilliamella apicola	NA	Outlier			hb_hits	NA				TRUE	NA					Outlier
MZNH01000138.1||full_	from_hb	Gilliamella apicola	NA	Outlier			hb_hits	NA				TRUE	NA					Outlier
CP019717.1||2_partial_1_	from_hb	Paenibacillus larvae	NA	Outlier			hb_hits	NA				TRUE	NA					Outlier
CP019794.1||2_partial_1_	from_hb	Paenibacillus larvae	NA	Outlier			hb_hits	NA				TRUE	NA					Outlier
ADZY03000352.1||full_	from_hb	Paenibacillus larvae	NA	Outlier			hb_hits	NA				TRUE	NA					Outlier
ADFW01000006.1||full_	from_hb	Paenibacillus larvae	NA	Outlier			hb_hits	NA				TRUE	NA					Outlier
NARU01000012.1||full_	from_hb	Gilliamella apicola	NA	Outlier			hb_hits	NA				TRUE	NA					Outlier
CP019655.1||0_partial_2_	from_hb	Paenibacillus larvae	NA	Outlier			hb_hits	NA				TRUE	NA					Outlier
CH981396.1||full_	from_hb	Paenibacillus larvae	NA	Outlier			hb_hits	NA				TRUE	NA					Outlier
AARF01000085.1||full_	from_hb	Paenibacillus larvae	NA	Outlier			hb_hits	NA				TRUE	NA					Outlier
LAWY01000067.1||full_	from_hb	Paenibacillus larvae	NA	Outlier			hb_hits	NA				TRUE	NA					Outlier
ADFW01000005.1||full_	from_hb	Paenibacillus larvae	NA	Outlier			hb_hits	NA				TRUE	NA					Outlier
JSBE01000006.1||0_partial_1_	from_hb	Melissococcus plutonius	NA	Outlier			hb_hits	NA				TRUE	NA					Outlier
LAWY01000065.1||full_	from_hb	Paenibacillus larvae	NA	Outlier			hb_hits	NA				TRUE	NA					Outlier
JSBF01000005.1||0_partial_1_	from_hb	Melissococcus plutonius	NA	Outlier			hb_hits	NA				TRUE	NA					Outlier
NASK01000099.1||0_partial_	from_hb	Gilliamella apis	NA	Outlier			hb_hits	NA				TRUE	NA					Outlier
AP018492.1||0_partial_1_	from_hb	Melissococcus plutonius	NA	Outlier			hb_hits	NA				TRUE	NA					Outlier
LXYS01000004.1||0_partial_1_	from_hb	Bartonella apis	NA	Outlier			hb_hits	NA				TRUE	NA					Outlier
JAIL01000246.1||full_	from_hb	Snodgrassella alvi	NA	Outlier			hb_hits	NA				TRUE	NA					Outlier
NASC01000057.1||full_	from_hb	Gilliamella apicola	NA	Outlier			hb_hits	NA				TRUE	NA					Outlier
AVQL01000428.1||full_1_	from_hb	Snodgrassella alvi	NA	Outlier			hb_hits	NA				TRUE	NA					Outlier
CH981432.1||full_	from_hb	Paenibacillus larvae	NA	Outlier			hb_hits	NA				TRUE	NA					Outlier
CH981467.1||full_	from_hb	Paenibacillus larvae	NA	Outlier			hb_hits	NA				TRUE	NA					Outlier
ADZY03000110.1||full_	from_hb	Paenibacillus larvae	NA	Outlier			hb_hits	NA				TRUE	NA					Outlier
ADZY03000097.1||full_	from_hb	Paenibacillus larvae	NA	Outlier			hb_hits	NA				TRUE	NA					Outlier
ADFW01000001.1||5_partial_1_	from_hb	Paenibacillus larvae	NA	Outlier			hb_hits	NA				TRUE	NA					Outlier
VMHL01000001.1||0_partial_1_	from_hb	Gilliamella apicola	NA	Outlier			hb_hits	NA				TRUE	NA					Outlier
NAHK01000087.1||full_	from_hb	Snodgrassella alvi	NA	Outlier			hb_hits	NA				TRUE	NA					Outlier
CP020558.1||full_	from_hb	Paenibacillus larvae	NA	Outlier			hb_hits	NA				TRUE	NA					Outlier
NARX01000067.1||full_	from_hb	Gilliamella apicola	NA	Outlier			hb_hits	NA				TRUE	NA					Outlier
MEJG01000009.1||full_	from_hb	Bombella apis	NA	Outlier			hb_hits	NA				TRUE	NA					Outlier
ADZY03000211.1||full_1_	from_hb	Paenibacillus larvae	NA	Outlier			hb_hits	NA				TRUE	NA					Outlier
LAWY01000041.1||full_1_	from_hb	Paenibacillus larvae	NA	Outlier			hb_hits	NA				TRUE	NA					Outlier
CP020557.1||5_partial_1_	from_hb	Paenibacillus larvae	NA	Outlier			hb_hits	NA				TRUE	NA					Outlier
CP020557.1||8_partial_	from_hb	Paenibacillus larvae	NA	Outlier			hb_hits	NA				TRUE	NA					Outlier
CP020557.1||7_partial_1_	from_hb	Paenibacillus larvae	NA	Outlier			hb_hits	NA				TRUE	NA					Outlier
CH981409.1||full_	from_hb	Paenibacillus larvae	NA	Outlier			hb_hits	NA				TRUE	NA					Outlier
CP019717.1||6_partial_1_	from_hb	Paenibacillus larvae	NA	Outlier			hb_hits	NA				TRUE	NA					Outlier
AARF01000247.1||full_	from_hb	Paenibacillus larvae	NA	Outlier			hb_hits	NA				TRUE	NA					Outlier
VMHM01000011.1||0_partial_1_	from_hb	Gilliamella apicola	NA	Outlier			hb_hits	NA				TRUE	NA					Outlier
NASV01000031.1||full_1_	from_hb	Gilliamella apis	NA	Outlier			hb_hits	NA				TRUE	NA					Outlier
ADZY03000041.1||full_	from_hb	Paenibacillus larvae	NA	Outlier			hb_hits	NA				TRUE	NA					Outlier
JAAEDX010000001.1||1_partial_1_	from_hb	Lactobacillus mellis	NA	Outlier			hb_hits	NA				TRUE	NA					Outlier
NASK01000096.1||full_1_	from_hb	Gilliamella apis	NA	Outlier			hb_hits	NA				TRUE	NA					Outlier
JAIO01000009.1||0_partial_1_	from_hb	Gilliamella apis	NA	Outlier			hb_hits	NA				TRUE	NA					Outlier
MVDP01000030.1||0_partial_	from_hb	Snodgrassella alvi	NA	Outlier			hb_hits	NA				TRUE	NA					Outlier
QGLR01000012.1||0_partial_1_	from_hb	Gilliamella apicola	NA	Outlier			hb_hits	NA				TRUE	NA					Outlier
NAHA01000048.1||full_	from_hb	Snodgrassella alvi	NA	Outlier			hb_hits	NA				TRUE	NA					Outlier
ADZY03000319.1||full_1_	from_hb	Paenibacillus larvae	NA	Outlier			hb_hits	NA				TRUE	NA					Outlier
ADZY03000229.1||full_	from_hb	Paenibacillus larvae	NA	Outlier			hb_hits	NA				TRUE	NA					Outlier
CP029544.1||0_partial_1_	from_hb	Lactobacillus helsingborgensis	NA	Outlier			hb_hits	NA				TRUE	NA					Outlier
CH981397.1||full_	from_hb	Paenibacillus larvae	NA	Outlier			hb_hits	NA				TRUE	NA					Outlier
ADFW01000001.1||1_partial_1_	from_hb	Paenibacillus larvae	NA	Outlier			hb_hits	NA				TRUE	NA					Outlier
WHNS01000010.1||0_partial_1_	from_hb	Bombella apis	NA	Outlier			hb_hits	NA				TRUE	NA					Outlier
AARF01000123.1||full_	from_hb	Paenibacillus larvae	NA	Outlier			hb_hits	NA				TRUE	NA					Outlier
CP020554.1||0_partial_1_	from_hb	Bombella apis	NA	Outlier			hb_hits	NA				TRUE	NA					Outlier
LAWY01000084.1||full_	from_hb	Paenibacillus larvae	NA	Outlier			hb_hits	NA				TRUE	NA					Outlier
LAWY01000075.1||full_	from_hb	Paenibacillus larvae	NA	Outlier			hb_hits	NA				TRUE	NA					Outlier
LAWY01000091.1||full_	from_hb	Paenibacillus larvae	NA	Outlier			hb_hits	NA				TRUE	NA					Outlier
JAIN01000037.1||full_1_	from_hb	Gilliamella apicola	NA	Outlier			hb_hits	NA				TRUE	NA					Outlier
ADZY03000328.1||full_	from_hb	Paenibacillus larvae	NA	Outlier			hb_hits	NA				TRUE	NA					Outlier
NAHX01000216.1||full_1_	from_hb	Gilliamella apicola	NA	Outlier			hb_hits	NA				TRUE	NA					Outlier
CH981502.1||full_	from_hb	Paenibacillus larvae	NA	Outlier			hb_hits	NA				TRUE	NA					Outlier
CH981519.1||full_	from_hb	Paenibacillus larvae	NA	Outlier			hb_hits	NA				TRUE	NA					Outlier
CH981511.1||full_	from_hb	Paenibacillus larvae	NA	Outlier			hb_hits	NA				TRUE	NA					Outlier
ADZY03000216.1||full_	from_hb	Paenibacillus larvae	NA	Outlier			hb_hits	NA				TRUE	NA					Outlier
JSAZ01000001.1||0_partial_1_	from_hb	Melissococcus plutonius	NA	Outlier			hb_hits	NA				TRUE	NA					Outlier
CP007287.1||0_partial_1_	from_hb	Bifidobacterium coryneforme	NA	Outlier			hb_hits	NA				TRUE	NA					Outlier
QGLO01000004.1||2_partial_1_	from_hb	Gilliamella apis	NA	Outlier			hb_hits	NA				TRUE	NA					Outlier
VMHL01000006.1||0_partial_1_	from_hb	Gilliamella apicola	NA	Outlier			hb_hits	NA				TRUE	NA					Outlier
NASH01000020.1||0_partial_1_	from_hb	Gilliamella apis	NA	Outlier			hb_hits	NA				TRUE	NA					Outlier
NASM01000113.1||full_	from_hb	Gilliamella apis	NA	Outlier			hb_hits	NA				TRUE	NA					Outlier
WHNS01000008.1||full_	from_hb	Bombella apis	NA	Outlier			hb_hits	NA				TRUE	NA					Outlier
NARU01000131.1||full_	from_hb	Gilliamella apicola	NA	Outlier			hb_hits	NA				TRUE	NA					Outlier
JACG01000005.1||full_1_	from_hb	Snodgrassella alvi	NA	Outlier			hb_hits	NA				TRUE	NA					Outlier
NARX01000081.1||full_	from_hb	Gilliamella apicola	NA	Outlier			hb_hits	NA				TRUE	NA					Outlier
NARQ01000057.1||full_	from_hb	Gilliamella apicola	NA	Outlier			hb_hits	NA				TRUE	NA					Outlier
MZNE01000078.1||full_	from_hb	Gilliamella apicola	NA	Outlier			hb_hits	NA				TRUE	NA					Outlier
NARQ01000060.1||full_	from_hb	Gilliamella apicola	NA	Outlier			hb_hits	NA				TRUE	NA					Outlier
CH981405.1||full_1_	from_hb	Paenibacillus larvae	NA	Outlier			hb_hits	NA				TRUE	NA					Outlier
LAWY01000071.1||full_	from_hb	Paenibacillus larvae	NA	Outlier			hb_hits	NA				TRUE	NA					Outlier
LAWY01000063.1||full_	from_hb	Paenibacillus larvae	NA	Outlier			hb_hits	NA				TRUE	NA					Outlier
